# Supplementary material for: Catalytic Asymmetric Conjugate Addition and Sulfenylation of Diarylthiazolidin-2,4-diones
Source: Atypon-hosted journal article supplement (doi:10.1021/acs.joc.6b01637), 2016-09-23

# Supporting Information

## Catalytic Asymmetric Conjugate Addition and Sulfonylation of Diarylthiazolidin-2,4-Diones

Lihui Jiao,<sup>†</sup> Liwei Bu,<sup>†</sup> Xinyi Ye,<sup>‡</sup> Xiaowei Zhao,<sup>†</sup> and Zhiyong Jiang<sup>\*,†</sup>

<sup>†</sup>*Key Laboratory of Natural Medicine and Immuno-Engineering of Henan Province, Henan University, Kaifeng, Henan, P. R. China, 475004*

<sup>‡</sup>*Division of Chemistry and Biological Chemistry, Nanyang Technological University, 21 Nanyang Link, 637371, Singapore*

*E-mail: chmjzy@henu.edu.cn*

## Table of Contents

|                                                                         |        |
|-------------------------------------------------------------------------|--------|
| 1. Optimization of the reaction conditions                              | S3-4   |
| 2. Copies of HPLC spectra                                               | S5-26  |
| 3. Determination of the absolute configuration by X-ray crystallography | S27-39 |
| 4. Copies of NMR spectra                                                | S40-82 |

## 1. Optimization of the reaction conditions

**Table S1. Investigation on the effect of additives**

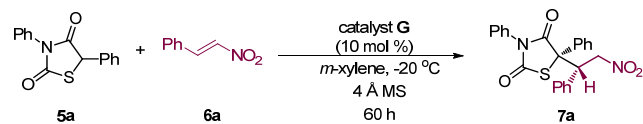

| entry | additive                         | <i>ee</i> (%) | <i>dr</i> |
|-------|----------------------------------|---------------|-----------|
| 1     | K <sub>2</sub> HPO <sub>4</sub>  | 77/1          | 87:13     |
| 2     | Na <sub>2</sub> HPO <sub>4</sub> | 73/7          | 85:15     |
| 3     | KH <sub>2</sub> PO <sub>4</sub>  | 77/6          | 87:13     |
| 4     | NaH <sub>2</sub> PO <sub>4</sub> | 77/8          | 85:15     |
| 5     | K <sub>3</sub> PO <sub>4</sub>   | 53/9          | 71:29     |
| 6     | Na <sub>3</sub> PO <sub>4</sub>  | 17/21         | 62:38     |
| 7     | NaPF <sub>6</sub>                | 20/0          | 66:34     |
| 8     | LiF                              | 77/0          | 88:12     |
| 9     | NaF                              | 76/8          | 90:10     |
| 10    | KF                               | 73/6          | 88:12     |
| 11    | NaBr                             | 86/14         | 94:6      |
| 12    | NaI                              | 81/1          | 91:9      |
| 13    | PhSO <sub>2</sub> Na             | 80/2          | 93:7      |
| 14    | NH <sub>4</sub> Cl               | 62/0          | 77:23     |
| 15    | LiCl                             | 85/6          | 91:9      |
| 16    | NaCl                             | 89/4          | 90:10     |

Table S2. Optimization of the reaction conditions of sulfenylation<sup>a</sup>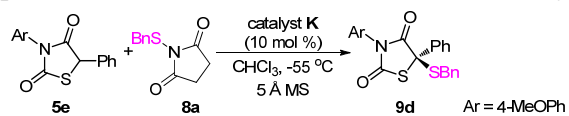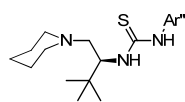H: Ar'' = 3,5-(CF<sub>3</sub>)<sub>2</sub>PhI: Ar'' = 3,5-(OCH<sub>3</sub>)<sub>2</sub>PhJ: Ar'' = 3,5-F<sub>2</sub>Ph

K: Ar'' = 4-MeOPh

L: Ar'' = 4-tBuPh

M: Ar'' = 4-ClPh

N: Ar'' = 3-ClPh

O: Ar'' = 2-ClPh

P: Ar'' = Ph

| entry           | cat. | solvent                         | additive | T (°C) | ee (%) |
|-----------------|------|---------------------------------|----------|--------|--------|
| 1               | H    | CH <sub>2</sub> Cl <sub>2</sub> | --       | 25     | 40     |
| 2               | H    | toluene                         | --       | 25     | 12     |
| 3               | H    | THF                             | --       | 25     | 12     |
| 4               | H    | Et <sub>2</sub> O               | --       | 25     | 20     |
| 5               | H    | DCE                             | --       | 25     | 42     |
| 6               | H    | CHCl <sub>3</sub>               | --       | 25     | 32     |
| 7               | H    | DCE                             | --       | 10     | 50     |
| 8               | H    | DCE                             | --       | 0      | 55     |
| 9               | H    | DCE                             | --       | -10    | 64     |
| 10              | H    | DCE                             | --       | -20    | 60     |
| 11              | I    | DCE                             | --       | -10    | 73     |
| 12              | J    | DCE                             | --       | -10    | 67     |
| 13              | K    | DCE                             | --       | -10    | 74     |
| 14              | L    | DCE                             | --       | -10    | 72     |
| 15              | M    | DCE                             | --       | -10    | 73     |
| 16              | N    | DCE                             | --       | -10    | 70     |
| 17              | O    | DCE                             | --       | -10    | 69     |
| 18              | P    | DCE                             | --       | -10    | 72     |
| 19              | K    | CH <sub>2</sub> Cl <sub>2</sub> | --       | -10    | 68     |
| 20              | K    | THF                             | --       | -10    | 59     |
| 21              | K    | DCE                             | --       | -20    | 76     |
| 24              | K    | DCE                             | --       | -30    | 78     |
| 25              | K    | DCE                             | --       | -40    | 79     |
| 26              | K    | DCE                             | --       | -50    | 79     |
| 27              | K    | DCE                             | --       | -60    | 72     |
| 28              | K    | DCE                             | --       | -70    | 67     |
| 29              | K    | CH <sub>2</sub> Cl <sub>2</sub> | --       | -40    | 78     |
| 30              | K    | CHCl <sub>3</sub>               | --       | -40    | 82     |
| 31              | K    | CHCl <sub>3</sub>               | 5 Å MS   | -40    | 86     |
| 32 <sup>b</sup> | K    | CHCl <sub>3</sub>               | 5 Å MS   | -55    | 91     |

<sup>a</sup>5e:8a = 1:1.2. <sup>b</sup>5e:8a = 1:2.0

## 2. Copies of HPLC spectra

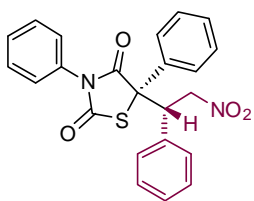

7a

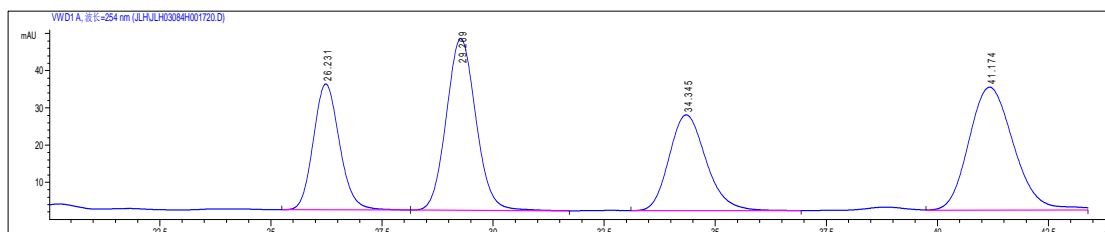

| Entry | Retention Time | Area   | Height | %Area  |
|-------|----------------|--------|--------|--------|
| 1     | 26.231         | 1386.2 | 33.8   | 19.281 |
| 2     | 29.269         | 2129.9 | 46.2   | 29.625 |
| 3     | 34.347         | 1455.8 | 25.5   | 20.249 |
| 4     | 41.174         | 2217.6 | 32.7   | 30.845 |

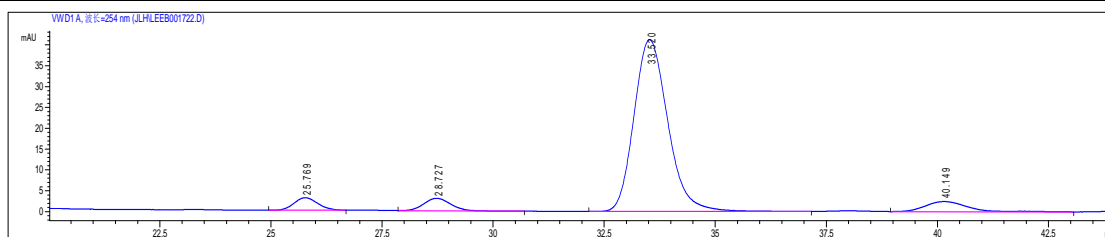

| Entry | Retention Time | Area   | Height | %Area  |
|-------|----------------|--------|--------|--------|
| 1     | 25.77          | 110    | 3      | 4.348  |
| 2     | 28.728         | 117.1  | 2.9    | 4.631  |
| 3     | 33.518         | 2169.4 | 41.2   | 85.775 |
| 4     | 40.16          | 132.7  | 2.3    | 5.247  |

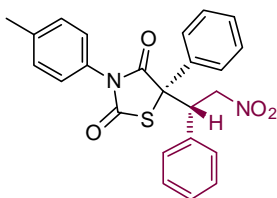

7b

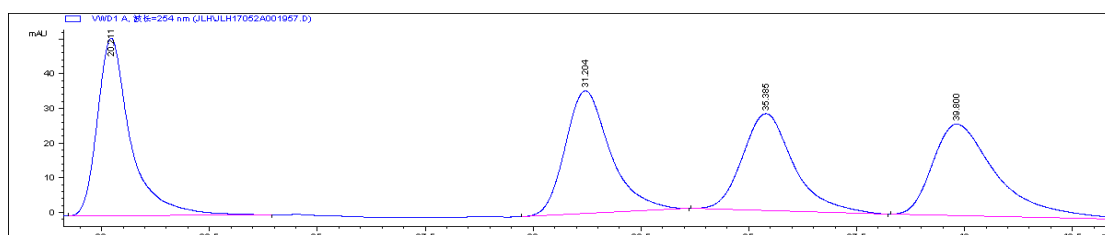

| Entry | Retention Time | Area   | Height | %Area  |
|-------|----------------|--------|--------|--------|
| 1     | 20.211         | 2740.1 | 51.2   | 26.411 |
| 2     | 31.204         | 2573.5 | 35.4   | 24.805 |
| 3     | 35.385         | 2305.2 | 28     | 22.220 |
| 4     | 39.8           | 2756   | 26.5   | 26.564 |

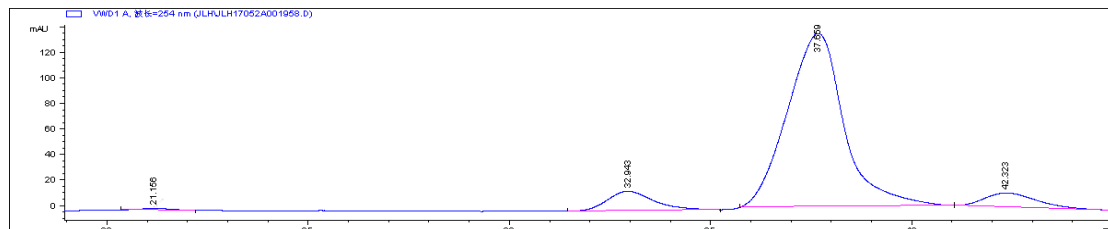

| Entry | Retention Time | Area    | Height | %Area  |
|-------|----------------|---------|--------|--------|
| 1     | 21.156         | 90.2    | 1.6    | 0.581  |
| 2     | 32.943         | 1206    | 15.2   | 7.762  |
| 3     | 37.659         | 13250.4 | 135.6  | 85.282 |
| 4     | 42.323         | 990.4   | 10.9   | 6.375  |

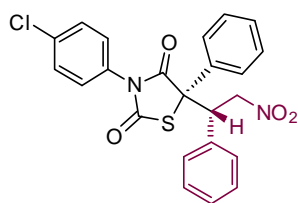

7c

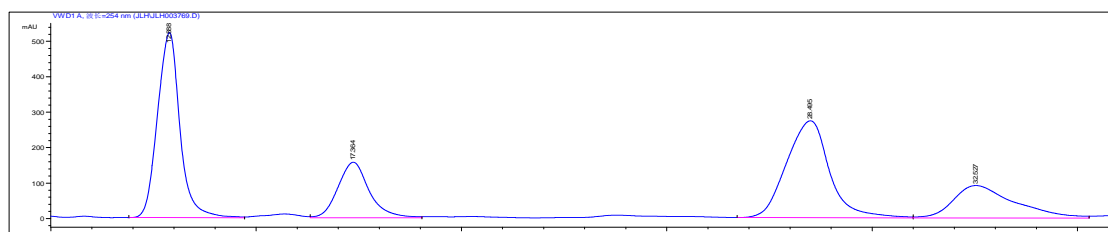

| Entry | Retention Time | Area    | Height | %Area  |
|-------|----------------|---------|--------|--------|
| 1     | 12.888         | 19735.9 | 522.3  | 35.504 |
| 2     | 17.365         | 7892.7  | 154.4  | 14.199 |
| 3     | 28.495         | 19554   | 272.5  | 35.177 |
| 4     | 32.527         | 8405.1  | 87.8   | 15.120 |

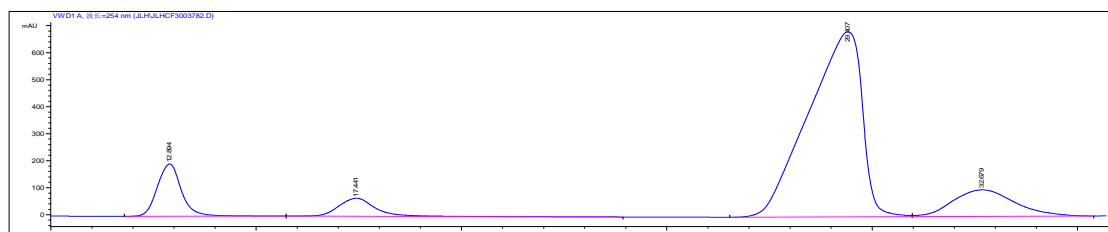

| Entry | Retention Time | Area    | Height | %Area  |
|-------|----------------|---------|--------|--------|
| 1     | 12.895         | 7571.7  | 192    | 9.110  |
| 2     | 17.443         | 3634.6  | 64.2   | 4.373  |
| 3     | 29.407         | 62218.8 | 685.2  | 74.860 |
| 4     | 32.68          | 9688.4  | 96.1   | 11.657 |

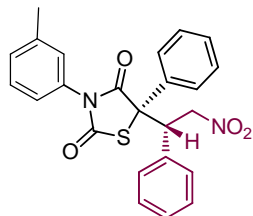

7e

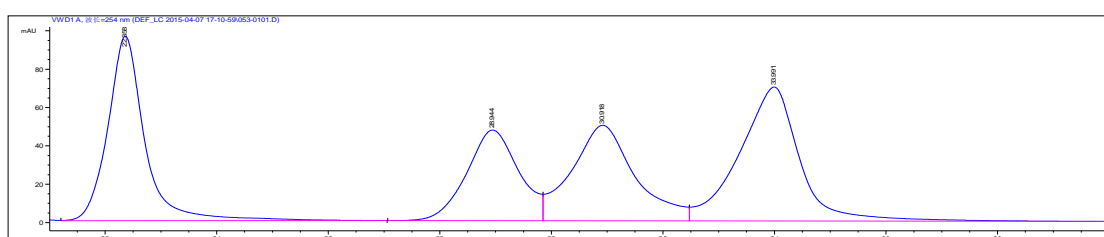

| Entry | Retention Time | Area   | Height | %Area  |
|-------|----------------|--------|--------|--------|
| 1     | 24.725         | 322    | 6.5    | 5.894  |
| 2     | 29.265         | 237.9  | 2.9    | 4.354  |
| 3     | 31.317         | 301.6  | 4      | 5.520  |
| 4     | 34.402         | 4601.7 | 61.7   | 84.231 |

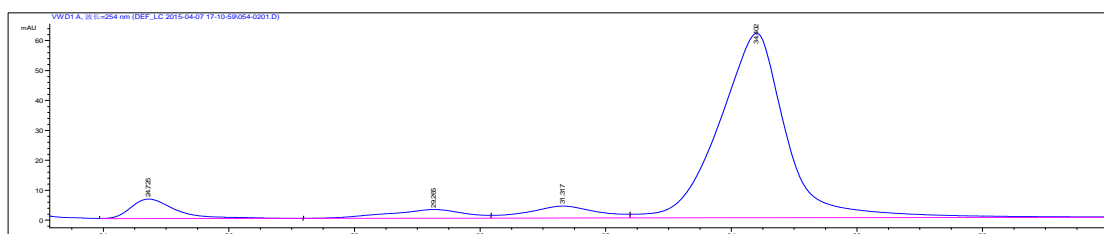

| Entry | Retention Time | Area   | Height | %Area  |
|-------|----------------|--------|--------|--------|
| 1     | 22.358         | 4436.1 | 96.2   | 26.579 |
| 2     | 28.944         | 2725.2 | 44.2   | 20.438 |
| 3     | 30.918         | 3023.8 | 43.7   | 22.678 |
| 4     | 33.991         | 5260.5 | 69.9   | 31.519 |

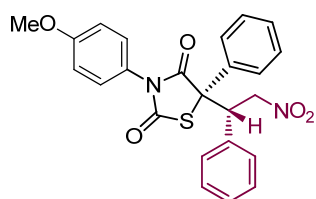

7f

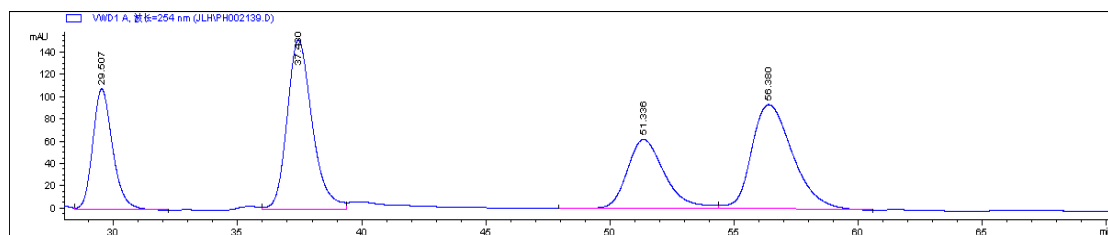

| Entry | Retention Time | Area    | Height | %Area  |
|-------|----------------|---------|--------|--------|
| 1     | 29.507         | 6093    | 108.6  | 17.689 |
| 2     | 37.43          | 10808.8 | 152.6  | 31.380 |
| 3     | 51.336         | 6618.3  | 62.3   | 19.214 |
| 4     | 56.38          | 10925   | 94.1   | 31.717 |

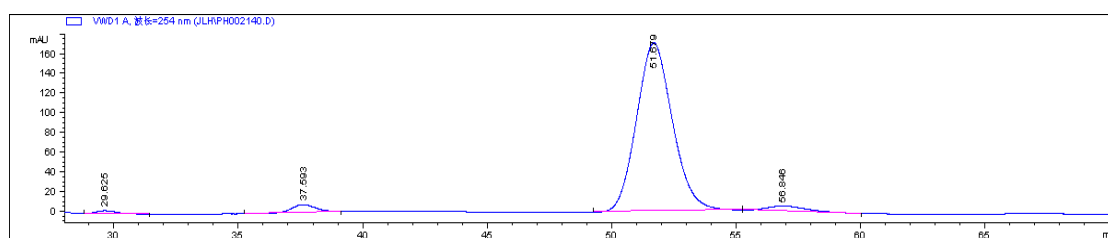

| Entry | Retention Time | Area    | Height | %Area  |
|-------|----------------|---------|--------|--------|
| 1     | 29.625         | 188.1   | 3.2    | 1.018  |
| 2     | 37.592         | 518     | 7.7    | 2.805  |
| 3     | 51.679         | 17181.8 | 170.9  | 93.044 |
| 4     | 56.845         | 578.5   | 5.2    | 3.133  |

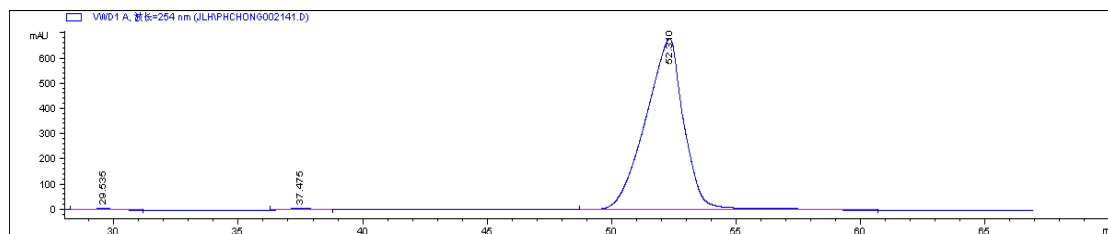

| Entry | Retention Time | Area    | Height | %Area   |
|-------|----------------|---------|--------|---------|
| 3     | 52.310         | 72596.9 | 678    | 100.000 |

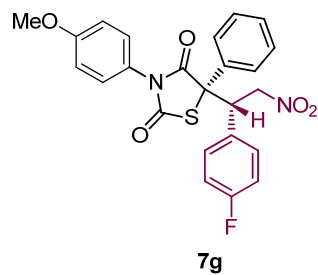



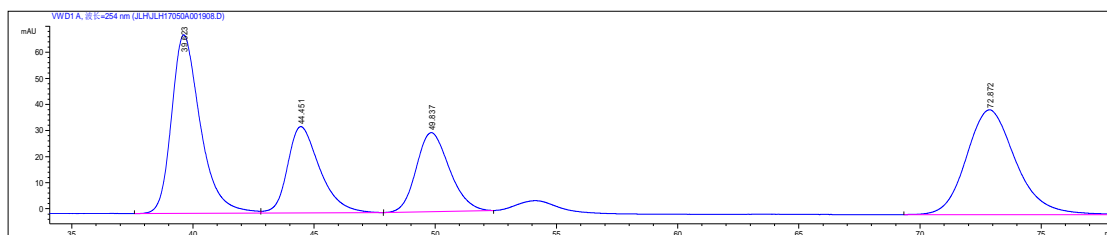

| Entry | Retention Time | Area   | Height | %Area  |
|-------|----------------|--------|--------|--------|
| 1     | 39.623         | 5648.9 | 68.4   | 32.688 |
| 2     | 44.451         | 3058.2 | 33.1   | 17.696 |
| 3     | 49.837         | 2871.2 | 30.3   | 16.615 |
| 4     | 72.872         | 5702.9 | 40.2   | 33.000 |

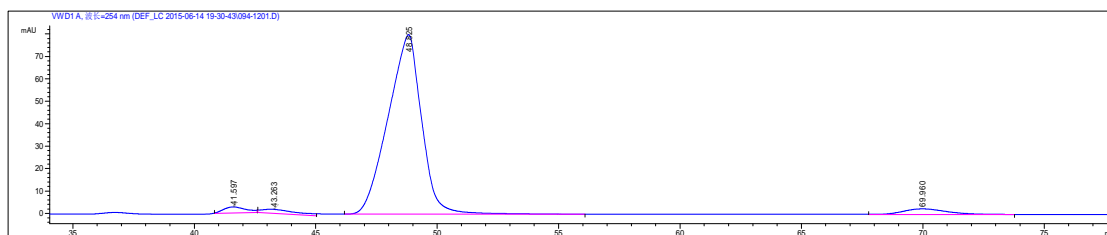

| Entry | Retention Time | Area   | Height | %Area  |
|-------|----------------|--------|--------|--------|
| 1     | 41.597         | 174.4  | 2.7    | 2.099  |
| 2     | 43.263         | 179.3  | 1.8    | 2.159  |
| 3     | 48.825         | 7653.3 | 80     | 92.126 |
| 4     | 69.96          | 300.5  | 2.5    | 3.617  |

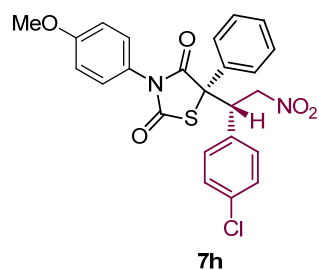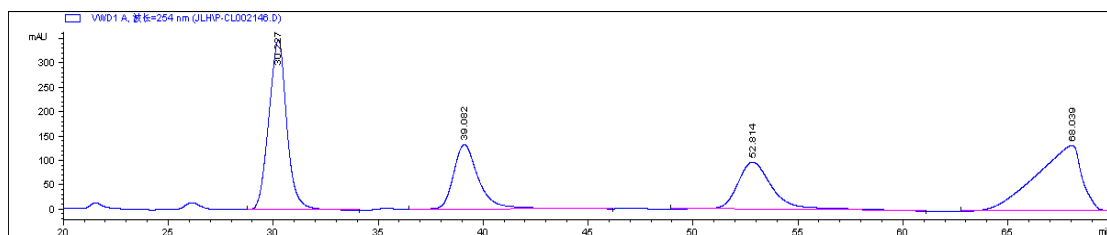

| Entry | Retention Time | Area    | Height | %Area  |
|-------|----------------|---------|--------|--------|
| 1     | 30.228         | 20752.4 | 349.5  | 32.266 |
| 2     | 39.081         | 11222.8 | 133.1  | 17.449 |
| 3     | 52.814         | 11684.8 | 97.8   | 18.168 |
| 4     | 68.044         | 20656.5 | 135.6  | 32.117 |

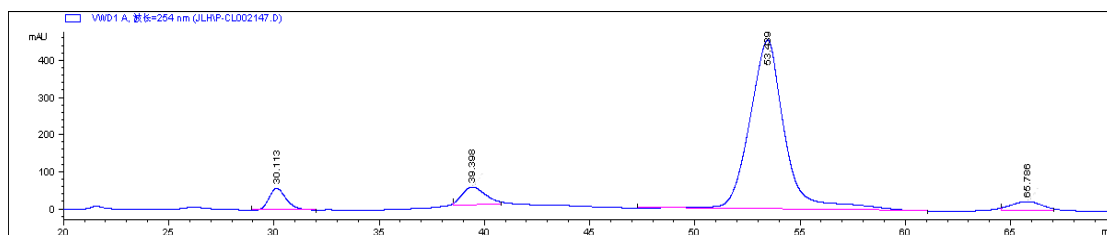

| Entry | Retention Time | Area    | Height | %Area  |
|-------|----------------|---------|--------|--------|
| 1     | 30.113         | 3321.6  | 58.3   | 5.299  |
| 2     | 39.398         | 3991.6  | 50.1   | 6.367  |
| 3     | 53.439         | 52753.1 | 455.8  | 84.153 |
| 4     | 65.788         | 2621.1  | 25.7   | 4.181  |

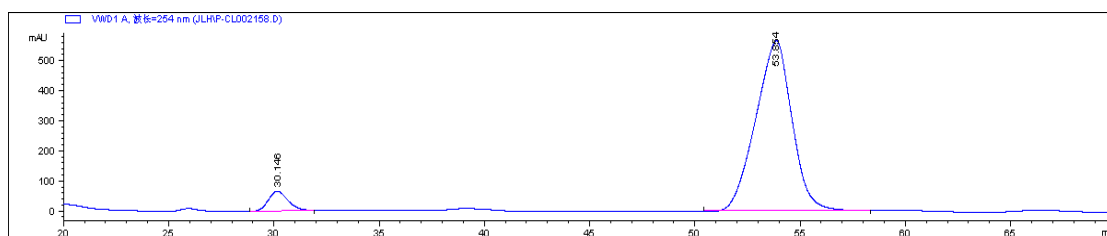

| Entry | Retention Time | Area    | Height | %Area  |
|-------|----------------|---------|--------|--------|
| 1     | 30.149         | 3781.7  | 61.7   | 5.276  |
| 2     | 53.855         | 67895.8 | 565.6  | 94.724 |

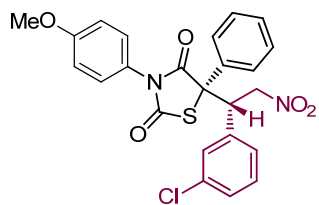

7i

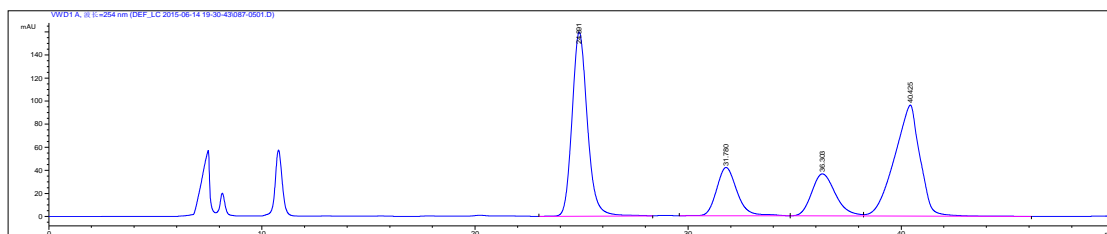

| Entry | Retention Time | Area   | Height | %Area  |
|-------|----------------|--------|--------|--------|
| 1     | 24.891         | 7968.6 | 159.6  | 36.971 |
| 2     | 31.78          | 2793   | 41.9   | 12.958 |
| 3     | 36.303         | 2811.5 | 36.4   | 13.044 |
| 4     | 40.425         | 7980.8 | 96.2   | 37.027 |

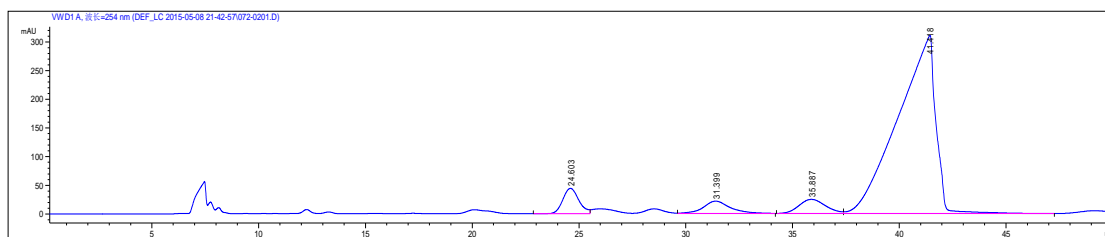

| Entry | Retention Time | Area    | Height | %Area  |
|-------|----------------|---------|--------|--------|
| 1     | 24.603         | 2291.4  | 44.1   | 5.183  |
| 2     | 31.399         | 1862.5  | 21.5   | 4.213  |
| 3     | 35.887         | 2083    | 24.4   | 4.712  |
| 4     | 41.418         | 37973.6 | 310    | 85.893 |

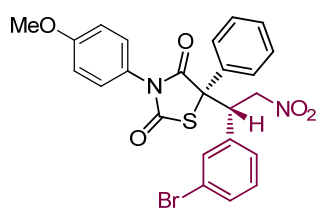

7j

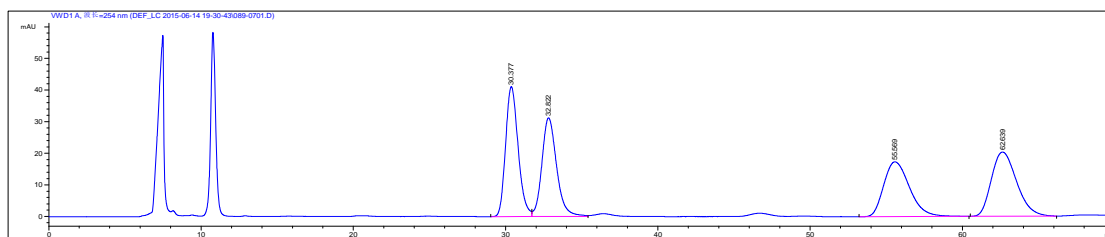

| Entry | Retention Time | Area   | Height | %Area  |
|-------|----------------|--------|--------|--------|
| 1     | 30.377         | 2352.3 | 41.1   | 26.673 |
| 2     | 32.822         | 2100.5 | 31.3   | 23.817 |
| 3     | 55.569         | 2031.1 | 17.3   | 23.031 |
| 4     | 62.639         | 2335.3 | 20.3   | 26.479 |

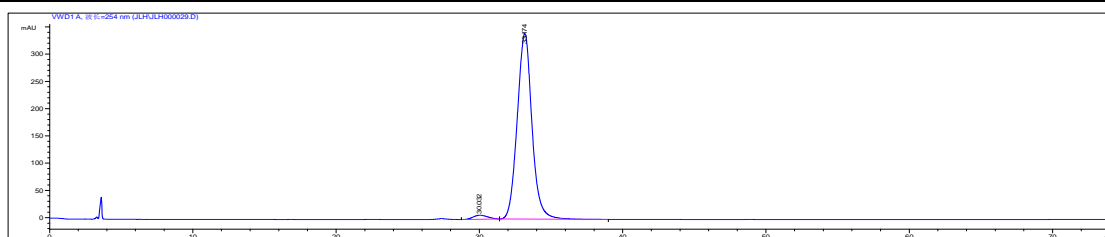

| Entry | Retention Time | Area    | Height | %Area  |
|-------|----------------|---------|--------|--------|
| 1     | 30.032         | 518.9   | 7.4    | 2.090  |
| 2     | 33.174         | 24315.8 | 340.4  | 97.910 |

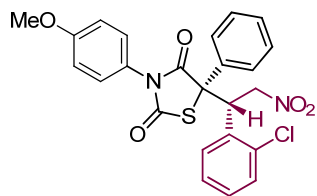

7k

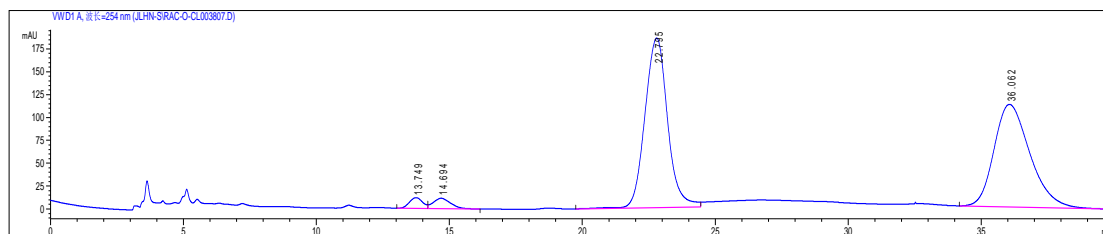

| Entry | Retention Time | Area    | Height | %Area  |
|-------|----------------|---------|--------|--------|
| 1     | 13.749         | 409.5   | 11.8   | 1.828  |
| 2     | 14.694         | 518.4   | 11.4   | 2.313  |
| 3     | 22.795         | 10979.8 | 185.4  | 48.998 |
| 4     | 36.062         | 10501   | 112    | 46.861 |

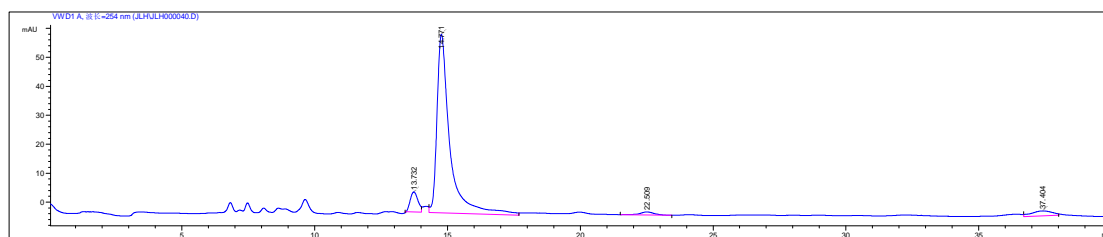

| Entry | Retention Time | Area   | Height | %Area  |
|-------|----------------|--------|--------|--------|
| 1     | 13.732         | 140.4  | 7      | 5.927  |
| 2     | 14.771         | 2091.9 | 61.7   | 88.338 |
| 3     | 22.509         | 40.1   | 1.1    | 1.694  |
| 4     | 37.404         | 95.7   | 1.7    | 4.041  |

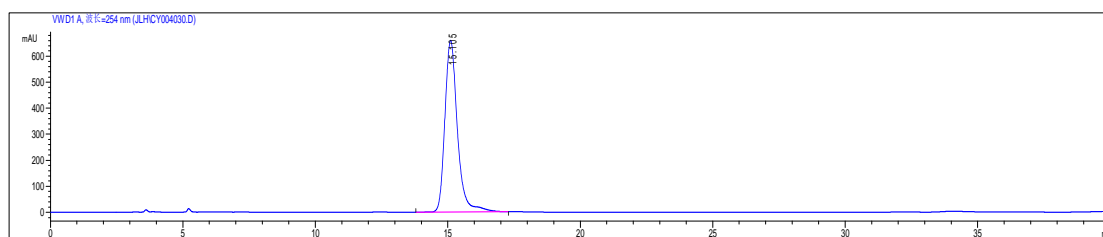

| Entry | Retention Time | Area    | Height | %Area   |
|-------|----------------|---------|--------|---------|
| 1     | 15.105         | 21624.7 | 659.5  | 100.000 |

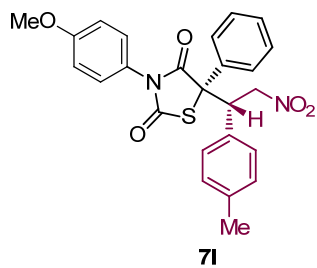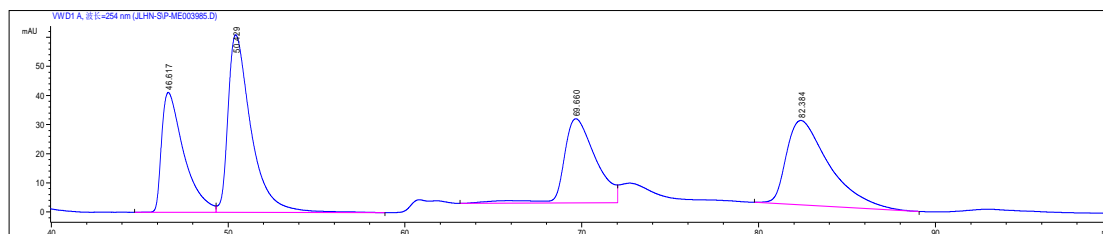

| Entry | Retention Time | Area   | Height | %Area  |
|-------|----------------|--------|--------|--------|
| 1     | 46.617         | 3605.8 | 41.2   | 20.753 |
| 2     | 50.429         | 5546.8 | 61     | 31.923 |
| 3     | 69.66          | 3345.3 | 28.4   | 19.253 |
| 4     | 82.385         | 4877.4 | 29     | 28.071 |

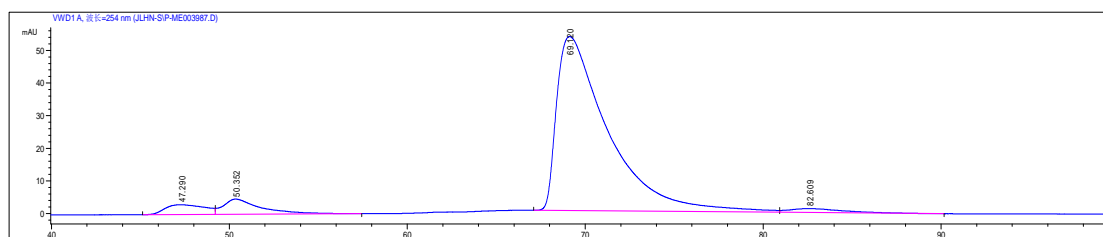

| Entry | Retention Time | Area    | Height | %Area  |
|-------|----------------|---------|--------|--------|
| 1     | 47.296         | 482.6   | 3      | 3.864  |
| 2     | 50.359         | 648.4   | 4.6    | 5.191  |
| 3     | 69.117         | 11103.3 | 53.9   | 88.890 |
| 4     | 82.662         | 256.7   | 1.2    | 2.055  |

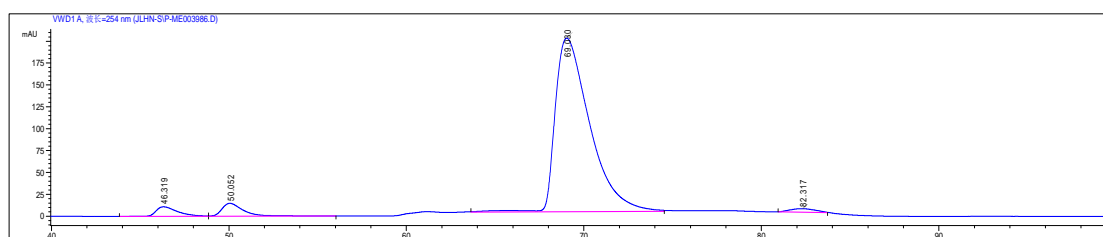

| Entry | Retention Time | Area    | Height | %Area  |
|-------|----------------|---------|--------|--------|
| 1     | 46.319         | 877.1   | 10.8   | 2.988  |
| 2     | 50.052         | 1214.8  | 14.6   | 4.139  |
| 3     | 69.03          | 26849.4 | 198.4  | 91.484 |
| 4     | 82.317         | 407.5   | 4      | 1.389  |

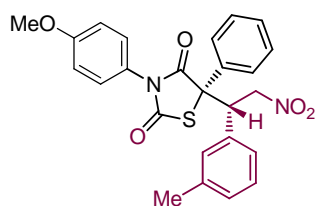

7m

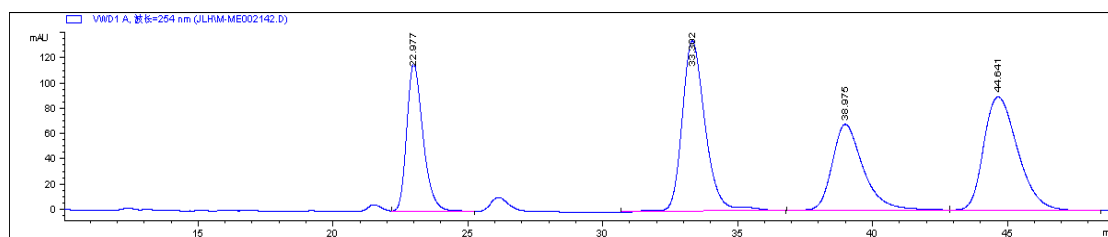

| Entry | Retention Time | Area   | Height | %Area  |
|-------|----------------|--------|--------|--------|
| 1     | 22.977         | 4972.2 | 117.3  | 19.287 |
| 2     | 33.302         | 7568.8 | 133.4  | 29.359 |
| 3     | 38.974         | 5405.4 | 68     | 20.967 |
| 4     | 44.641         | 7833.7 | 89.7   | 30.387 |

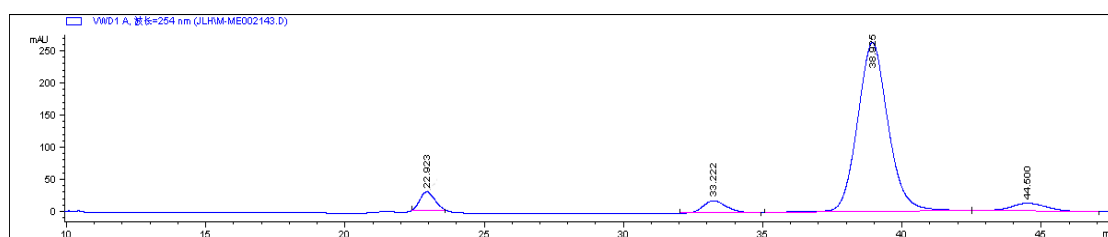

| Entry | Retention Time | Area   | Height | %Area  |
|-------|----------------|--------|--------|--------|
| 1     | 22.922         | 1111.4 | 29.3   | 4.756  |
| 2     | 33.225         | 1121.1 | 19     | 4.798  |
| 3     | 38.925         | 20090  | 262.8  | 85.974 |
| 4     | 44.499         | 1045   | 12     | 4.472  |

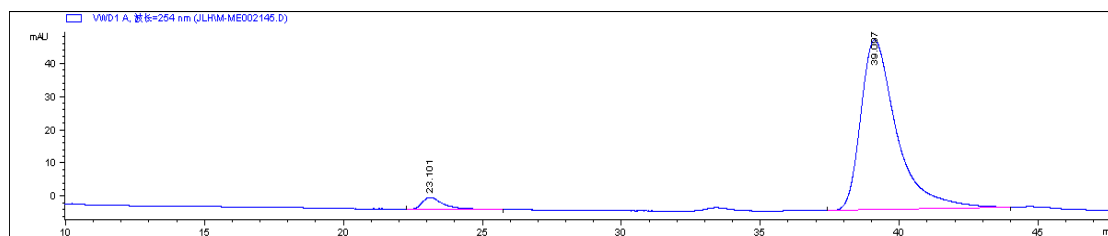

| Entry | Retention Time | Area   | Height | %Area  |
|-------|----------------|--------|--------|--------|
| 1     | 23.107         | 170.6  | 3.6    | 3.532  |
| 2     | 33.407         | 64.5   | 1.1    | 1.336  |
| 3     | 39.097         | 4595.1 | 51.2   | 95.132 |

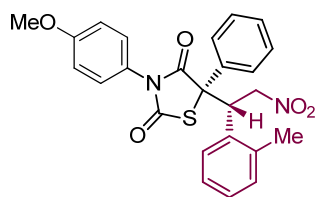

7n

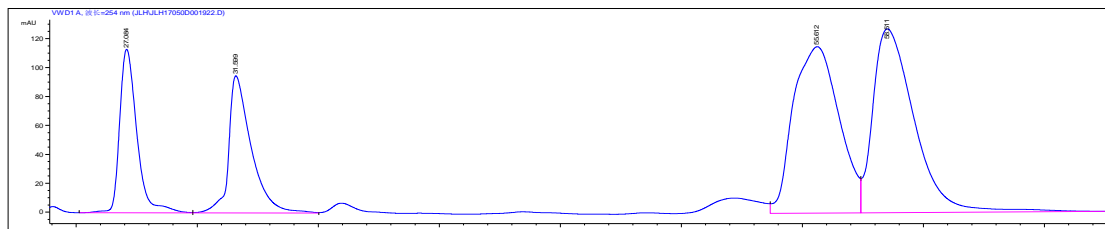

| Entry | Retention Time | Area   | Height | %Area  |
|-------|----------------|--------|--------|--------|
| 1     | 27.083         | 5569   | 112.9  | 13.557 |
| 2     | 31.594         | 6027.9 | 94.5   | 14.674 |
| 3     | 55.612         | 15076  | 114.6  | 36.700 |
| 4     | 58.511         | 14406  | 126.3  | 35.069 |

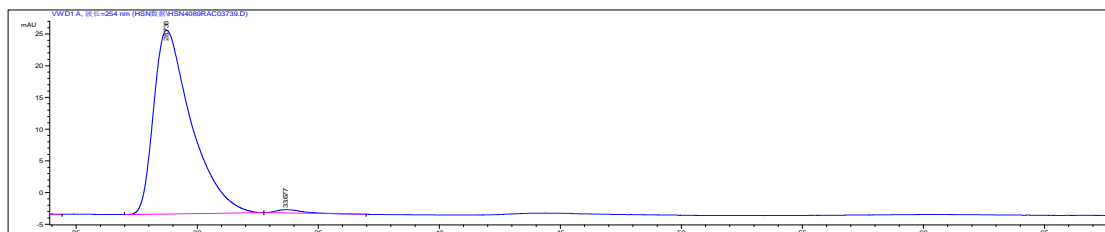

| Entry | Retention Time | Area   | Height | %Area  |
|-------|----------------|--------|--------|--------|
| 1     | 28.737         | 3126.6 | 29     | 98.874 |
| 2     | 33.711         | 35.6   | 5.2E-1 | 1.126  |

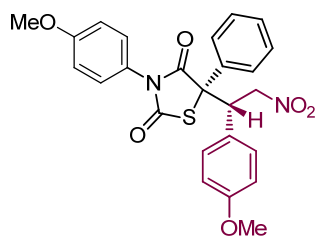

7o

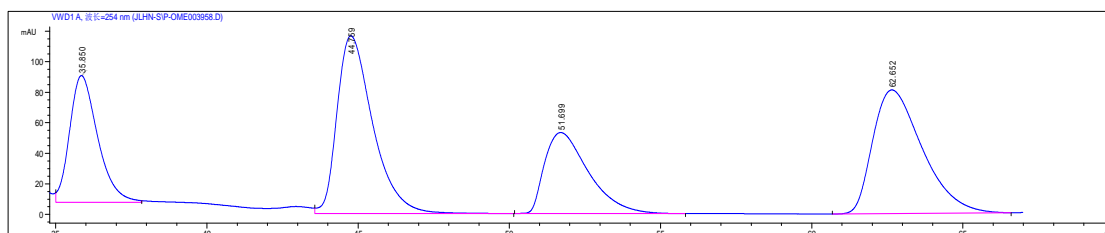

| Entry | Retention Time | Area   | Height | %Area  |
|-------|----------------|--------|--------|--------|
| 1     | 35.85          | 5476.4 | 84.8   | 18.778 |
| 2     | 44.759         | 9117.2 | 114.4  | 31.262 |
| 3     | 51.698         | 5344   | 53     | 18.324 |
| 4     | 62.651         | 9226.4 | 81     | 31.636 |

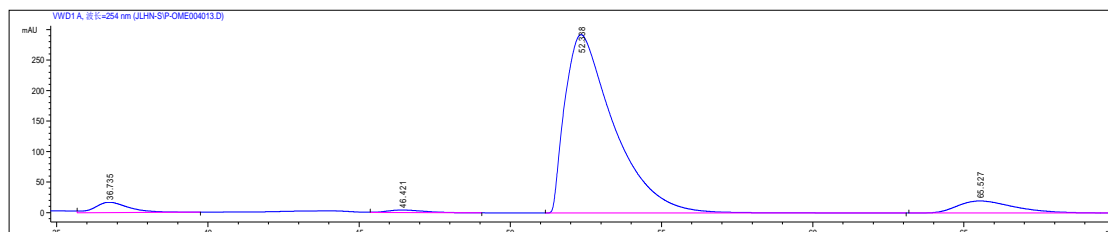

| Entry | Retention Time | Area   | Height | %Area  |
|-------|----------------|--------|--------|--------|
| 1     | 36.735         | 1293.1 | 16.9   | 3.488  |
| 2     | 46.425         | 374.4  | 4.3    | 1.010  |
| 3     | 52.337         | 32834  | 292.2  | 88.561 |
| 4     | 65.528         | 2573.7 | 19.7   | 6.942  |

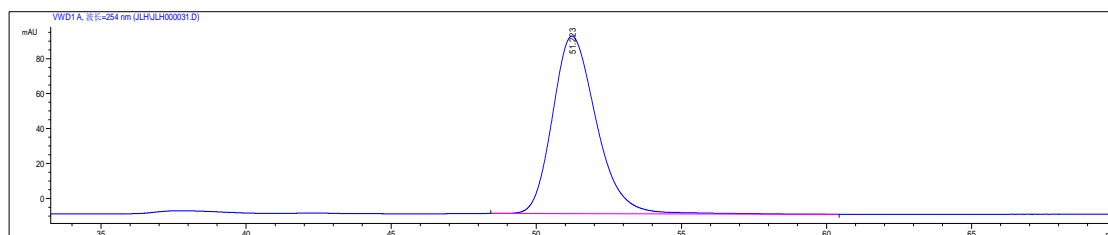

| Entry | Retention Time | Area    | Height | %Area   |
|-------|----------------|---------|--------|---------|
| 1     | 51.222         | 10654.8 | 101.5  | 100.000 |

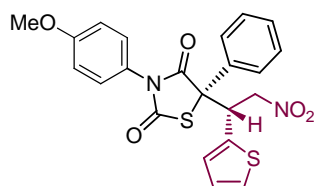

7p

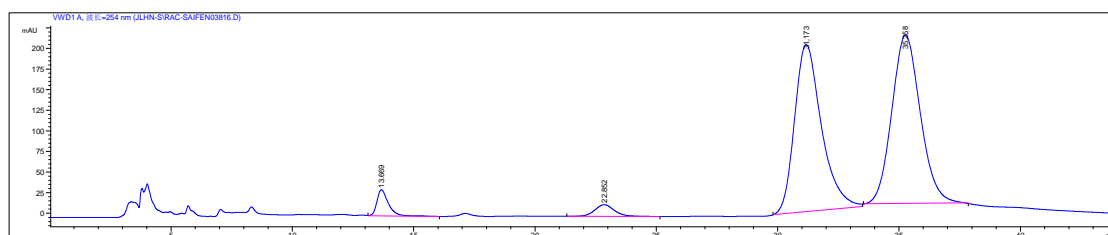



| Entry | Retention Time | Area    | Height | %Area  |
|-------|----------------|---------|--------|--------|
| 1     | 13.669         | 1047.7  | 31.7   | 3.069  |
| 2     | 22.852         | 796.8   | 14.1   | 2.334  |
| 3     | 31.173         | 15624.2 | 202.8  | 45.769 |
| 4     | 35.258         | 16668   | 204.3  | 48.827 |

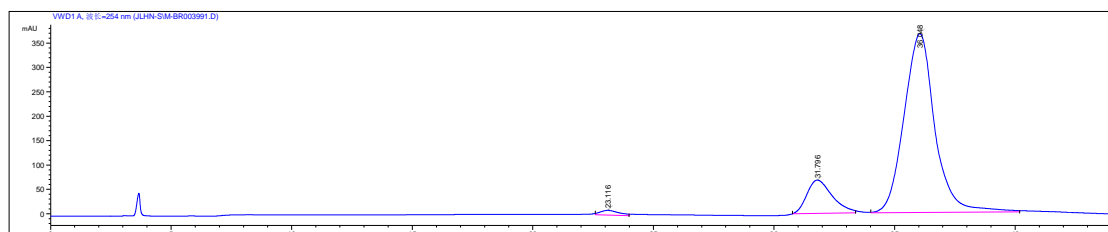

| Entry | Retention Time | Area    | Height | %Area  |
|-------|----------------|---------|--------|--------|
| 1     | 23.116         | 506.3   | 9.5    | 1.328  |
| 2     | 31.796         | 4976    | 68.2   | 13.052 |
| 3     | 36.048         | 32641.1 | 366.9  | 85.619 |

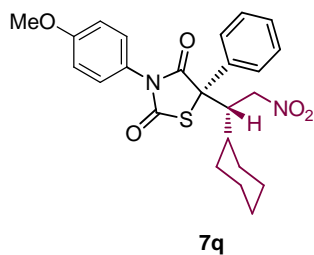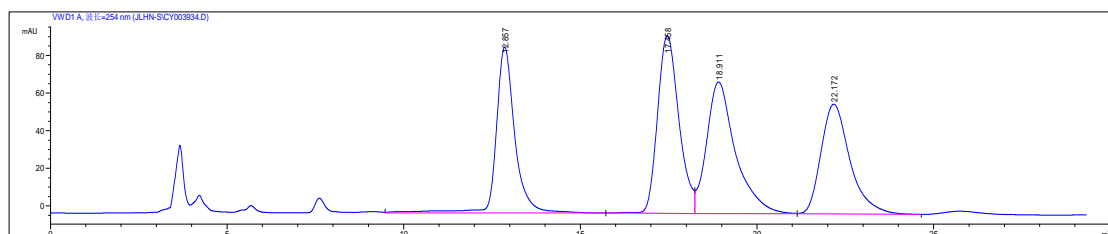

| Entry | Retention Time | Area   | Height | %Area  |
|-------|----------------|--------|--------|--------|
| 1     | 12.857         | 3269.1 | 88.2   | 22.492 |
| 2     | 17.458         | 3966.3 | 94.4   | 27.288 |
| 3     | 18.911         | 3969.5 | 70     | 27.310 |
| 4     | 22.172         | 3329.9 | 58.4   | 22.910 |

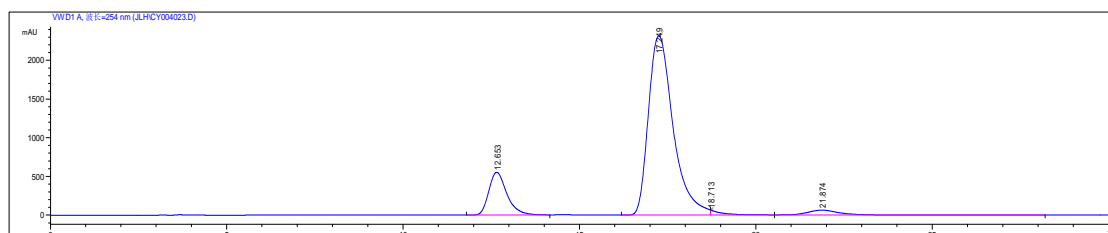

| Entry | Retention Time | Area     | Height | %Area  |
|-------|----------------|----------|--------|--------|
| 1     | 12.653         | 19690.8  | 552.4  | 14.272 |
| 2     | 17.249         | 112721.4 | 2315.1 | 81.703 |
| 3     | 18.713         | 1494.2   | 65.3   | 1.083  |
| 4     | 21.874         | 4057.9   | 63.3   | 2.941  |

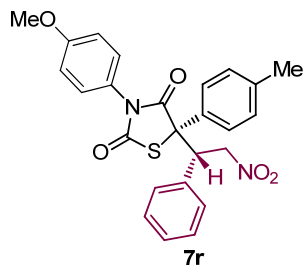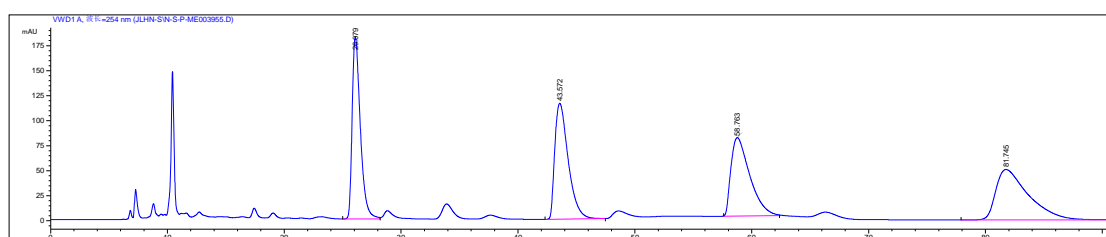

| Entry | Retention Time | Area   | Height | %Area  |
|-------|----------------|--------|--------|--------|
| 1     | 26.079         | 8863.5 | 181.9  | 24.246 |
| 2     | 43.572         | 9218.6 | 115.8  | 25.217 |
| 3     | 58.763         | 8777.6 | 78.5   | 24.011 |
| 4     | 81.745         | 9697.4 | 50.3   | 26.527 |

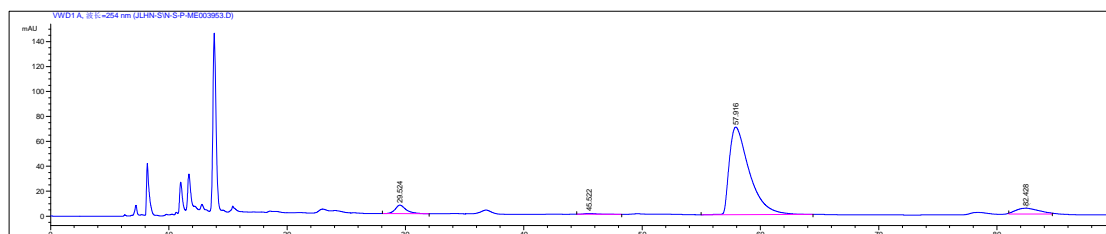

| Entry | Retention Time | Area   | Height | %Area  |
|-------|----------------|--------|--------|--------|
| 1     | 29.524         | 443.8  | 6.8    | 4.753  |
| 2     | 45.522         | 58.1   | 6.6E-1 | 0.622  |
| 3     | 57.916         | 8235.2 | 70.3   | 88.209 |
| 4     | 82.428         | 598.9  | 4.5    | 6.415  |

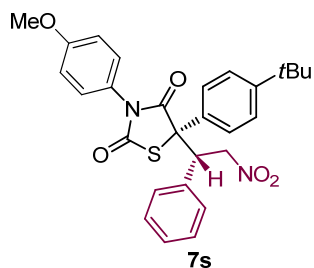

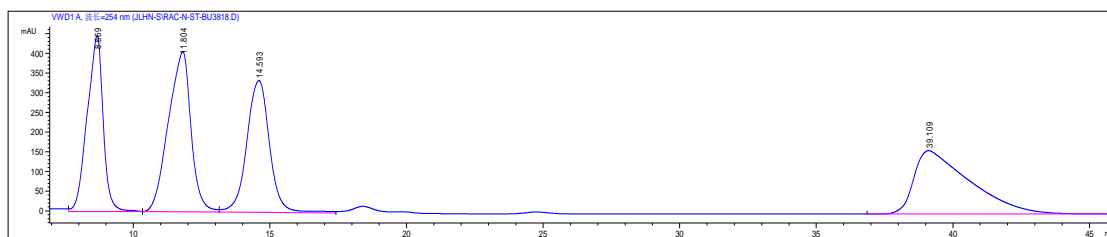

| Entry | Retention Time | Area    | Height | %Area  |
|-------|----------------|---------|--------|--------|
| 1     | 8.673          | 18117.9 | 446.4  | 21.873 |
| 2     | 11.808         | 23205.4 | 405.9  | 28.015 |
| 3     | 14.595         | 18778   | 332.5  | 22.670 |
| 4     | 39.107         | 22731.3 | 160.7  | 27.443 |

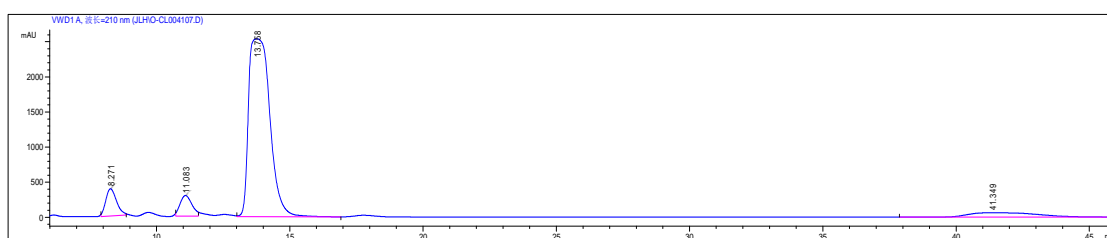

| Entry | Retention Time | Area     | Height | %Area  |
|-------|----------------|----------|--------|--------|
| 1     | 8.271          | 10861.8  | 388.5  | 6.616  |
| 2     | 11.083         | 9052.5   | 292.7  | 5.514  |
| 3     | 13.752         | 140428.5 | 2535   | 85.540 |
| 4     | 41.334         | 3823.8   | 31.5   | 2.329  |

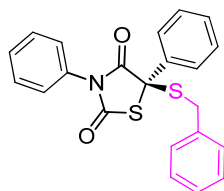

9a

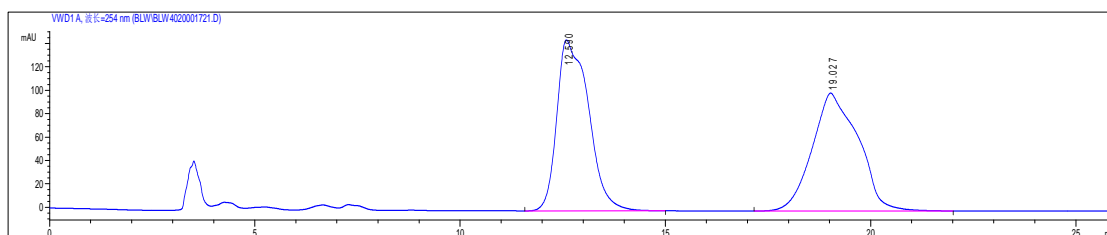

| Entry | Retention Time | Area   | Height | %Area  |
|-------|----------------|--------|--------|--------|
| 1     | 12.59          | 7846.6 | 146.2  | 49.911 |
| 2     | 19.027         | 7874.4 | 100.8  | 50.089 |

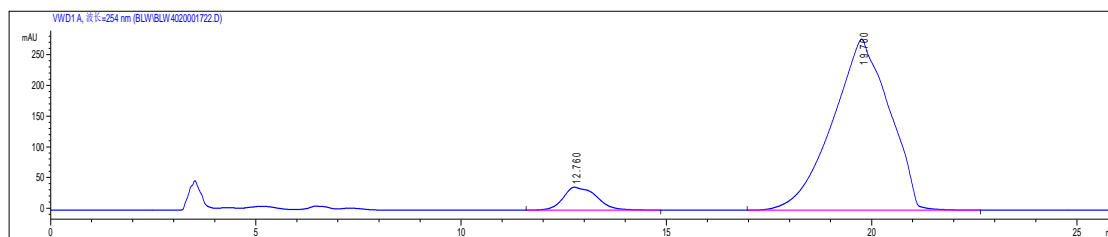

| Entry | Retention Time | Area    | Height | %Area  |
|-------|----------------|---------|--------|--------|
| 1     | 12.76          | 1874.8  | 37.3   | 6.533  |
| 2     | 19.76          | 26823.1 | 278.9  | 93.467 |

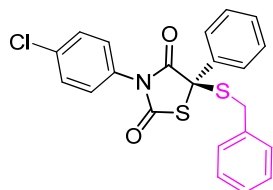

9b

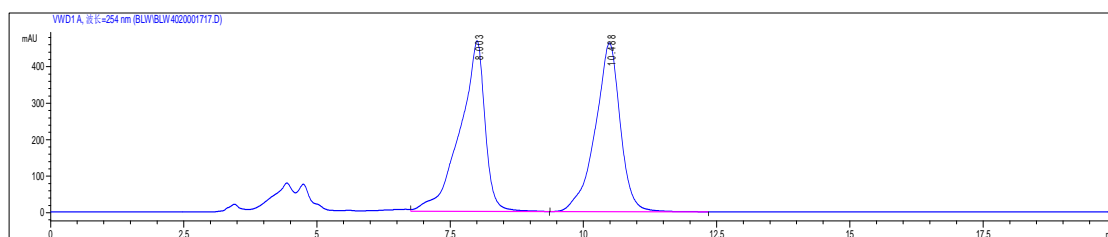

| Entry | Retention Time | Area    | Height | %Area  |
|-------|----------------|---------|--------|--------|
| 1     | 8.003          | 15242.3 | 467.3  | 50.247 |
| 2     | 10.488         | 15092.6 | 462.5  | 49.753 |

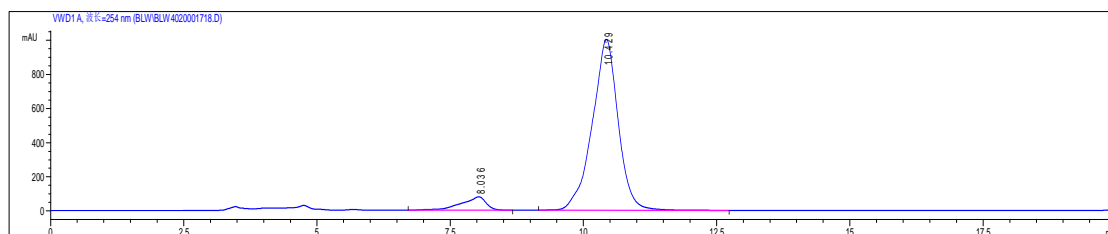

| Entry | Retention Time | Area    | Height | %Area  |
|-------|----------------|---------|--------|--------|
| 1     | 8.036          | 2110.9  | 78.9   | 5.862  |
| 2     | 10.429         | 33897.5 | 1001.9 | 94.138 |

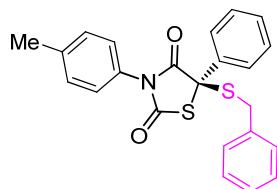

9c

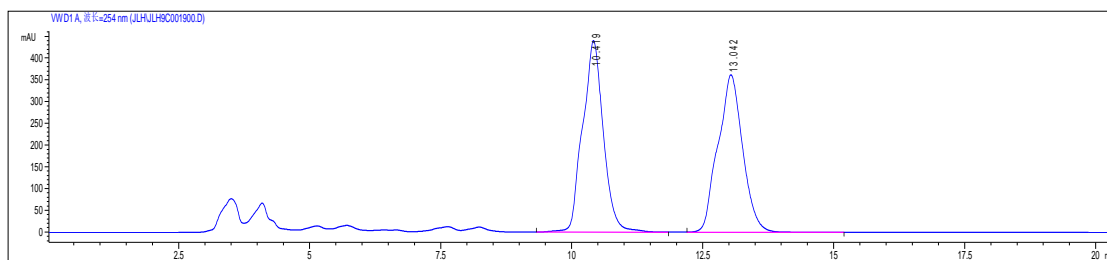

| Entry | Retention Time | Area    | Height | %Area  |
|-------|----------------|---------|--------|--------|
| 1     | 10.419         | 12155.5 | 440.4  | 50.579 |
| 2     | 13.042         | 11877.2 | 361.9  | 49.421 |

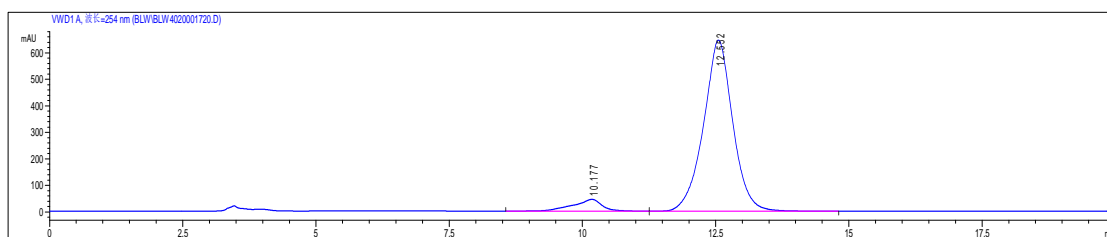

| Entry | Retention Time | Area    | Height | %Area  |
|-------|----------------|---------|--------|--------|
| 1     | 10.177         | 1278.9  | 45.1   | 4.945  |
| 2     | 12.552         | 24585.1 | 646.1  | 95.055 |

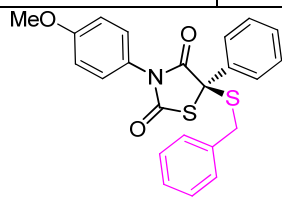

9d

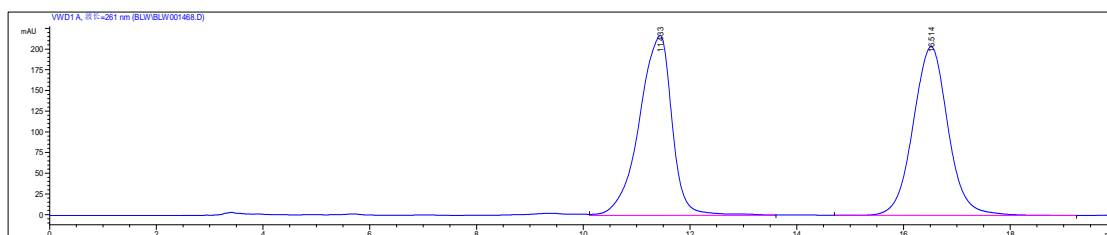

| Entry | Retention Time | Area   | Height | %Area  |
|-------|----------------|--------|--------|--------|
| 1     | 11.433         | 9246.7 | 217.4  | 50.000 |
| 2     | 16.514         | 9246.8 | 203.6  | 50.000 |

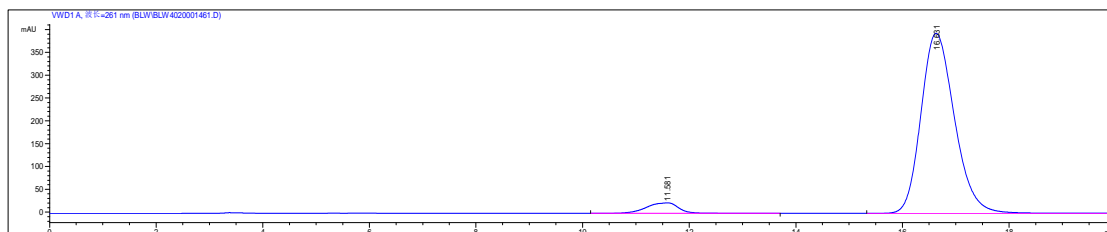

| Entry | Retention Time | Area    | Height | %Area  |
|-------|----------------|---------|--------|--------|
| 1     | 11.589         | 806     | 21.7   | 4.480  |
| 2     | 16.631         | 17186.6 | 394.2  | 95.520 |

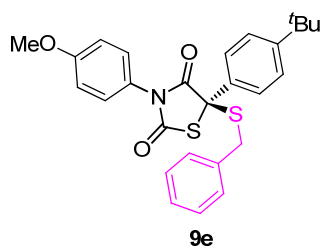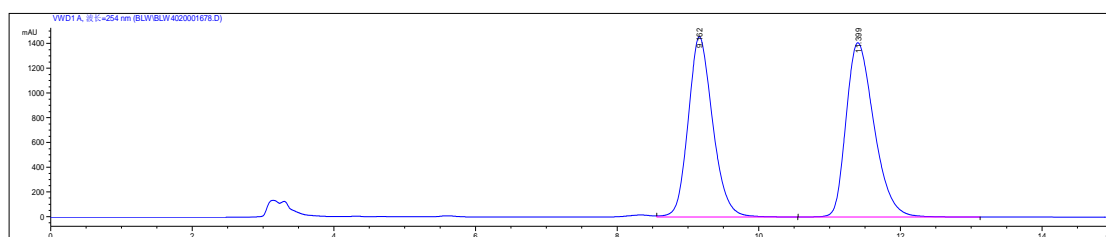

| Entry | Retention Time | Area    | Height | %Area  |
|-------|----------------|---------|--------|--------|
| 1     | 9.162          | 11501   | 342.4  | 50.431 |
| 2     | 11.399         | 11304.4 | 285.5  | 49.569 |

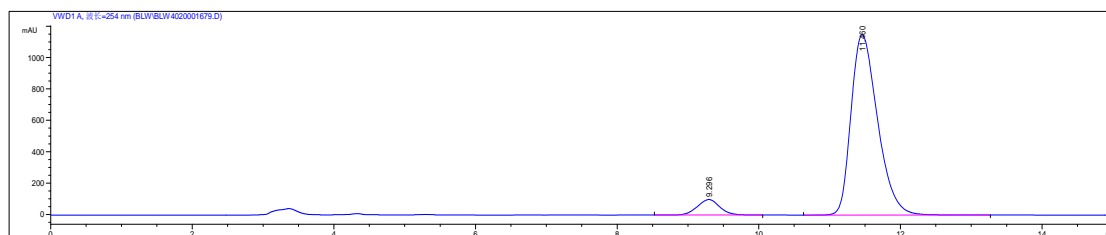

| Entry | Retention Time | Area    | Height | %Area  |
|-------|----------------|---------|--------|--------|
| 1     | 9.296          | 2150    | 98.5   | 6.713  |
| 2     | 11.46          | 29877.9 | 1149.8 | 93.287 |

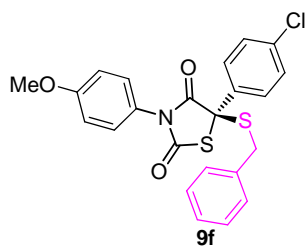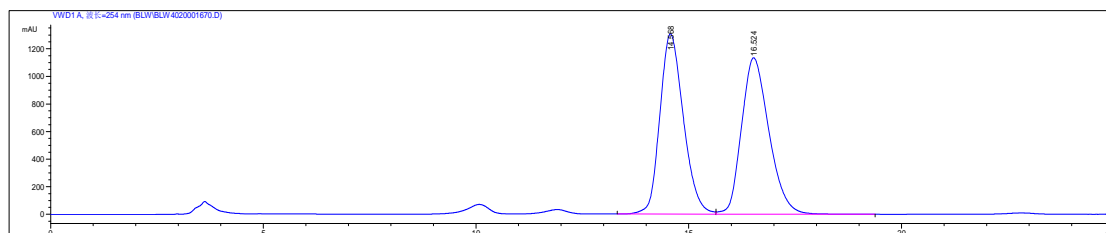

| Entry | Retention Time | Area    | Height | %Area  |
|-------|----------------|---------|--------|--------|
| 1     | 14.568         | 50132.8 | 1306.6 | 49.719 |
| 2     | 16.524         | 50700   | 1134.2 | 50.281 |

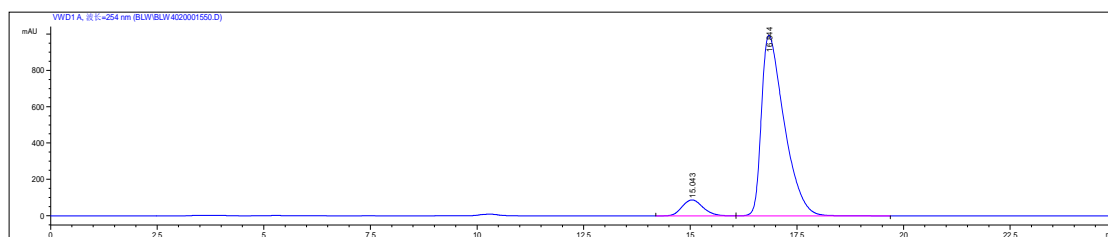

| Entry | Retention Time | Area    | Height | %Area  |
|-------|----------------|---------|--------|--------|
| 1     | 15.043         | 2494.2  | 81     | 6.359  |
| 2     | 16.844         | 36728.1 | 993.5  | 93.641 |

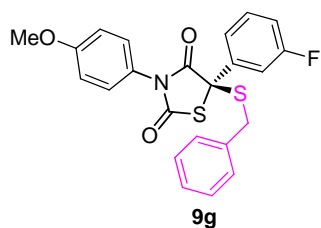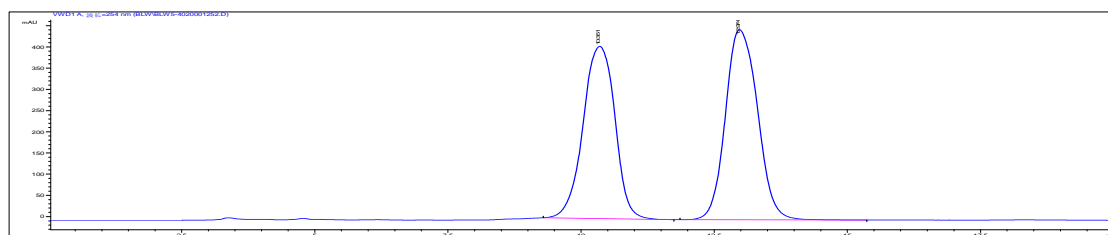

| Entry | Retention Time | Area    | Height | %Area  |
|-------|----------------|---------|--------|--------|
| 1     | 10.351         | 16888.9 | 406.2  | 47.298 |
| 2     | 12.974         | 18818.3 | 448.5  | 52.702 |

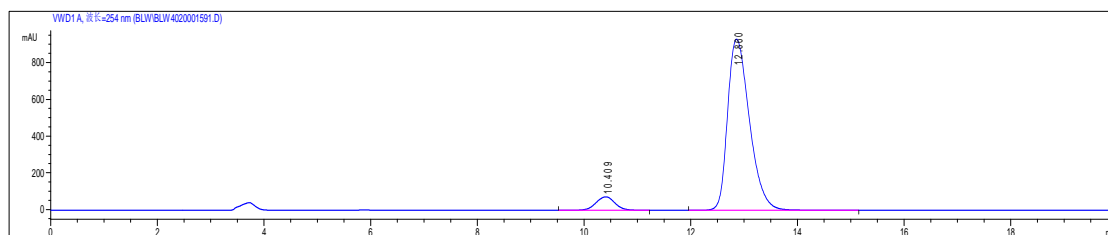

| Entry | Retention Time | Area    | Height | %Area  |
|-------|----------------|---------|--------|--------|
| 1     | 10.409         | 1596.2  | 73.9   | 5.676  |
| 2     | 12.86          | 26526.6 | 933    | 94.324 |

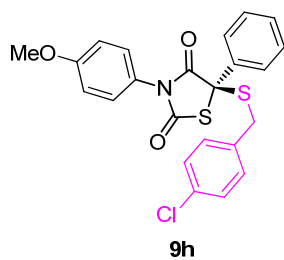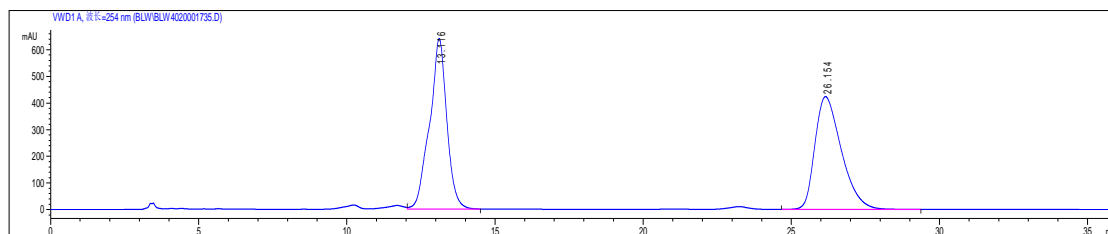

| Entry | Retention Time | Area    | Height | %Area  |
|-------|----------------|---------|--------|--------|
| 1     | 13.116         | 25873.7 | 641.1  | 49.593 |
| 2     | 26.154         | 26298   | 423.7  | 50.407 |

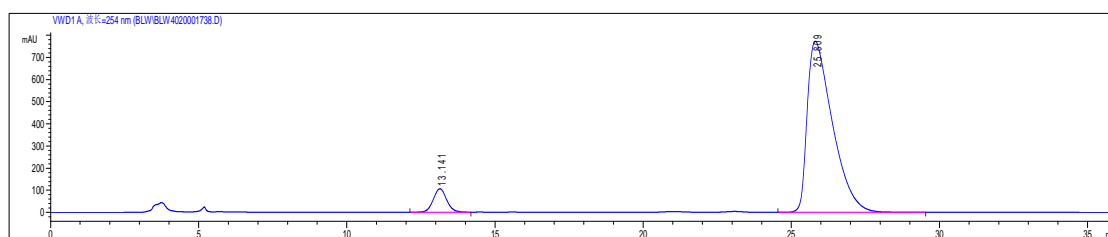

| Entry | Retention Time | Area   | Height | %Area  |
|-------|----------------|--------|--------|--------|
| 1     | 13.141         | 3003.9 | 106.4  | 6.159  |
| 2     | 25.809         | 45767  | 773.3  | 93.841 |

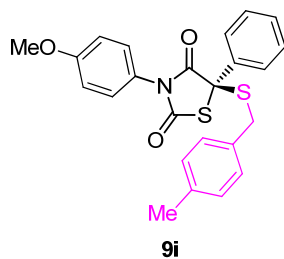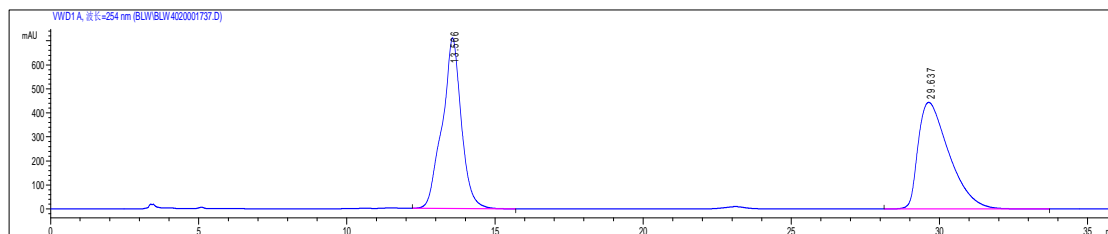

| Entry | Retention Time | Area    | Height | %Area  |
|-------|----------------|---------|--------|--------|
| 1     | 13.566         | 31740.1 | 710.4  | 49.688 |
| 2     | 29.637         | 32138.4 | 443.8  | 50.312 |



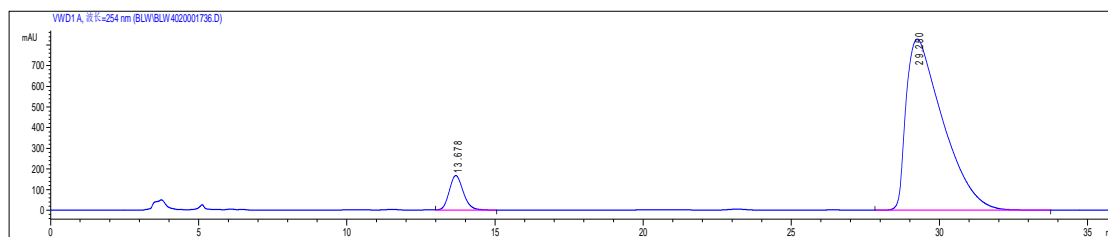

| Entry | Retention Time | Area    | Height | %Area  |
|-------|----------------|---------|--------|--------|
| 1     | 13.678         | 4848.7  | 167.4  | 6.374  |
| 2     | 29.25          | 71225.2 | 828.3  | 93.626 |

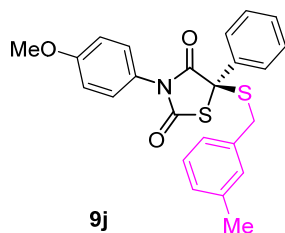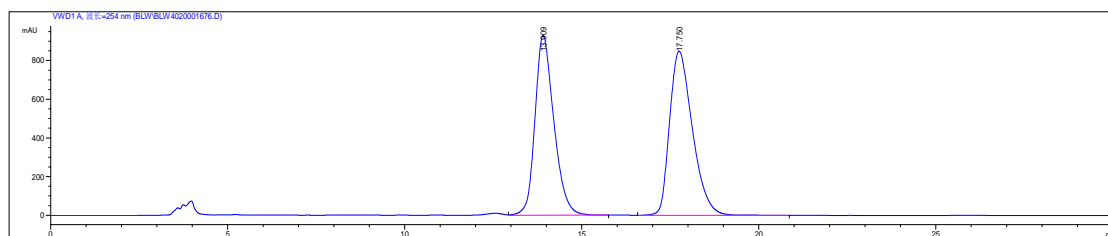

| Entry | Retention Time | Area    | Height | %Area  |
|-------|----------------|---------|--------|--------|
| 1     | 13.909         | 34482.1 | 931.7  | 47.614 |
| 2     | 17.75          | 37937.8 | 848.7  | 52.386 |

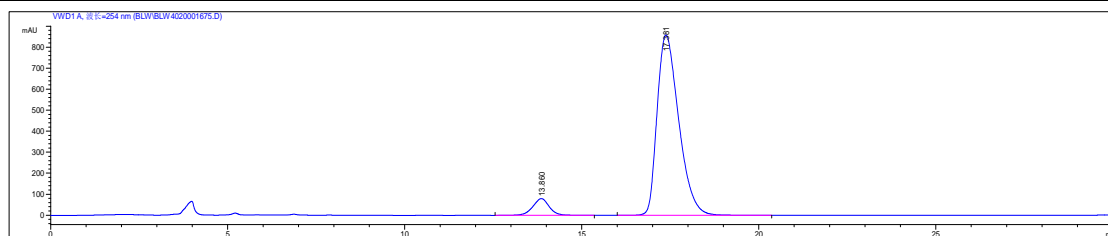

| Entry | Retention Time | Area    | Height | %Area  |
|-------|----------------|---------|--------|--------|
| 1     | 13.86          | 2170.4  | 74.7   | 5.629  |
| 2     | 17.381         | 36384.9 | 859    | 94.371 |

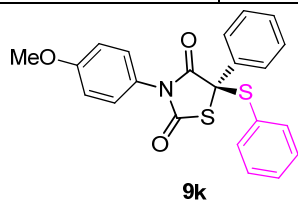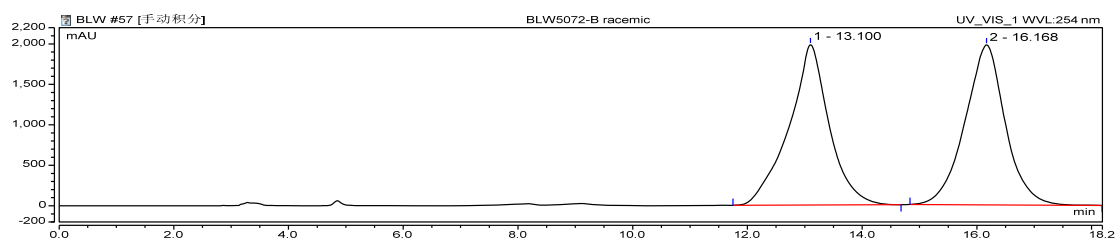

| Entry | Retention Time | Area      | Height  | %Area |
|-------|----------------|-----------|---------|-------|
| 1     | 13.100         | 1607.3926 | 1980.46 | 50.02 |
| 2     | 16.168         | 1606.1558 | 1976.27 | 49.98 |

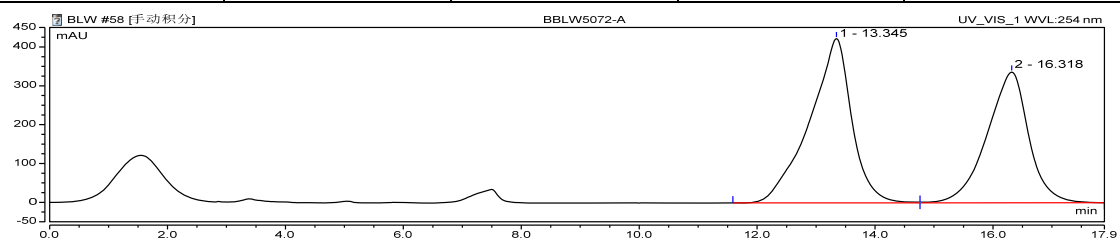

| Entry | Retention Time | Area     | Height | %Area |
|-------|----------------|----------|--------|-------|
| 1     | 13.345         | 349.7697 | 422.62 | 55.96 |
| 2     | 16.318         | 275.3053 | 336.15 | 44.04 |

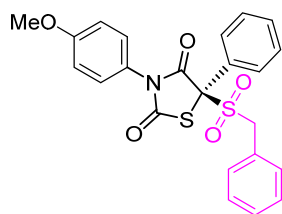

10

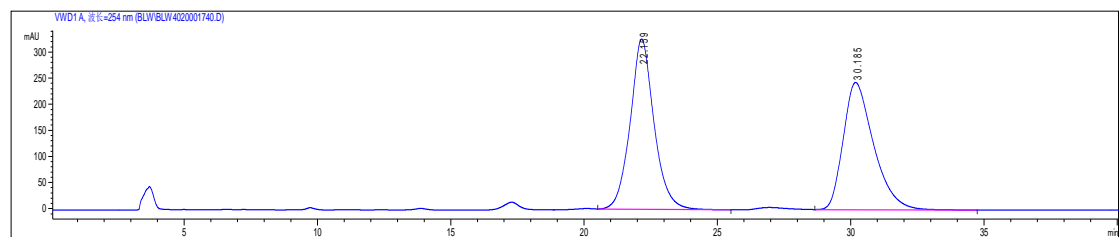

| Entry | Retention Time | Area   | Height | %Area  |
|-------|----------------|--------|--------|--------|
| 1     | 22.159         | 5794.9 | 96.5   | 52.668 |
| 2     | 30.185         | 5207.7 | 82.7   | 47.332 |

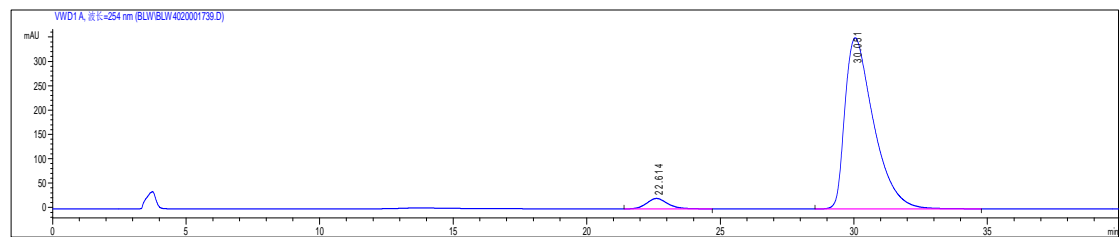

| Entry | Retention Time | Area    | Height | %Area  |
|-------|----------------|---------|--------|--------|
| 1     | 22.614         | 1179.6  | 21.4   | 4.309  |
| 2     | 30.051         | 26198.3 | 351.9  | 95.691 |

### 3. Determination of the absolute configuration by X-ray crystallography

1) Absolute configurations of **7** and the derivative **10** are determined by X-ray structure analysis of the product **7f** (CCDC1430350).

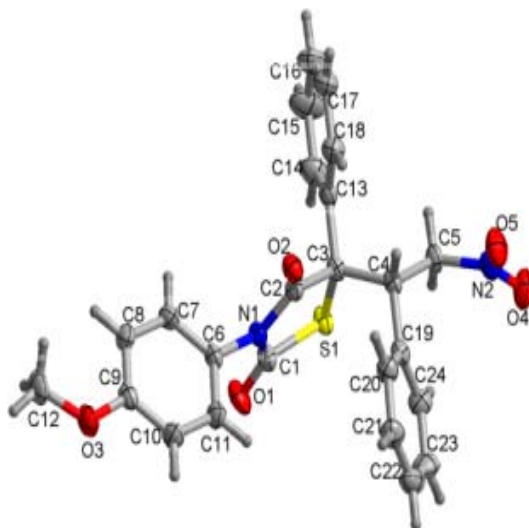

Displacement ellipsoids are drawn at the 30% probability level.

**Table 1** Crystal data and structure refinement for JLH06047.

|                                    |                                                                 |
|------------------------------------|-----------------------------------------------------------------|
| Identification code                | JLH06047                                                        |
| Empirical formula                  | C <sub>24</sub> H <sub>20</sub> N <sub>2</sub> O <sub>5</sub> S |
| Formula weight                     | 448.48                                                          |
| Temperature/K                      | 291.15                                                          |
| Crystal system                     | orthorhombic                                                    |
| Space group                        | P2 <sub>1</sub> 2 <sub>1</sub> 2 <sub>1</sub>                   |
| a/Å                                | 8.6723(2)                                                       |
| b/Å                                | 16.0081(4)                                                      |
| c/Å                                | 16.3709(3)                                                      |
| α/°                                | 90                                                              |
| β/°                                | 90                                                              |
| γ/°                                | 90                                                              |
| Volume/Å <sup>3</sup>              | 2272.72(9)                                                      |
| Z                                  | 4                                                               |
| ρ <sub>calc</sub> /cm <sup>3</sup> | 1.311                                                           |
| μ/mm <sup>-1</sup>                 | 1.585                                                           |
| F(000)                             | 936.0                                                           |
| Crystal size/mm <sup>3</sup>       | 0.19 × 0.17 × 0.16                                              |
| Radiation                          | CuKα (λ = 1.54184)                                              |
| 2θ range for data collection/°     | 7.724 to 134.158                                                |
| Index ranges                       | -5 ≤ h ≤ 10, -19 ≤ k ≤ 19, -19 ≤ l ≤ 19                         |
| Reflections collected              | 8203                                                            |

|                                                |                                                                  |
|------------------------------------------------|------------------------------------------------------------------|
| Independent reflections                        | 4076 [ $R_{\text{int}} = 0.0282$ , $R_{\text{sigma}} = 0.0382$ ] |
| Data/restraints/parameters                     | 4076/0/290                                                       |
| Goodness-of-fit on $F^2$                       | 1.017                                                            |
| Final R indexes [ $I \geq 2\sigma(I)$ ]        | $R_1 = 0.0378$ , $wR_2 = 0.0914$                                 |
| Final R indexes [all data]                     | $R_1 = 0.0447$ , $wR_2 = 0.0958$                                 |
| Largest diff. peak/hole / $e \text{ \AA}^{-3}$ | 0.15/-0.15                                                       |
| Flack parameter                                | 0.025(14)                                                        |

**Table 2 Fractional Atomic Coordinates ( $\times 10^4$ ) and Equivalent Isotropic Displacement Parameters ( $\text{\AA}^2 \times 10^3$ ) for JLH06047.  $U_{\text{eq}}$  is defined as 1/3 of the trace of the orthogonalised  $U_{ij}$  tensor.**

| Atom | x       | y          | z           | $U_{\text{eq}}$ |
|------|---------|------------|-------------|-----------------|
| C1   | 2572(4) | 5049(2)    | 1720.3(18)  | 48.7(7)         |
| C2   | 3862(3) | 3907.4(18) | 2327.8(18)  | 40.5(6)         |
| C3   | 3347(4) | 4359.9(19) | 3112.3(17)  | 40.8(7)         |
| C4   | 4812(4) | 4571(2)    | 3627.1(17)  | 41.9(7)         |
| C5   | 4318(4) | 4980(2)    | 4423.6(19)  | 50.6(8)         |
| C6   | 3619(4) | 3929.4(19) | 835.0(17)   | 43.6(7)         |
| C7   | 2674(5) | 3303(2)    | 565.3(19)   | 52.2(8)         |
| C8   | 2909(5) | 2942(2)    | -197(2)     | 54.6(9)         |
| C9   | 4124(5) | 3218(2)    | -671.6(19)  | 50.1(8)         |
| C10  | 5074(5) | 3849(3)    | -396(2)     | 60.3(10)        |
| C11  | 4825(5) | 4206(3)    | 363(2)      | 58.5(9)         |
| C12  | 3435(7) | 2334(3)    | -1786(2)    | 82.7(15)        |
| C13  | 2242(4) | 3776(2)    | 3581.9(17)  | 45.7(7)         |
| C14  | 729(5)  | 3979(3)    | 3738(3)     | 73.1(12)        |
| C15  | -221(6) | 3429(4)    | 4152(3)     | 98.8(18)        |
| C16  | 326(6)  | 2667(4)    | 4403(3)     | 88.1(15)        |
| C17  | 1826(6) | 2459(3)    | 4255(2)     | 71.0(11)        |
| C18  | 2780(5) | 3005(2)    | 3844(2)     | 56.2(9)         |
| C19  | 6014(4) | 5064.5(19) | 3157.8(17)  | 41.8(7)         |
| C20  | 7131(4) | 4637(2)    | 2724(2)     | 52.6(8)         |
| C21  | 8234(4) | 5056(3)    | 2268(3)     | 65.1(10)        |
| C22  | 8261(5) | 5906(3)    | 2261(3)     | 69.6(11)        |
| C23  | 7180(5) | 6346(2)    | 2699(3)     | 71.0(11)        |
| C24  | 6051(4) | 5934(2)    | 3144(2)     | 55.8(9)         |
| N1   | 3344(3) | 4294.8(16) | 1626.9(15)  | 44.0(6)         |
| N2   | 5682(4) | 5125(2)    | 4963.8(17)  | 55.8(7)         |
| O1   | 2072(4) | 5467.6(17) | 1173.9(14)  | 71.8(8)         |
| O2   | 4618(3) | 3277.5(14) | 2327.7(13)  | 51.7(6)         |
| O3   | 4464(4) | 2909.1(17) | -1424.9(15) | 67.8(8)         |
| O4   | 5797(4) | 5792(2)    | 5298(2)     | 89.6(10)        |

|    |            |           |            |         |
|----|------------|-----------|------------|---------|
| O5 | 6611(4)    | 4566(2)   | 5045.2(18) | 82.9(9) |
| S1 | 2394.4(10) | 5313.8(5) | 2758.0(5)  | 48.0(2) |

**Table 3 Anisotropic Displacement Parameters ( $\text{\AA}^2 \times 10^3$ ) for JLH06047. The Anisotropic displacement factor exponent takes the form:  $-2\pi^2[h^2a^{*2}U_{11}+2hka^*b^*U_{12}+\dots]$ .**

| Atom | $U_{11}$ | $U_{22}$ | $U_{33}$ | $U_{23}$  | $U_{13}$ | $U_{12}$           |
|------|----------|----------|----------|-----------|----------|--------------------|
| C1   | 53.2(18) | 55.3(17) | 37.7(14) | -2.2(13)  |          | -4.3(15) 2.7(16)   |
| C2   | 43.4(15) | 43.6(16) | 34.4(14) | -1.8(13)  |          | -0.3(13) -3.9(13)  |
| C3   | 44.4(17) | 45.5(16) | 32.4(14) | -1.0(12)  |          | -1.0(13) 4.4(14)   |
| C4   | 47.0(17) | 46.8(17) | 31.9(13) | -1.9(13)  |          | -2.4(13) 5.6(14)   |
| C5   | 51.9(18) | 64(2)    | 35.7(15) | -8.7(14)  |          | -1.0(14) 1.7(17)   |
| C6   | 50.3(17) | 48.7(17) | 31.9(14) | -2.2(13)  |          | -3.5(13) 3.1(15)   |
| C7   | 61(2)    | 54.1(18) | 41.6(15) | -0.8(14)  |          | 7.3(16) -8.2(18)   |
| C8   | 68(2)    | 48.6(18) | 47.7(18) | -7.2(14)  |          | -6.7(17) -9.3(17)  |
| C9   | 67(2)    | 48.0(18) | 35.4(15) | -3.3(13)  |          | -4.8(16) 6.3(16)   |
| C10  | 62(2)    | 74(2)    | 45.4(18) | -6.0(18)  |          | 9.0(17) -14(2)     |
| C11  | 63(2)    | 66(2)    | 46.9(18) | -11.7(17) |          | 2.2(17) -16.4(19)  |
| C12  | 135(4)   | 65(2)    | 48(2)    | -20.1(19) |          | -10(3) -5(3)       |
| C13  | 48.0(18) | 58.7(18) | 30.3(13) | -3.5(12)  |          | 0.8(13) -3.3(15)   |
| C14  | 62(2)    | 88(3)    | 69(3)    | 11(2)     |          | 15(2) 10(2)        |
| C15  | 64(3)    | 130(5)   | 102(4)   | 33(4)     |          | 33(3) 3(3)         |
| C16  | 86(3)    | 106(4)   | 73(3)    | 21(3)     |          | 19(3) -23(3)       |
| C17  | 88(3)    | 69(3)    | 57(2)    | 10.2(19)  |          | 1(2) -15(2)        |
| C18  | 59(2)    | 57.2(19) | 52.4(19) | 4.3(15)   |          | 0.5(17) -4.6(18)   |
| C19  | 44.5(16) | 47.7(16) | 33.1(13) | 0.9(12)   |          | -2.9(12) 4.2(14)   |
| C20  | 50.1(17) | 55.1(17) | 52.6(17) | -5.5(17)  |          | 4.0(16) 1.1(16)    |
| C21  | 50.1(19) | 87(3)    | 58(2)    | -5(2)     |          | 7.6(18) -2.9(19)   |
| C22  | 57(2)    | 87(3)    | 65(2)    | 19(2)     |          | 2(2) -11(2)        |
| C23  | 76(3)    | 52.5(19) | 85(3)    | 23(2)     |          | -8(3) -5.9(19)     |
| C24  | 55(2)    | 52.0(19) | 61(2)    | 1.4(16)   |          | -1.7(17) 4.9(17)   |
| N1   | 50.3(15) | 48.3(14) | 33.2(12) | -2.9(11)  |          | -2.8(11) 2.0(12)   |
| N2   | 66.5(19) | 66.3(19) | 34.6(13) | -5.6(13)  |          | -5.3(13) -0.2(16)  |
| O1   | 98(2)    | 73.8(17) | 43.4(13) | 5.2(12)   |          | -14.8(13) 27.1(16) |
| O2   | 64.4(14) | 48.1(12) | 42.6(11) | -3.7(10)  |          | 0.1(11) 12.3(11)   |
| O3   | 91(2)    | 71.6(17) | 41.2(13) | -16.0(12) |          | 4.9(14) 2.3(16)    |
| O4   | 101(2)   | 82(2)    | 86(2)    | -32.2(18) |          | -28.0(19) -1.2(19) |
| O5   | 89(2)    | 89(2)    | 70.8(18) | -5.9(17)  |          | -31.4(16) 21.9(19) |
| S1   | 54.4(4)  | 50.7(4)  | 38.8(3)  | -4.4(3)   |          | -4.4(4) 13.2(4)    |

**Table 4 Bond Lengths for JLH06047.**

| Atom | Atom | Length/ $\text{\AA}$ | Atom | Atom | Length/ $\text{\AA}$ |
|------|------|----------------------|------|------|----------------------|
| C1   | N1   | 1.390(4)             | C9   | O3   | 1.361(4)             |

|    |     |          |     |     |          |
|----|-----|----------|-----|-----|----------|
| C1 | O1  | 1.199(4) | C10 | C11 | 1.385(5) |
| C1 | S1  | 1.758(3) | C12 | O3  | 1.411(5) |
| C2 | C3  | 1.541(4) | C13 | C14 | 1.376(5) |
| C2 | N1  | 1.379(4) | C13 | C18 | 1.388(5) |
| C2 | O2  | 1.203(4) | C14 | C15 | 1.383(6) |
| C3 | C4  | 1.562(4) | C15 | C16 | 1.373(8) |
| C3 | C13 | 1.544(4) | C16 | C17 | 1.365(7) |
| C3 | S1  | 1.831(3) | C17 | C18 | 1.378(5) |
| C4 | C5  | 1.521(4) | C19 | C20 | 1.382(4) |
| C4 | C19 | 1.517(4) | C19 | C24 | 1.392(5) |
| C5 | N2  | 1.494(4) | C20 | C21 | 1.387(5) |
| C6 | C7  | 1.367(5) | C21 | C22 | 1.361(6) |
| C6 | C11 | 1.373(5) | C22 | C23 | 1.375(6) |
| C6 | N1  | 1.442(4) | C23 | C24 | 1.387(5) |
| C7 | C8  | 1.391(5) | N2  | O4  | 1.204(4) |
| C8 | C9  | 1.381(5) | N2  | O5  | 1.211(4) |
| C9 | C10 | 1.379(5) |     |     |          |

Table 5 Bond Angles for JLH06047.

| Atom | Atom | Atom | Angle/°    | Atom | Atom | Atom | Angle/°  |
|------|------|------|------------|------|------|------|----------|
| N1   | C1   | S1   | 111.0(2)   | C6   | C11  | C10  | 119.3(3) |
| O1   | C1   | N1   | 125.3(3)   | C14  | C13  | C3   | 122.8(3) |
| O1   | C1   | S1   | 123.7(3)   | C14  | C13  | C18  | 118.3(4) |
| N1   | C2   | C3   | 112.8(2)   | C18  | C13  | C3   | 118.9(3) |
| O2   | C2   | C3   | 123.5(3)   | C13  | C14  | C15  | 120.6(5) |
| O2   | C2   | N1   | 123.6(3)   | C16  | C15  | C14  | 120.5(5) |
| C2   | C3   | C4   | 108.4(2)   | C17  | C16  | C15  | 119.5(5) |
| C2   | C3   | C13  | 108.1(2)   | C16  | C17  | C18  | 120.3(5) |
| C2   | C3   | S1   | 105.00(19) | C17  | C18  | C13  | 120.8(4) |
| C4   | C3   | S1   | 111.0(2)   | C20  | C19  | C4   | 118.9(3) |
| C13  | C3   | C4   | 111.6(2)   | C20  | C19  | C24  | 118.0(3) |
| C13  | C3   | S1   | 112.5(2)   | C24  | C19  | C4   | 123.1(3) |
| C5   | C4   | C3   | 109.1(2)   | C19  | C20  | C21  | 121.4(3) |
| C19  | C4   | C3   | 113.5(2)   | C22  | C21  | C20  | 120.0(4) |
| C19  | C4   | C5   | 113.8(3)   | C21  | C22  | C23  | 119.7(4) |
| N2   | C5   | C4   | 110.6(3)   | C22  | C23  | C24  | 120.8(4) |
| C7   | C6   | C11  | 120.7(3)   | C23  | C24  | C19  | 120.1(4) |
| C7   | C6   | N1   | 119.2(3)   | C1   | N1   | C6   | 122.1(3) |
| C11  | C6   | N1   | 120.0(3)   | C2   | N1   | C1   | 117.1(2) |
| C6   | C7   | C8   | 120.5(3)   | C2   | N1   | C6   | 120.8(3) |
| C9   | C8   | C7   | 118.9(3)   | O4   | N2   | C5   | 118.1(3) |

|     |     |     |          |    |    |     |           |
|-----|-----|-----|----------|----|----|-----|-----------|
| C10 | C9  | C8  | 120.4(3) | O4 | N2 | O5  | 123.4(3)  |
| O3  | C9  | C8  | 123.9(3) | O5 | N2 | C5  | 118.5(3)  |
| O3  | C9  | C10 | 115.7(3) | C9 | O3 | C12 | 118.7(3)  |
| C9  | C10 | C11 | 120.2(4) | C1 | S1 | C3  | 93.77(14) |

**Table 6 Torsion Angles for JLH06047.**

| A   | B   | C   | D   | Angle/°   | A   | B   | C   | D   | Angle/°   |
|-----|-----|-----|-----|-----------|-----|-----|-----|-----|-----------|
| C2  | C3  | C4  | C5  | -177.3(3) | C13 | C3  | S1  | C1  | -113.3(2) |
| C2  | C3  | C4  | C19 | 54.8(3)   | C13 | C14 | C15 | C16 | -0.9(8)   |
| C2  | C3  | C13 | C14 | -117.9(4) | C14 | C13 | C18 | C17 | -0.4(5)   |
| C2  | C3  | C13 | C18 | 60.7(4)   | C14 | C15 | C16 | C17 | 1.2(9)    |
| C2  | C3  | S1  | C1  | 4.0(2)    | C15 | C16 | C17 | C18 | -1.1(8)   |
| C3  | C2  | N1  | C1  | 5.1(4)    | C16 | C17 | C18 | C13 | 0.7(6)    |
| C3  | C2  | N1  | C6  | -175.6(3) | C18 | C13 | C14 | C15 | 0.5(7)    |
| C3  | C4  | C5  | N2  | 175.2(3)  | C19 | C4  | C5  | N2  | -57.1(4)  |
| C3  | C4  | C19 | C20 | -89.5(3)  | C19 | C20 | C21 | C22 | 2.0(6)    |
| C3  | C4  | C19 | C24 | 90.7(4)   | C20 | C19 | C24 | C23 | 0.5(5)    |
| C3  | C13 | C14 | C15 | 179.1(4)  | C20 | C21 | C22 | C23 | -0.8(6)   |
| C3  | C13 | C18 | C17 | -179.0(3) | C21 | C22 | C23 | C24 | -0.5(6)   |
| C4  | C3  | C13 | C14 | 123.0(4)  | C22 | C23 | C24 | C19 | 0.7(6)    |
| C4  | C3  | C13 | C18 | -58.4(4)  | C24 | C19 | C20 | C21 | -1.8(5)   |
| C4  | C3  | S1  | C1  | 120.9(2)  | N1  | C1  | S1  | C3  | -1.6(3)   |
| C4  | C5  | N2  | O4  | 134.9(4)  | N1  | C2  | C3  | C4  | -124.4(3) |
| C4  | C5  | N2  | O5  | -45.3(4)  | N1  | C2  | C3  | C13 | 114.6(3)  |
| C4  | C19 | C20 | C21 | 178.4(3)  | N1  | C2  | C3  | S1  | -5.7(3)   |
| C4  | C19 | C24 | C23 | -179.8(3) | N1  | C6  | C7  | C8  | 179.8(3)  |
| C5  | C4  | C19 | C20 | 145.0(3)  | N1  | C6  | C11 | C10 | 180.0(4)  |
| C5  | C4  | C19 | C24 | -34.8(4)  | O1  | C1  | N1  | C2  | 178.9(4)  |
| C6  | C7  | C8  | C9  | 0.9(6)    | O1  | C1  | N1  | C6  | -0.3(5)   |
| C7  | C6  | C11 | C10 | 0.5(6)    | O1  | C1  | S1  | C3  | 177.7(4)  |
| C7  | C6  | N1  | C1  | -99.7(4)  | O2  | C2  | C3  | C4  | 56.5(4)   |
| C7  | C6  | N1  | C2  | 81.1(4)   | O2  | C2  | C3  | C13 | -64.6(4)  |
| C7  | C8  | C9  | C10 | -0.8(6)   | O2  | C2  | C3  | S1  | 175.1(3)  |
| C7  | C8  | C9  | O3  | 179.8(3)  | O2  | C2  | N1  | C1  | -175.7(3) |
| C8  | C9  | C10 | C11 | 0.6(6)    | O2  | C2  | N1  | C6  | 3.6(5)    |
| C8  | C9  | O3  | C12 | 6.8(5)    | O3  | C9  | C10 | C11 | 180.0(4)  |
| C9  | C10 | C11 | C6  | -0.4(6)   | S1  | C1  | N1  | C2  | -1.8(4)   |
| C10 | C9  | O3  | C12 | -172.6(4) | S1  | C1  | N1  | C6  | 178.9(3)  |
| C11 | C6  | C7  | C8  | -0.7(6)   | S1  | C3  | C4  | C5  | 67.9(3)   |
| C11 | C6  | N1  | C1  | 80.8(4)   | S1  | C3  | C4  | C19 | -60.0(3)  |
| C11 | C6  | N1  | C2  | -98.5(4)  | S1  | C3  | C13 | C14 | -2.5(4)   |

|               |          |               |          |
|---------------|----------|---------------|----------|
| C13 C3 C4 C5  | -58.4(3) | S1 C3 C13 C18 | 176.1(2) |
| C13 C3 C4 C19 | 173.7(3) |               |          |

**Table 7 Hydrogen Atom Coordinates ( $\text{\AA} \times 10^4$ ) and Isotropic Displacement Parameters ( $\text{\AA}^2 \times 10^3$ ) for JLH06047.**

| Atom | <i>x</i> | <i>y</i> | <i>z</i> | U(eq) |
|------|----------|----------|----------|-------|
| H4   | 5291     | 4037     | 3773     | 50    |
| H5A  | 3818     | 5509     | 4308     | 61    |
| H5B  | 3582     | 4624     | 4702     | 61    |
| H7   | 1869     | 3118     | 894      | 63    |
| H8   | 2260     | 2521     | -385     | 66    |
| H10  | 5883     | 4036     | -721     | 72    |
| H11  | 5468     | 4629     | 552      | 70    |
| H12A | 3802     | 2185     | -2320    | 124   |
| H12B | 2432     | 2584     | -1831    | 124   |
| H12C | 3371     | 1842     | -1452    | 124   |
| H14  | 342      | 4491     | 3564     | 88    |
| H15  | -1238    | 3577     | 4261     | 119   |
| H16  | -322     | 2294     | 4672     | 106   |
| H17  | 2207     | 1947     | 4433     | 85    |
| H18  | 3798     | 2854     | 3742     | 67    |
| H20  | 7142     | 4056     | 2738     | 63    |
| H21  | 8956     | 4756     | 1967     | 78    |
| H22  | 9008     | 6189     | 1961     | 84    |
| H23  | 7205     | 6927     | 2697     | 85    |
| H24  | 5319     | 6238     | 3433     | 67    |

### Experimental

The crystal was kept at 291.15 K during data collection. Using Olex2 [1], the structure was solved with the Superflip [2] structure solution program using Charge Flipping and refined with the ShelXL [3] refinement package using Least Squares minimisation.

1. Dolomanov, O.V., Bourhis, L.J., Gildea, R.J., Howard, J.A.K. & Puschmann, H. (2009), *J. Appl. Cryst.* 42, 339-341.
2. Palatinus, L. & Chapuis, G. (2007). *J. Appl. Cryst.*, 40, 786-790; Palatinus, L. & van der Lee, A. (2008). *J. Appl. Cryst.* 41, 975-984; Palatinus, L., Prathapa, S. J. & van Smaalen, S. (2012). *J. Appl. Cryst.* 45, 575-580.
3. Sheldrick, G.M. (2008). *Acta Cryst.* A64, 112-122.

**Crystal Data** for  $\text{C}_{24}\text{H}_{20}\text{N}_2\text{O}_5\text{S}$  ( $M=448.48$  g/mol): orthorhombic, space group  $\text{P2}_1\text{2}_1\text{2}_1$  (no. 19),  $a = 8.6723(2)$   $\text{\AA}$ ,  $b = 16.0081(4)$   $\text{\AA}$ ,  $c = 16.3709(3)$   $\text{\AA}$ ,  $V = 2272.72(9)$   $\text{\AA}^3$ ,  $Z = 4$ ,  $T = 291.15$  K,  $\mu(\text{CuK}\alpha) = 1.585$   $\text{mm}^{-1}$ ,  $D_{\text{calc}} = 1.311$   $\text{g/cm}^3$ , 8203 reflections measured ( $7.724^\circ \leq 2\theta \leq 134.158^\circ$ ), 4076 unique ( $R_{\text{int}} = 0.0282$ ,  $R_{\text{sigma}} = 0.0382$ ) which were used in all calculations. The final  $R_1$  was 0.0378 ( $I > 2\sigma(I)$ ) and  $wR_2$  was 0.0958 (all data).



**Refinement model description**

Number of restraints -0, number of constraints - unknown.

Details:

1. Fixed Uiso

At 1.2 times of:

All C(H) groups, All C(H,H) groups

At 1.5 times of:

All C(H,H,H) groups

2.a Ternary CH refined with riding coordinates:

C4(H4)

2.b Secondary CH2 refined with riding coordinates:

C5(H5A,H5B)

2.c Aromatic/amide H refined with riding coordinates:

C7(H7), C8(H8), C10(H10), C11(H11), C14(H14), C15(H15), C16(H16), C17(H17),

C18(H18), C20(H20), C21(H21), C22(H22), C23(H23), C24(H24)

2.d Idealised Me refined as rotating group:

C12(H12A,H12B,H12C)

2) Absolute configurations of **9** and the derivative **11** are determined by X-ray structure analysis of the product **11** (CCDC1489694).

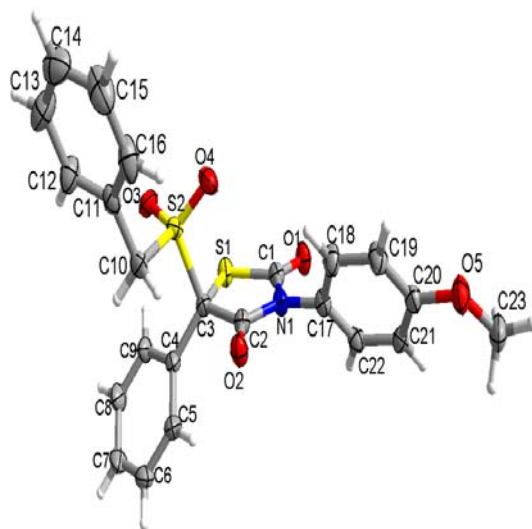

**Displacement ellipsoids are drawn at the 30% probability level.**

**Table 1 Crystal data and structure refinement for BLWyanghua.**

|                     |                                                                |
|---------------------|----------------------------------------------------------------|
| Identification code | BLWyanghua                                                     |
| Empirical formula   | C <sub>23</sub> H <sub>19</sub> NO <sub>5</sub> S <sub>2</sub> |
| Formula weight      | 453.51                                                         |
| Temperature/K       | 293(2)                                                         |
| Crystal system      | orthorhombic                                                   |
| Space group         | P2 <sub>1</sub> 2 <sub>1</sub> 2 <sub>1</sub>                  |
| a/Å                 | 8.62184(14)                                                    |

|                                             |                                                                |
|---------------------------------------------|----------------------------------------------------------------|
| b/Å                                         | 15.2120(3)                                                     |
| c/Å                                         | 16.4772(2)                                                     |
| $\alpha$ /°                                 | 90                                                             |
| $\beta$ /°                                  | 90                                                             |
| $\gamma$ /°                                 | 90                                                             |
| Volume/Å <sup>3</sup>                       | 2161.08(6)                                                     |
| Z                                           | 4                                                              |
| $\rho_{\text{calc}}$ /cm <sup>3</sup>       | 1.394                                                          |
| $\mu$ /mm <sup>-1</sup>                     | 2.538                                                          |
| F(000)                                      | 944.0                                                          |
| Crystal size/mm <sup>3</sup>                | 0.15 × 0.1 × 0.08                                              |
| Radiation                                   | CuK $\alpha$ ( $\lambda$ = 1.54184)                            |
| 2 $\theta$ range for data collection/°      | 7.91 to 141.83                                                 |
| Index ranges                                | -9 ≤ h ≤ 10, -18 ≤ k ≤ 17, -19 ≤ l ≤ 19                        |
| Reflections collected                       | 8178                                                           |
| Independent reflections                     | 4097 [ $R_{\text{int}}$ = 0.0294, $R_{\text{sigma}}$ = 0.0385] |
| Data/restraints/parameters                  | 4097/0/281                                                     |
| Goodness-of-fit on F <sup>2</sup>           | 1.033                                                          |
| Final R indexes [ $I \geq 2\sigma(I)$ ]     | $R_1$ = 0.0348, $wR_2$ = 0.0886                                |
| Final R indexes [all data]                  | $R_1$ = 0.0381, $wR_2$ = 0.0913                                |
| Largest diff. peak/hole / e Å <sup>-3</sup> | 0.19/-0.23                                                     |
| Flack parameter                             | 0.015(10)                                                      |

**Table 2 Fractional Atomic Coordinates ( $\times 10^4$ ) and Equivalent Isotropic Displacement Parameters ( $\text{\AA}^2 \times 10^3$ ) for BLWyanghua.  $U_{\text{eq}}$  is defined as 1/3 of of the trace of the orthogonalised  $U_{ij}$  tensor.**

| Atom | x       | y          | z          | U(eq)    |
|------|---------|------------|------------|----------|
| C1   | 8116(4) | 4308(2)    | 6808.4(19) | 44.1(6)  |
| C2   | 5946(3) | 3396(2)    | 6516.0(17) | 40.7(6)  |
| C3   | 5095(3) | 4240.9(19) | 6762.5(16) | 38.8(6)  |
| C4   | 3893(3) | 4596(2)    | 6181.9(17) | 42.4(6)  |
| C5   | 3396(4) | 4140(2)    | 5499.6(18) | 51.9(7)  |
| C6   | 2311(5) | 4519(3)    | 4983(2)    | 62(1)    |
| C7   | 1706(5) | 5326(3)    | 5138(2)    | 65.5(10) |
| C8   | 2158(5) | 5776(3)    | 5825(2)    | 66.9(10) |
| C9   | 3262(5) | 5420(2)    | 6335(2)    | 56.4(8)  |
| C10  | 2521(4) | 3356(2)    | 7540(2)    | 51.0(7)  |
| C11  | 1771(4) | 3079(2)    | 8319(2)    | 47.1(7)  |
| C12  | 705(5)  | 3621(3)    | 8696(3)    | 66.0(9)  |
| C13  | 37(6)   | 3360(4)    | 9421(3)    | 86.1(14) |

|     |           |            |            |           |
|-----|-----------|------------|------------|-----------|
| C14 | 401(6)    | 2578(4)    | 9767(3)    | 89.0(16)  |
| C15 | 1442(6)   | 2043(4)    | 9400(4)    | 91.6(17)  |
| C16 | 2137(5)   | 2286(3)    | 8675(3)    | 73.5(12)  |
| C17 | 8582(3)   | 2759.6(19) | 6486.9(18) | 40.9(6)   |
| C18 | 8438(4)   | 2045(2)    | 7007(2)    | 52.2(7)   |
| C19 | 9454(4)   | 1353(2)    | 6940(2)    | 55.7(8)   |
| C20 | 10639(4)  | 1371(2)    | 6371.2(18) | 45.7(6)   |
| C21 | 10795(4)  | 2089(2)    | 5857.7(18) | 45.4(6)   |
| C22 | 9750(4)   | 2779(2)    | 5920.5(19) | 44.7(6)   |
| C23 | 12837(6)  | 634(3)     | 5808(3)    | 80.8(14)  |
| N1  | 7547(3)   | 3490.2(16) | 6571.1(15) | 41.7(5)   |
| O1  | 9445(3)   | 4499.4(16) | 6872.2(19) | 59.9(6)   |
| O2  | 5307(3)   | 2733.0(14) | 6317.3(16) | 52.2(5)   |
| O3  | 3756(3)   | 4814.5(17) | 8118.2(14) | 60.3(6)   |
| O4  | 5326(3)   | 3468.4(19) | 8203.9(15) | 62.1(6)   |
| O5  | 11568(3)  | 646.8(18)  | 6352.8(18) | 67.4(7)   |
| S1  | 6579.5(9) | 5054.1(5)  | 6980.8(5)  | 50.0(2)   |
| S2  | 4219.3(8) | 3992.5(5)  | 7772.9(4)  | 42.79(18) |

**Table 3 Anisotropic Displacement Parameters ( $\text{\AA}^2 \times 10^3$ ) for BLWyanghua. The Anisotropic displacement factor exponent takes the form:  $-2\pi^2[h^2a^{*2}U_{11}+2hka^*b^*U_{12}+\dots]$ .**

| Atom | $U_{11}$ | $U_{22}$ | $U_{33}$ | $U_{23}$ | $U_{13}$ | $U_{12}$ |
|------|----------|----------|----------|----------|----------|----------|
| C1   | 40.0(16) | 43.7(14) | 48.8(15) | 2.4(12)  | -1.1(13) | 0.1(12)  |
| C2   | 37.2(14) | 43.2(15) | 41.8(13) | -0.8(11) | 0.8(12)  | 1.6(12)  |
| C3   | 37.6(13) | 41.3(14) | 37.5(12) | -2.8(11) | -0.7(11) | 1.6(11)  |
| C4   | 39.3(15) | 52.4(16) | 35.5(12) | 3.8(11)  | 2.3(11)  | 5.2(12)  |
| C5   | 51.5(17) | 65(2)    | 38.7(13) | -6.4(13) | -0.3(13) | 5.8(17)  |
| C6   | 57(2)    | 92(3)    | 36.7(15) | -0.1(16) | -5.5(14) | -1(2)    |
| C7   | 57(2)    | 92(3)    | 47.6(17) | 18.8(17) | -4.4(17) | 16(2)    |
| C8   | 69(2)    | 70(2)    | 62(2)    | 4.7(18)  | -4.5(18) | 25.8(19) |
| C9   | 64(2)    | 56.4(18) | 48.5(16) | -5.2(14) | -6.7(16) | 18.3(17) |
| C10  | 41.8(16) | 65.9(19) | 45.4(14) | -6.9(14) | -5.6(13) | -7.2(15) |
| C11  | 39.3(15) | 50.6(16) | 51.4(15) | -2.6(13) | -3.9(13) | -6.2(13) |
| C12  | 65(2)    | 63(2)    | 70(2)    | 6.4(18)  | 15(2)    | 0(2)     |
| C13  | 85(3)    | 92(3)    | 81(3)    | -7(3)    | 36(3)    | -14(3)   |
| C14  | 83(3)    | 116(4)   | 67(2)    | 23(3)    | 2(2)     | -45(3)   |
| C15  | 66(3)    | 85(3)    | 123(4)   | 57(3)    | -12(3)   | -23(3)   |
| C16  | 52(2)    | 57(2)    | 111(3)   | 11(2)    | -1(2)    | -4.3(17) |
| C17  | 36.2(13) | 40.2(14) | 46.3(14) | 2.2(11)  | -2.7(12) | 0.8(12)  |

|     |          |          |          |           |           |          |
|-----|----------|----------|----------|-----------|-----------|----------|
| C18 | 45.2(15) | 54.3(17) | 57.1(17) | 10.6(14)  | 11.1(14)  | 4.6(14)  |
| C19 | 56.0(18) | 50.7(16) | 60.3(17) | 16.0(15)  | 4.9(16)   | 8.7(15)  |
| C20 | 41.3(14) | 47.1(15) | 48.7(14) | -0.3(12)  | -6.2(13)  | 8.0(13)  |
| C21 | 40.4(14) | 53.7(16) | 42.2(13) | 0.6(12)   | 4.0(13)   | 1.6(14)  |
| C22 | 43.6(15) | 46.5(15) | 43.9(14) | 6.8(12)   | -0.9(12)  | -1.2(13) |
| C23 | 73(3)    | 94(3)    | 76(3)    | 4(2)      | 11(2)     | 46(3)    |
| N1  | 35.0(12) | 40.6(12) | 49.6(12) | 1.8(10)   | -1.2(10)  | 0.8(10)  |
| O1  | 38.5(12) | 54.7(12) | 86.5(17) | -4.7(12)  | -2.4(12)  | -6.9(10) |
| O2  | 42.4(11) | 45.6(12) | 68.5(13) | -10.8(10) | -4.6(10)  | -1.2(9)  |
| O3  | 68.0(16) | 68.2(15) | 44.6(11) | -13.8(11) | 9.3(11)   | -3.9(12) |
| O4  | 49.9(13) | 81.7(17) | 54.8(12) | 16.8(13)  | -12.9(10) | -5.1(12) |
| O5  | 62.8(15) | 63.2(15) | 76.3(16) | 12.2(13)  | 7.6(14)   | 25.0(13) |
| S1  | 42.6(4)  | 39.9(3)  | 67.5(5)  | -7.8(3)   | -1.3(3)   | -1.0(3)  |
| S2  | 39.6(3)  | 55.3(4)  | 33.5(3)  | -1.1(3)   | -3.9(3)   | -3.1(3)  |

**Table 4 Bond Lengths for BLWyanghua.**

| Atom | Atom | Length/Å | Atom | Atom | Length/Å |
|------|------|----------|------|------|----------|
| C1   | N1   | 1.394(4) | C11  | C12  | 1.382(5) |
| C1   | O1   | 1.186(4) | C11  | C16  | 1.377(5) |
| C1   | S1   | 1.767(3) | C12  | C13  | 1.385(6) |
| C2   | C3   | 1.534(4) | C13  | C14  | 1.356(8) |
| C2   | N1   | 1.391(4) | C14  | C15  | 1.355(9) |
| C2   | O2   | 1.195(4) | C15  | C16  | 1.387(8) |
| C3   | C4   | 1.510(4) | C17  | C18  | 1.390(4) |
| C3   | S1   | 1.816(3) | C17  | C22  | 1.373(4) |
| C3   | S2   | 1.867(3) | C17  | N1   | 1.432(4) |
| C4   | C5   | 1.389(4) | C18  | C19  | 1.374(5) |
| C4   | C9   | 1.389(5) | C19  | C20  | 1.386(5) |
| C5   | C6   | 1.389(5) | C20  | C21  | 1.388(4) |
| C6   | C7   | 1.358(6) | C20  | O5   | 1.362(4) |
| C7   | C8   | 1.379(6) | C21  | C22  | 1.387(4) |
| C8   | C9   | 1.381(5) | C23  | O5   | 1.416(5) |
| C10  | C11  | 1.498(5) | O3   | S2   | 1.431(3) |
| C10  | S2   | 1.797(3) | O4   | S2   | 1.432(3) |

**Table 5 Bond Angles for BLWyanghua.**

| Atom | Atom | Atom | Angle/° | Atom | Atom | Atom | Angle/° |
|------|------|------|---------|------|------|------|---------|
|------|------|------|---------|------|------|------|---------|

|     |     |     |            |     |     |     |            |
|-----|-----|-----|------------|-----|-----|-----|------------|
| N1  | C1  | S1  | 110.7(2)   | C14 | C13 | C12 | 121.2(5)   |
| O1  | C1  | N1  | 125.7(3)   | C15 | C14 | C13 | 119.5(4)   |
| O1  | C1  | S1  | 123.5(3)   | C14 | C15 | C16 | 120.7(5)   |
| N1  | C2  | C3  | 111.8(3)   | C11 | C16 | C15 | 120.1(5)   |
| O2  | C2  | C3  | 124.0(3)   | C18 | C17 | N1  | 119.5(3)   |
| O2  | C2  | N1  | 124.2(3)   | C22 | C17 | C18 | 120.1(3)   |
| C2  | C3  | S1  | 106.6(2)   | C22 | C17 | N1  | 120.4(3)   |
| C2  | C3  | S2  | 105.06(19) | C19 | C18 | C17 | 119.6(3)   |
| C4  | C3  | C2  | 117.4(2)   | C18 | C19 | C20 | 120.6(3)   |
| C4  | C3  | S1  | 111.4(2)   | C19 | C20 | C21 | 119.9(3)   |
| C4  | C3  | S2  | 111.1(2)   | O5  | C20 | C19 | 115.6(3)   |
| S1  | C3  | S2  | 104.25(14) | O5  | C20 | C21 | 124.5(3)   |
| C5  | C4  | C3  | 123.1(3)   | C22 | C21 | C20 | 119.1(3)   |
| C9  | C4  | C3  | 118.5(3)   | C17 | C22 | C21 | 120.7(3)   |
| C9  | C4  | C5  | 118.5(3)   | C1  | N1  | C17 | 120.0(2)   |
| C4  | C5  | C6  | 119.8(3)   | C2  | N1  | C1  | 117.4(3)   |
| C7  | C6  | C5  | 121.2(3)   | C2  | N1  | C17 | 122.2(3)   |
| C6  | C7  | C8  | 119.6(3)   | C20 | O5  | C23 | 118.6(3)   |
| C7  | C8  | C9  | 120.0(4)   | C1  | S1  | C3  | 93.40(13)  |
| C8  | C9  | C4  | 120.9(3)   | C10 | S2  | C3  | 104.36(14) |
| C11 | C10 | S2  | 108.7(2)   | O3  | S2  | C3  | 106.90(14) |
| C12 | C11 | C10 | 120.3(3)   | O3  | S2  | C10 | 109.16(16) |
| C16 | C11 | C10 | 120.8(4)   | O3  | S2  | O4  | 118.39(17) |
| C16 | C11 | C12 | 118.9(4)   | O4  | S2  | C3  | 106.60(14) |
| C11 | C12 | C13 | 119.5(4)   | O4  | S2  | C10 | 110.44(16) |

Table 6 Torsion Angles for BLWyanghua.

| A  | B  | C  | D   | Angle/°   | A   | B   | C   | D   | Angle/°   |
|----|----|----|-----|-----------|-----|-----|-----|-----|-----------|
| C2 | C3 | C4 | C5  | 8.4(4)    | C18 | C19 | C20 | O5  | -179.4(3) |
| C2 | C3 | C4 | C9  | -171.3(3) | C19 | C20 | C21 | C22 | -0.3(5)   |
| C2 | C3 | S1 | C1  | -2.6(2)   | C19 | C20 | O5  | C23 | -177.7(4) |
| C2 | C3 | S2 | C10 | -78.7(2)  | C20 | C21 | C22 | C17 | 0.6(5)    |
| C2 | C3 | S2 | O3  | 165.7(2)  | C21 | C20 | O5  | C23 | 3.7(6)    |
| C2 | C3 | S2 | O4  | 38.2(2)   | C22 | C17 | C18 | C19 | -1.2(5)   |
| C3 | C2 | N1 | C1  | -1.7(4)   | C22 | C17 | N1  | C1  | -62.9(4)  |
| C3 | C2 | N1 | C17 | 170.8(2)  | C22 | C17 | N1  | C2  | 124.7(3)  |
| C3 | C4 | C5 | C6  | -178.5(3) | N1  | C1  | S1  | C3  | 1.8(2)    |
| C3 | C4 | C9 | C8  | -180.0(4) | N1  | C2  | C3  | C4  | 128.6(3)  |
| C4 | C3 | S1 | C1  | -131.9(2) | N1  | C2  | C3  | S1  | 2.9(3)    |

|              |           |              |            |
|--------------|-----------|--------------|------------|
| C4 C3 S2 C10 | 49.2(2)   | N1 C2 C3 S2  | -107.4(2)  |
| C4 C3 S2 O3  | -66.4(2)  | N1 C17C18C19 | -178.4(3)  |
| C4 C3 S2 O4  | 166.1(2)  | N1 C17C22C21 | 177.4(3)   |
| C4 C5 C6 C7  | -1.0(6)   | O1 C1 N1 C2  | -178.8(3)  |
| C5 C4 C9 C8  | 0.3(6)    | O1 C1 N1 C17 | 8.5(5)     |
| C5 C6 C7 C8  | -0.8(6)   | O1 C1 S1 C3  | -179.7(3)  |
| C6 C7 C8 C9  | 2.3(6)    | O2 C2 C3 C4  | -52.8(4)   |
| C7 C8 C9 C4  | -2.1(6)   | O2 C2 C3 S1  | -178.5(3)  |
| C9 C4 C5 C6  | 1.2(5)    | O2 C2 C3 S2  | 71.2(3)    |
| C10C11C12C13 | -179.1(4) | O2 C2 N1 C1  | 179.7(3)   |
| C10C11C16C15 | 179.4(4)  | O2 C2 N1 C17 | -7.7(5)    |
| C11C10S2 C3  | 177.0(2)  | O5 C20C21C22 | 178.3(3)   |
| C11C10S2 O3  | -69.0(3)  | S1 C1 N1 C2  | -0.4(3)    |
| C11C10S2 O4  | 62.8(3)   | S1 C1 N1 C17 | -173.1(2)  |
| C11C12C13C14 | -0.5(8)   | S1 C3 C4 C5  | 131.7(3)   |
| C12C11C16C15 | -0.1(6)   | S1 C3 C4 C9  | -48.0(4)   |
| C12C13C14C15 | 0.3(8)    | S1 C3 S2 C10 | 169.29(16) |
| C13C14C15C16 | 0.0(8)    | S1 C3 S2 O3  | 53.71(18)  |
| C14C15C16C11 | -0.1(7)   | S1 C3 S2 O4  | -73.82(18) |
| C16C11C12C13 | 0.3(6)    | S2 C3 C4 C5  | -112.5(3)  |
| C17C18C19C20 | 1.4(6)    | S2 C3 C4 C9  | 67.8(3)    |
| C18C17C22C21 | 0.1(5)    | S2 C3 S1 C1  | 108.19(16) |
| C18C17N1 C1  | 114.4(3)  | S2 C10C11C12 | 87.4(4)    |
| C18C17N1 C2  | -58.0(4)  | S2 C10C11C16 | -92.1(4)   |
| C18C19C20C21 | -0.7(5)   |              |            |

**Table 7 Hydrogen Atom Coordinates ( $\text{\AA}\times 10^4$ ) and Isotropic Displacement Parameters ( $\text{\AA}^2\times 10^3$ ) for BLWyanghua.**

| Atom | x    | y    | z     | U(eq) |
|------|------|------|-------|-------|
| H5   | 3787 | 3583 | 5389  | 62    |
| H6   | 1994 | 4214 | 4523  | 74    |
| H7   | 990  | 5573 | 4783  | 79    |
| H8   | 1720 | 6320 | 5944  | 80    |
| H9   | 3586 | 5736 | 6788  | 68    |
| H10A | 1802 | 3706 | 7222  | 61    |
| H10B | 2807 | 2843 | 7225  | 61    |
| H12  | 438  | 4157 | 8464  | 79    |
| H13  | -675 | 3728 | 9675  | 103   |
| H14  | -61  | 2410 | 10253 | 107   |

|      |       |      |      |     |
|------|-------|------|------|-----|
| H15  | 1694  | 1506 | 9636 | 110 |
| H16  | 2851  | 1914 | 8428 | 88  |
| H18  | 7660  | 2035 | 7397 | 63  |
| H19  | 9346  | 868  | 7279 | 67  |
| H21  | 11590 | 2107 | 5477 | 54  |
| H22  | 9841  | 3260 | 5575 | 54  |
| H23A | 12460 | 670  | 5261 | 121 |
| H23B | 13410 | 99   | 5877 | 121 |
| H23C | 13502 | 1127 | 5916 | 121 |

### Experimental

The crystal was kept at 293(2) K during data collection. Using Olex2 [1], the structure was solved with the ShelXS [2] structure solution program using Direct Methods and refined with the ShelXL [3] refinement package using Least Squares minimisation.

1. Dolomanov, O.V., Bourhis, L.J., Gildea, R.J, Howard, J.A.K. & Puschmann, H. (2009), *J. Appl. Cryst.* 42, 339-341.
2. Sheldrick, G.M. (2008). *Acta Cryst.* A64, 112-122.
3. Sheldrick, G.M. (2015). *Acta Cryst.* C71, 3-8.

**Crystal Data** for  $C_{23}H_{19}NO_5S_2$  ( $M = 453.51$  g/mol): orthorhombic, space group  $P2_12_12_1$  (no. 19),  $a = 8.62184(14)$  Å,  $b = 15.2120(3)$  Å,  $c = 16.4772(2)$  Å,  $V = 2161.08(6)$  Å<sup>3</sup>,  $Z = 4$ ,  $T = 293(2)$  K,  $\mu(\text{CuK}\alpha) = 2.538$  mm<sup>-1</sup>,  $D_{\text{calc}} = 1.394$  g/cm<sup>3</sup>, 8178 reflections measured ( $7.91^\circ \leq 2\theta \leq 141.83^\circ$ ), 4097 unique ( $R_{\text{int}} = 0.0294$ ,  $R_{\text{sigma}} = 0.0385$ ) which were used in all calculations. The final  $R_1$  was 0.0348 ( $I > 2\sigma(I)$ ) and  $wR_2$  was 0.0913 (all data).

### Refinement model description

Number of restraints - 0, number of constraints - unknown.

Details:

#### 1. Fixed Uiso

At 1.2 times of:

All C(H) groups, All C(H,H) groups

At 1.5 times of:

All C(H,H,H) groups

#### 2.a Secondary CH2 refined with riding coordinates:

C10(H10A,H10B)

#### 2.b Aromatic/amide H refined with riding coordinates:

C5(H5), C6(H6), C7(H7), C8(H8), C9(H9), C12(H12), C13(H13), C14(H14),

C15(H15), C16(H16), C18(H18), C19(H19), C21(H21), C22(H22)

#### 2.c Idealised Me refined as rotating group:

C23(H23A,H23B,H23C)

## 4. Copies of NMR spectra.

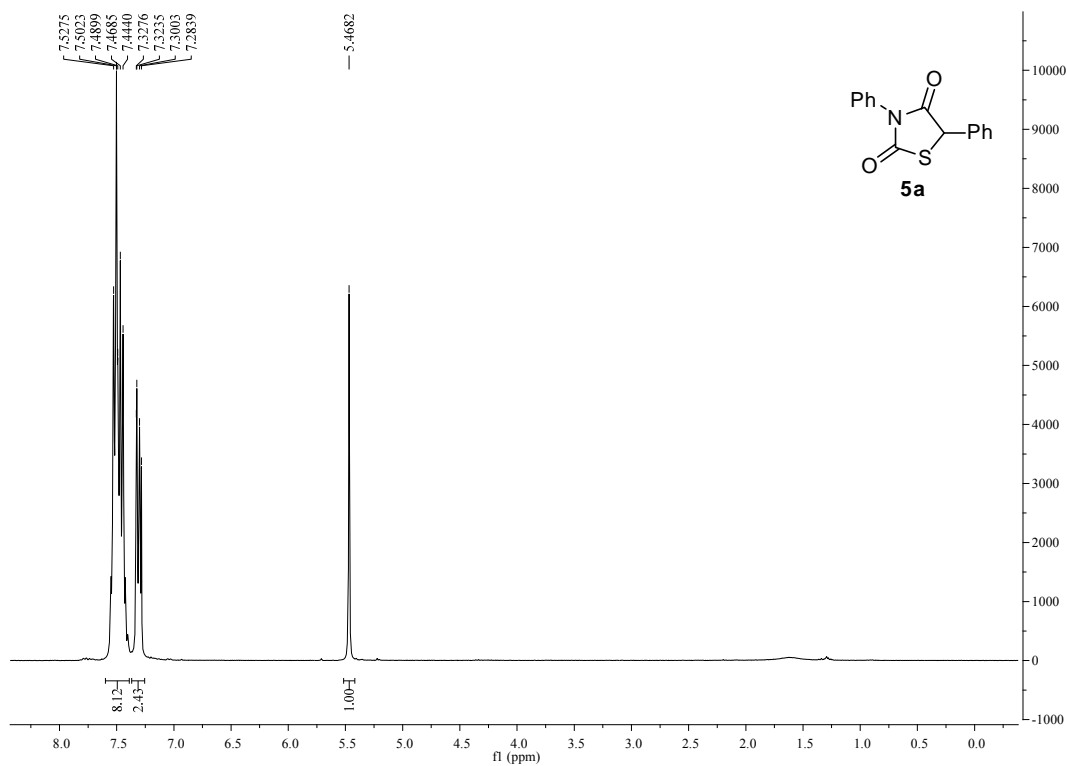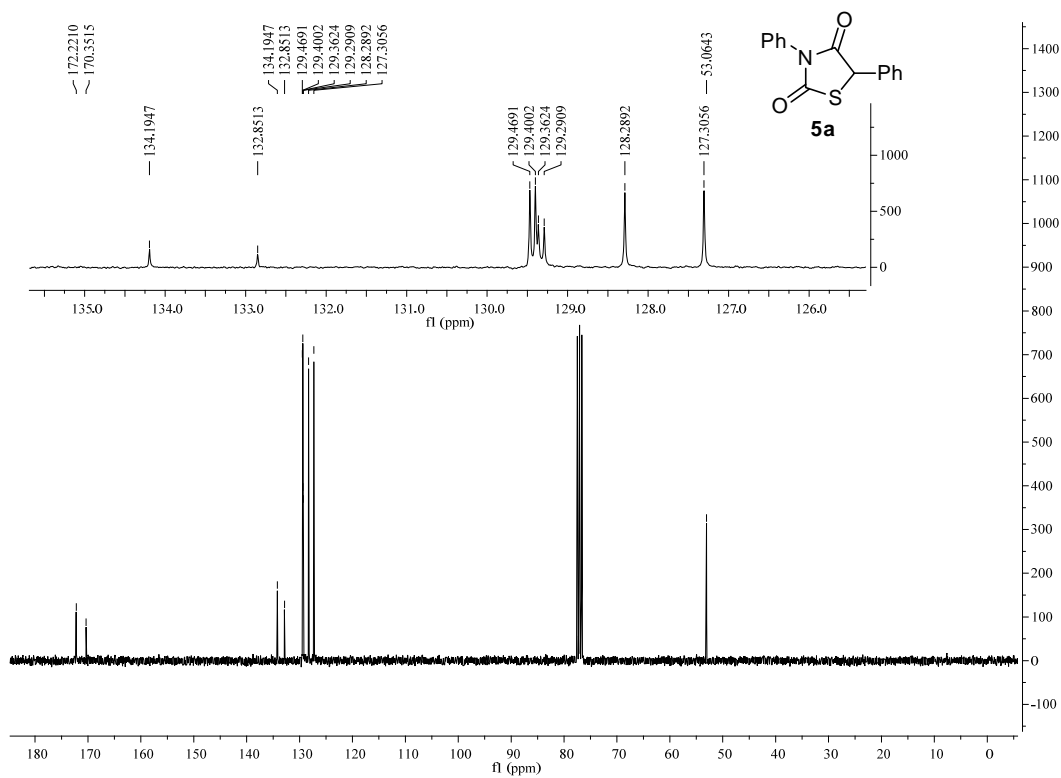



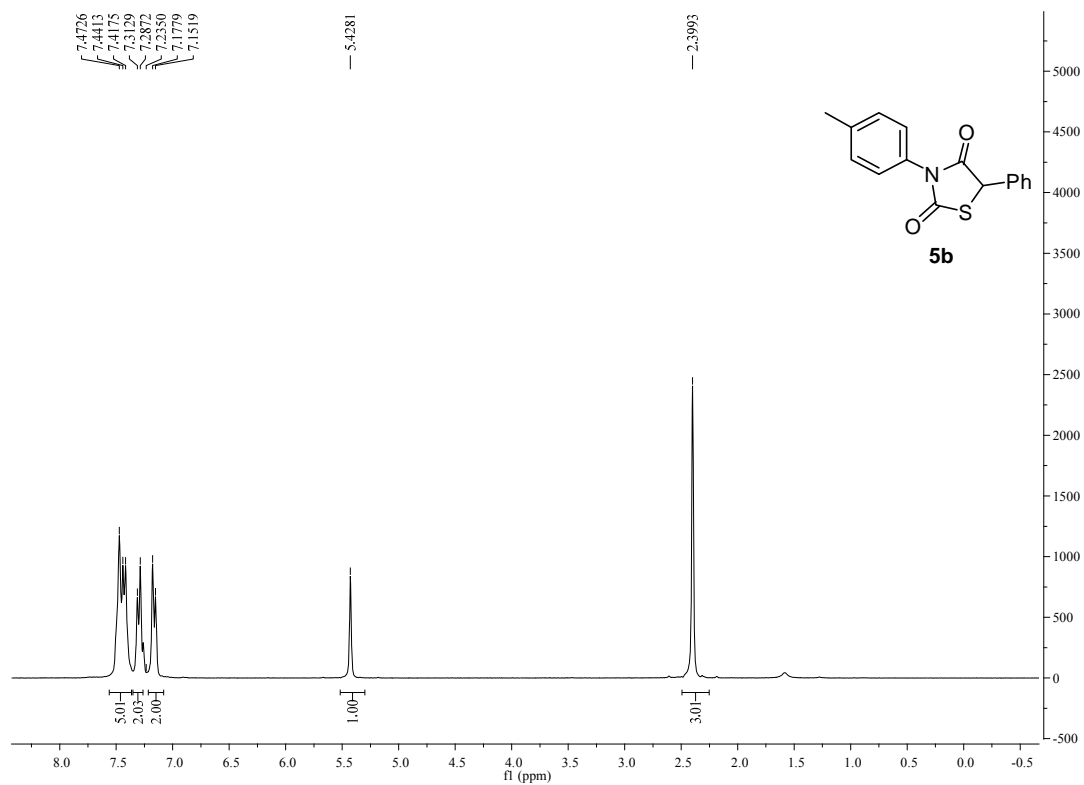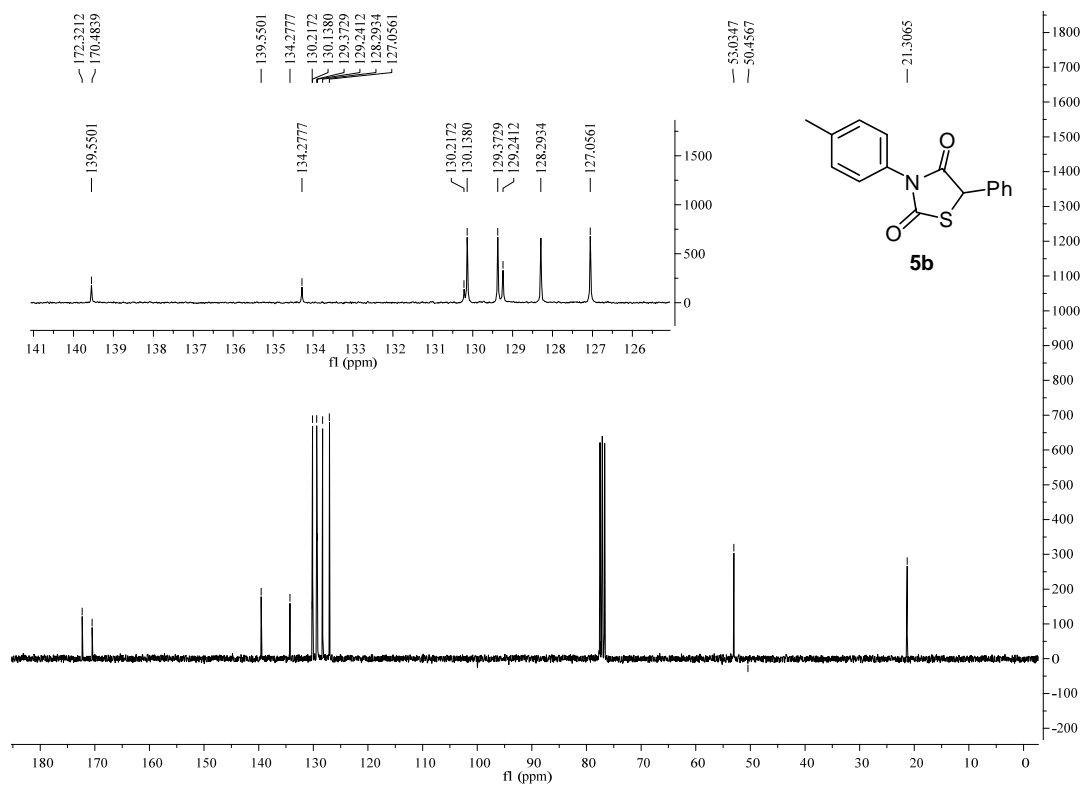

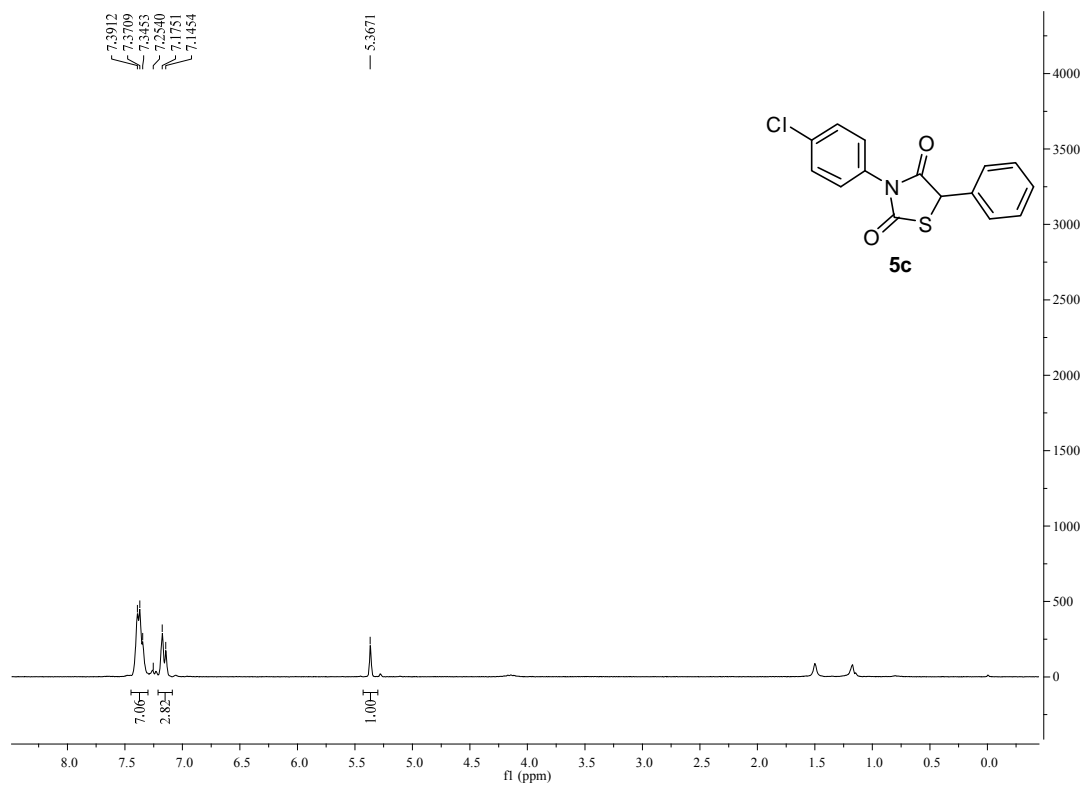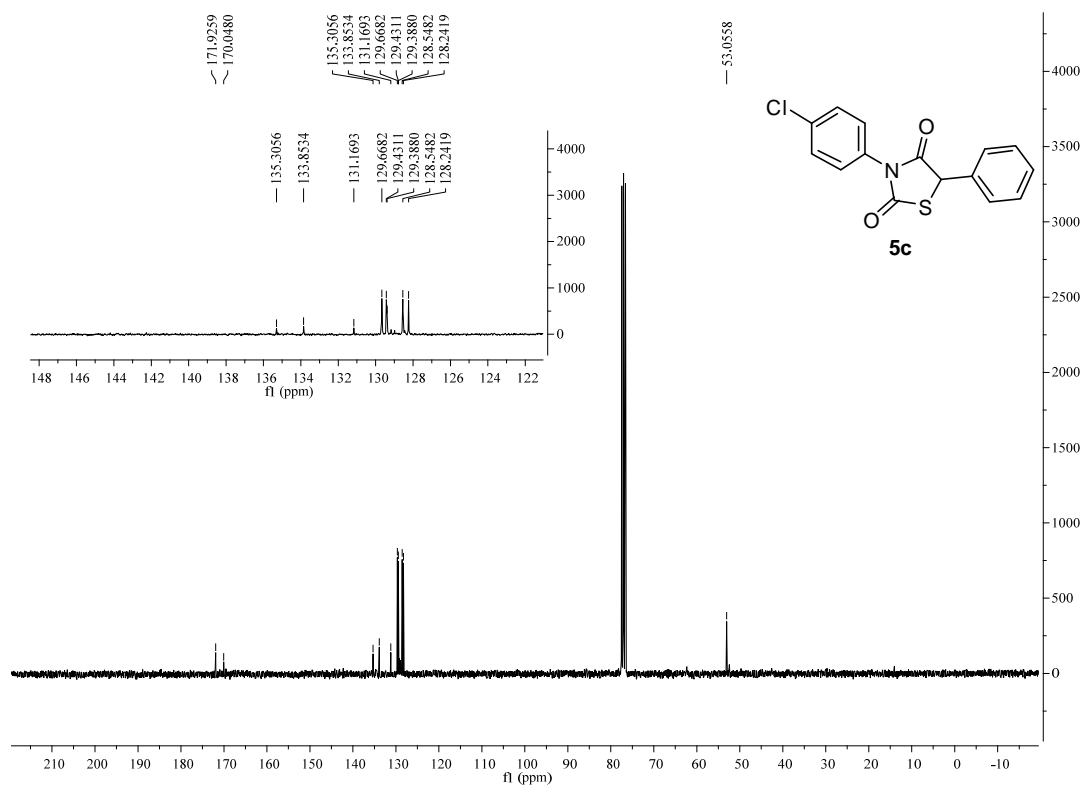

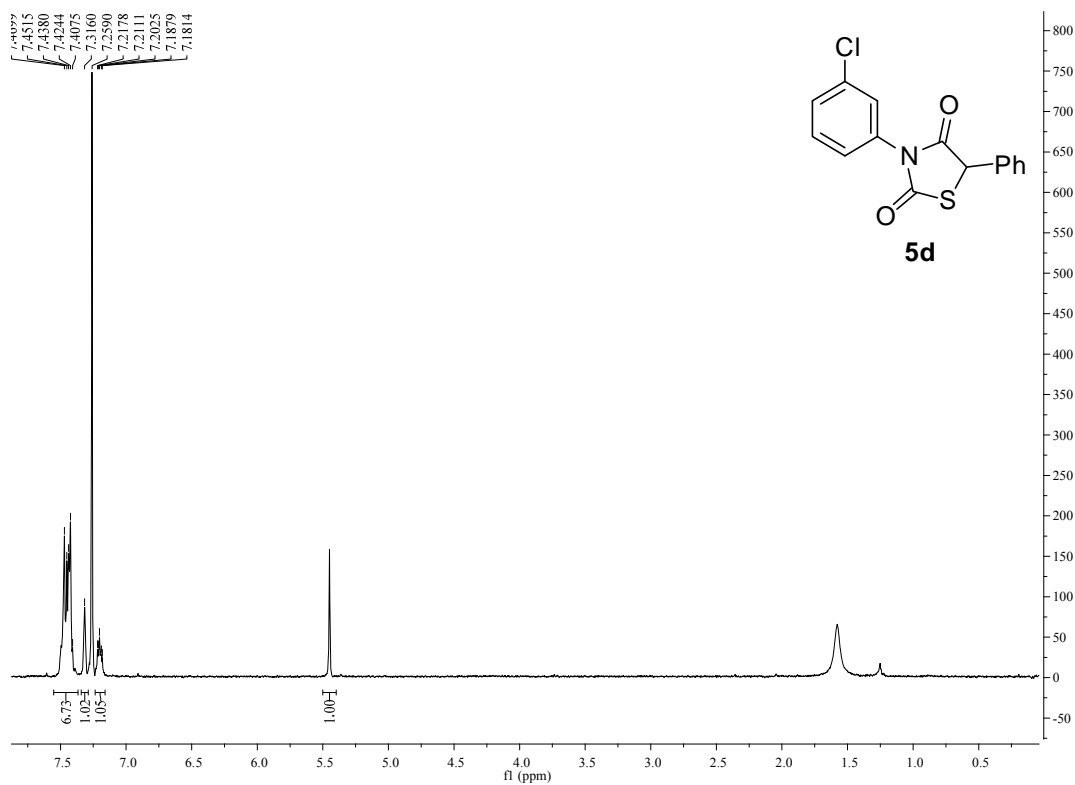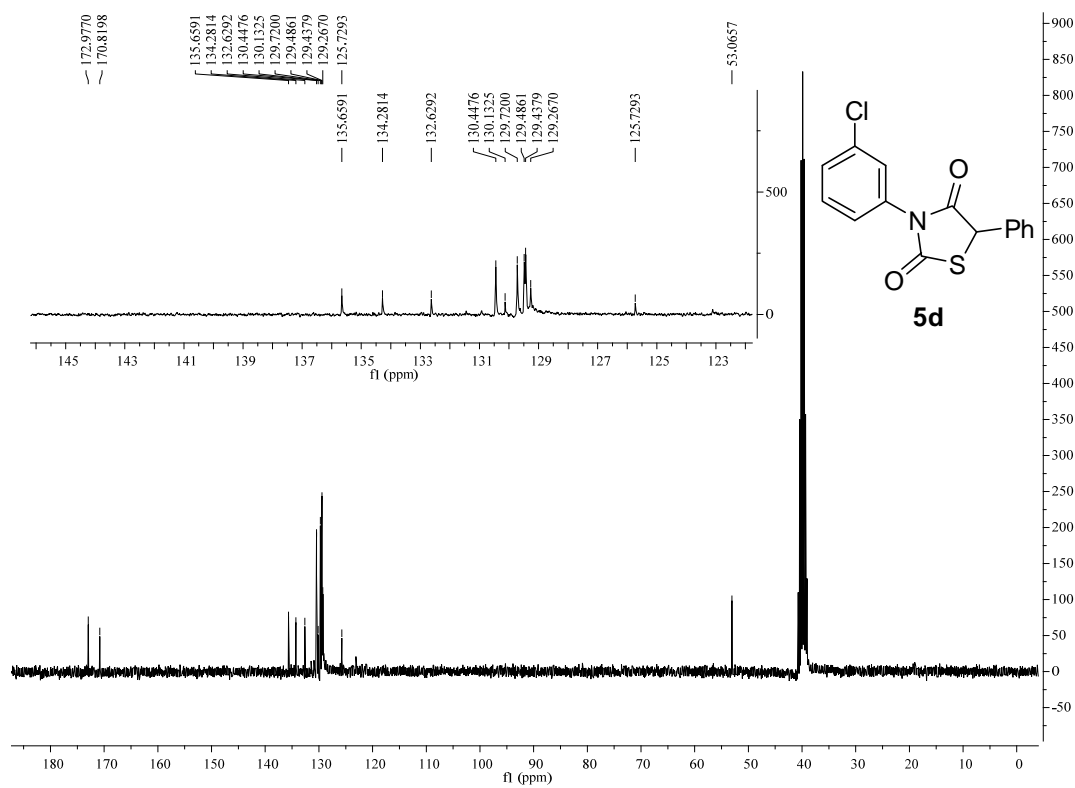

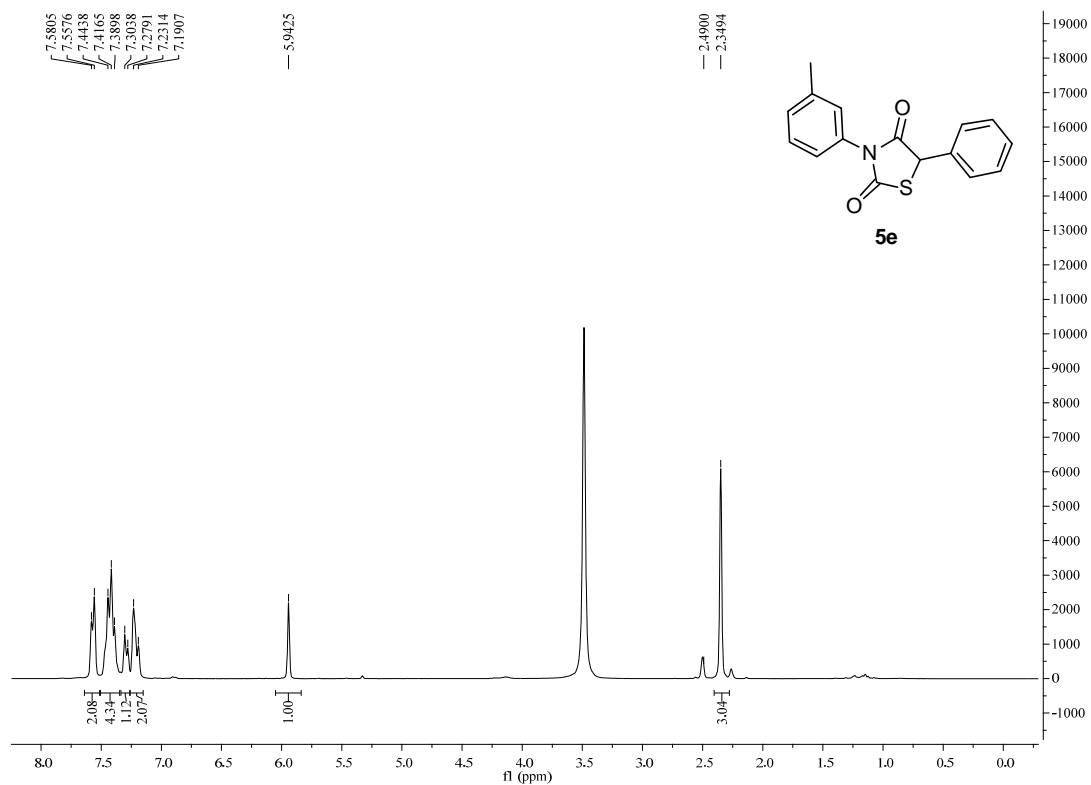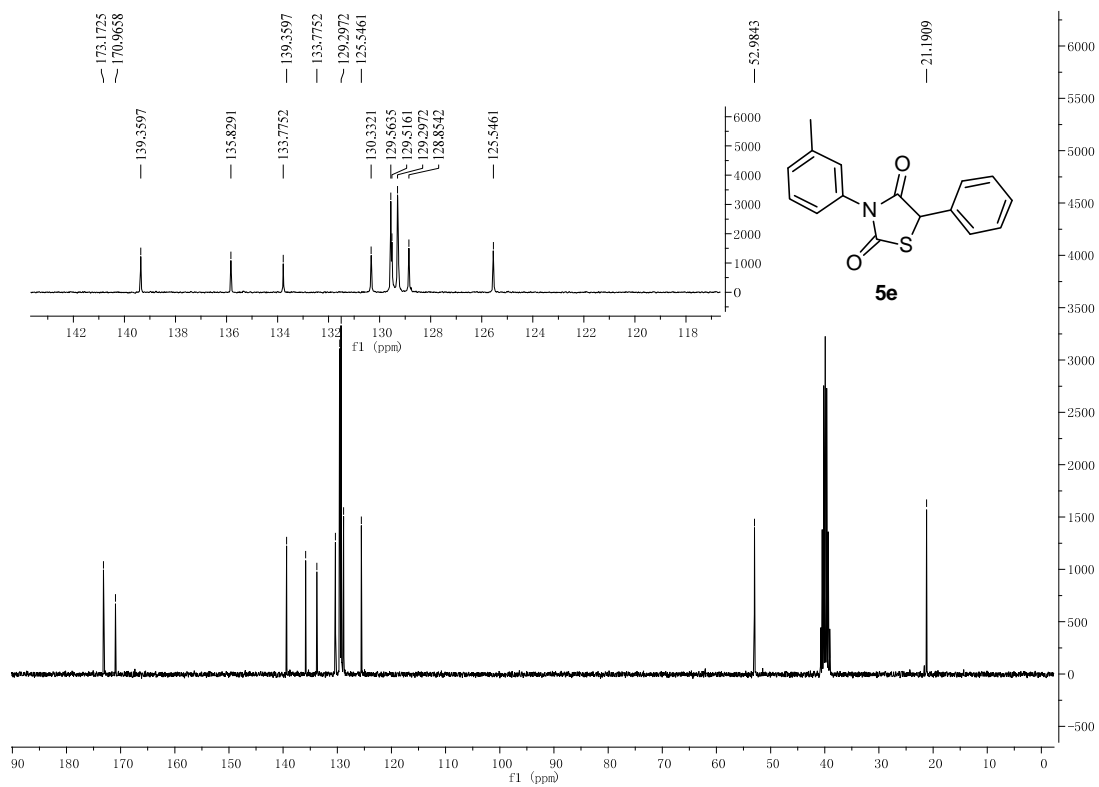

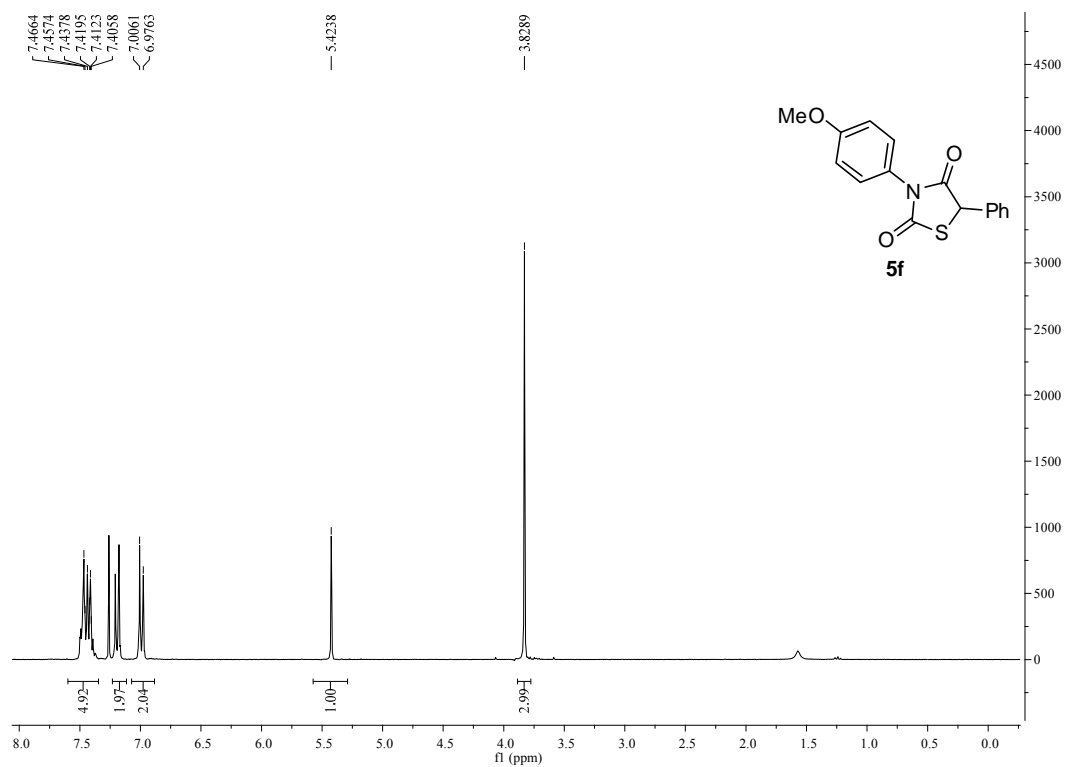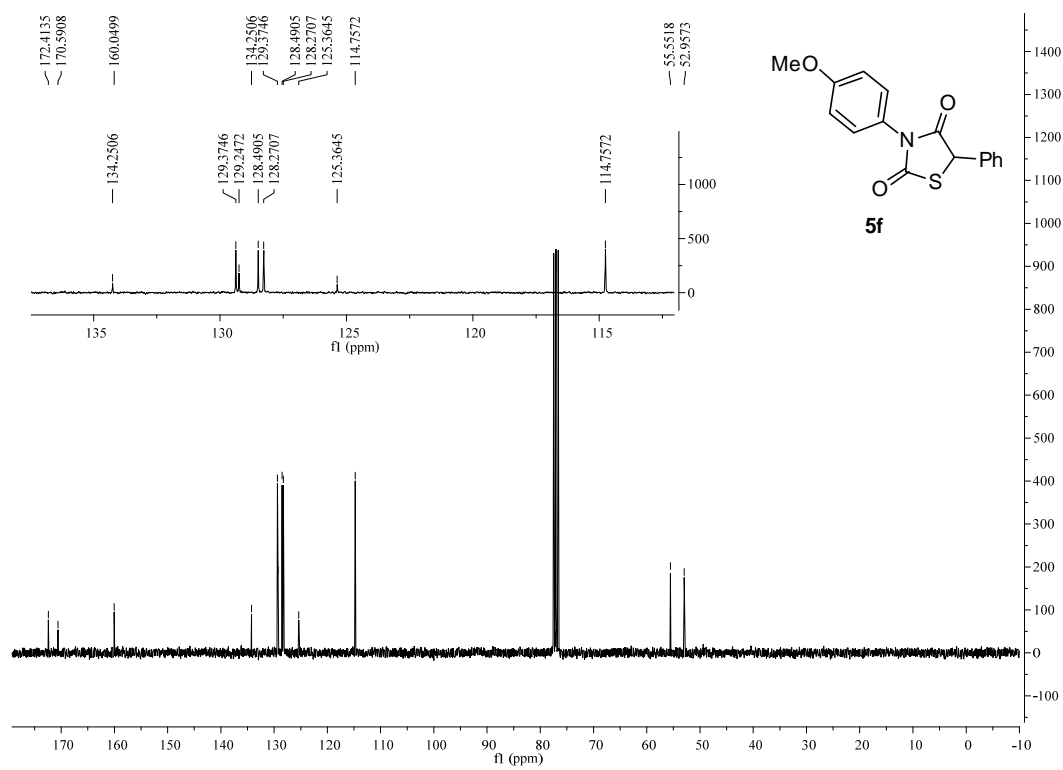

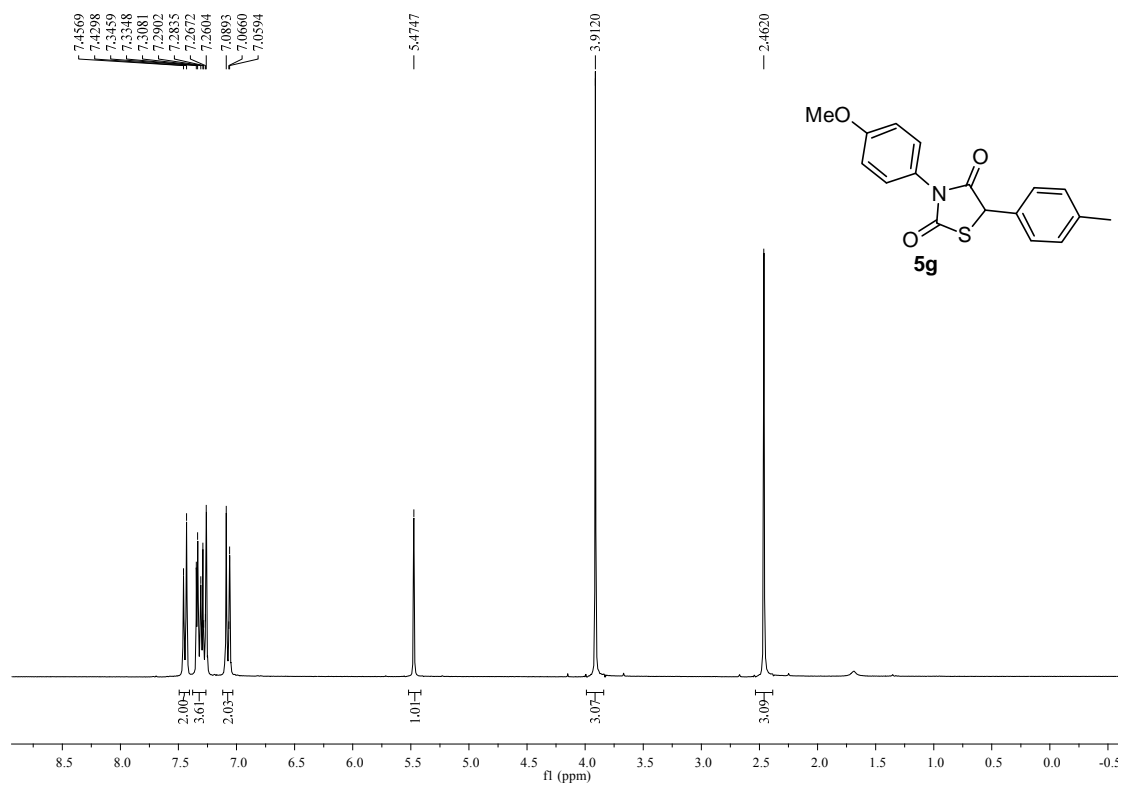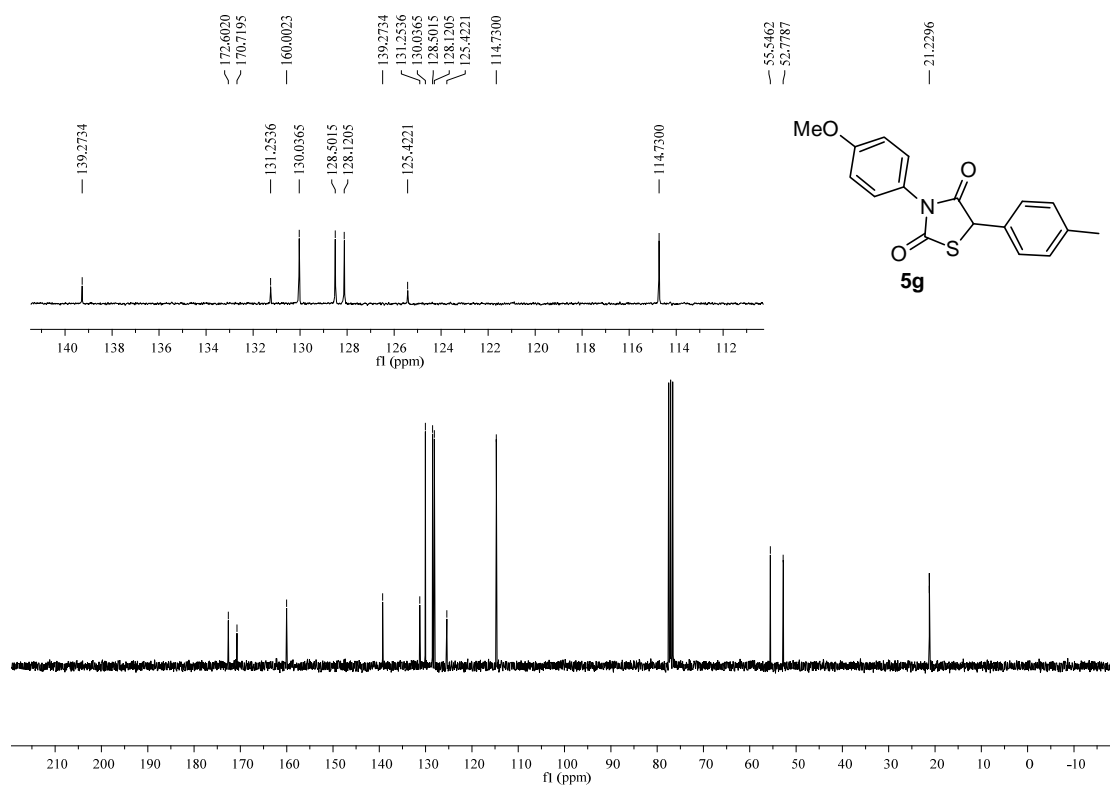

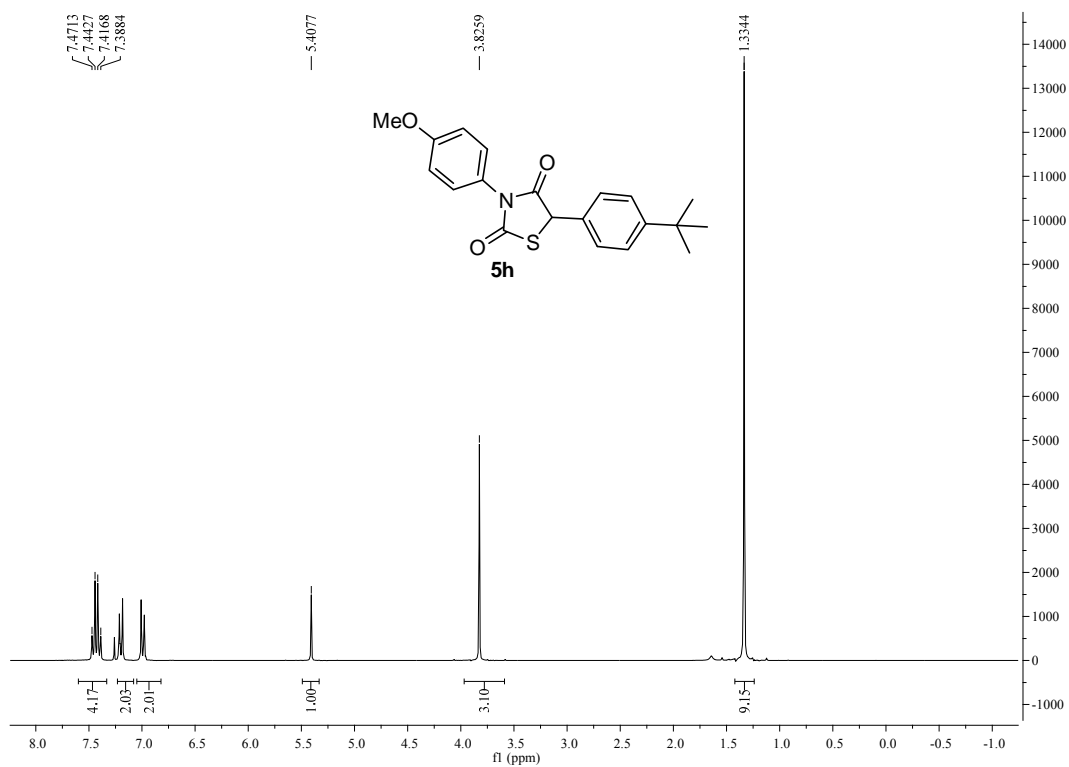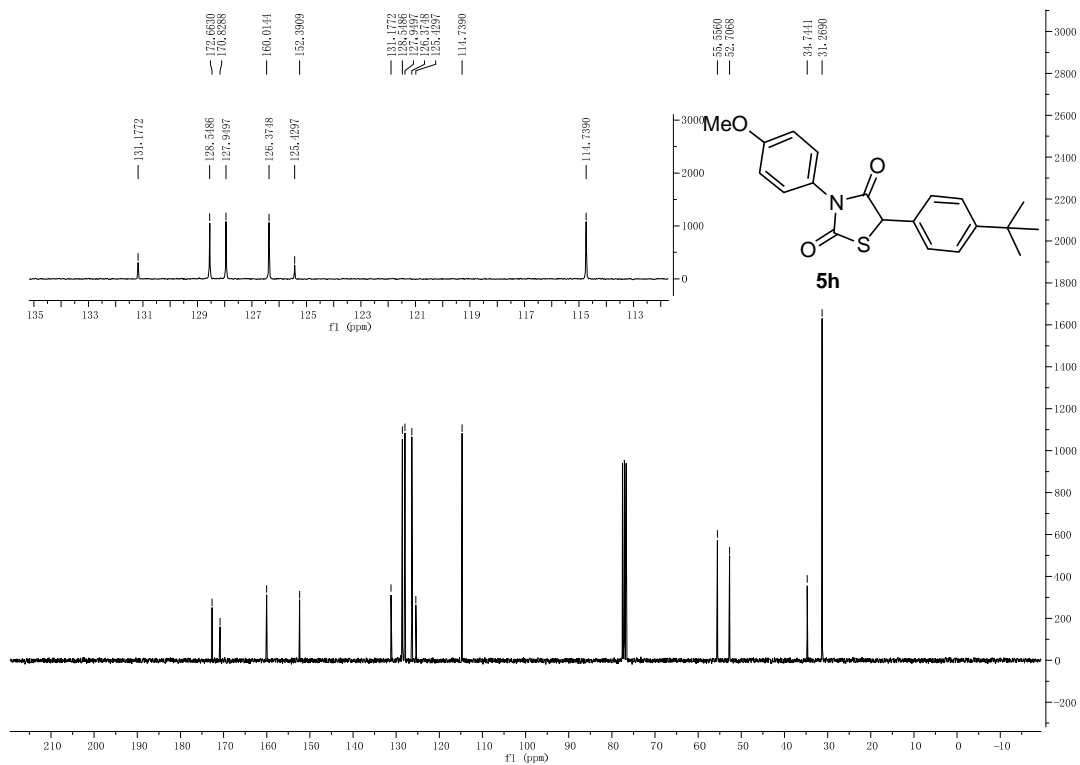

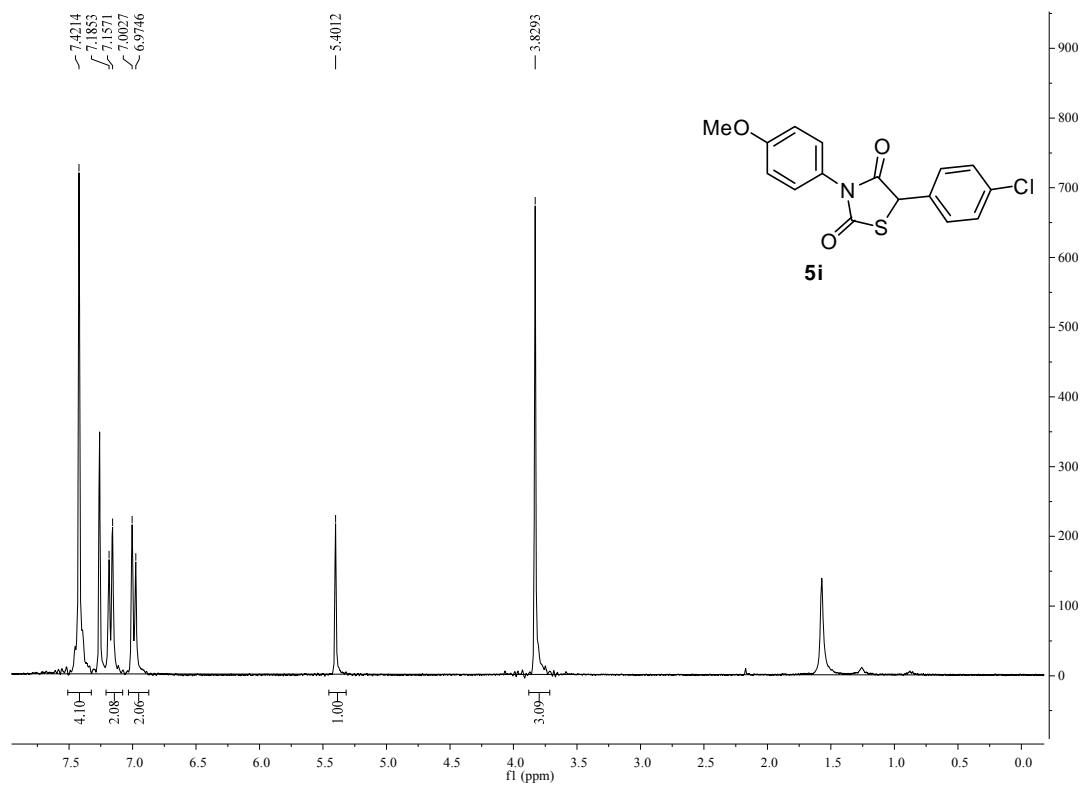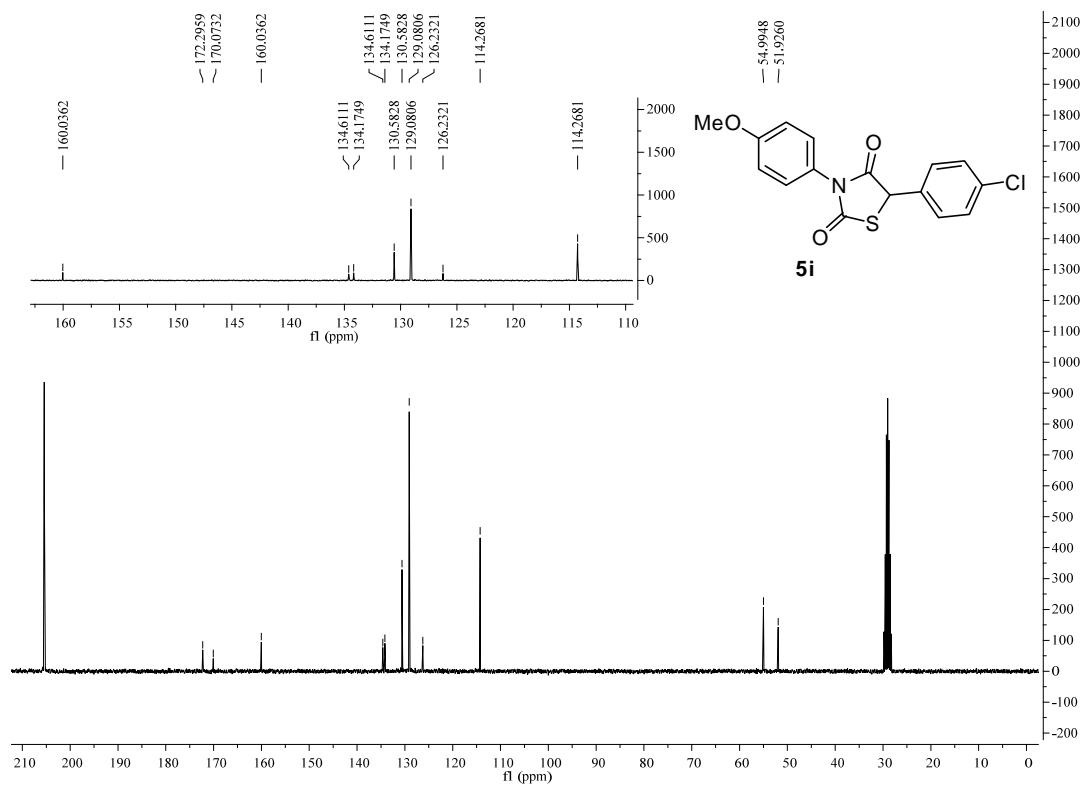



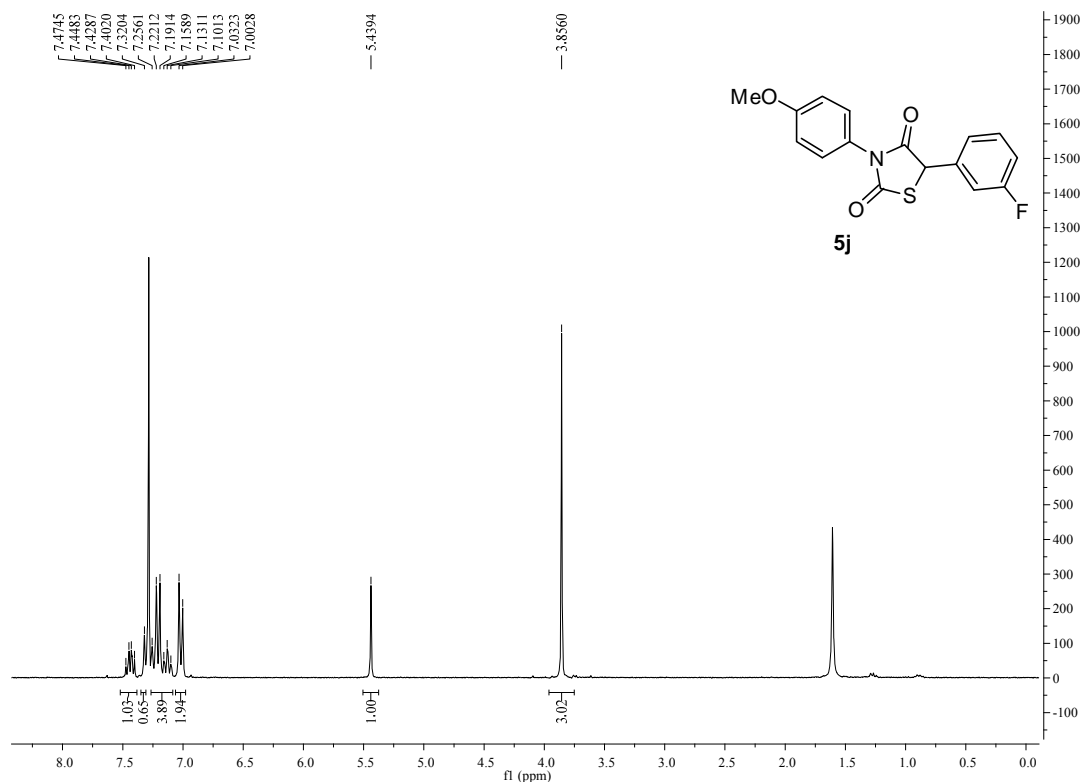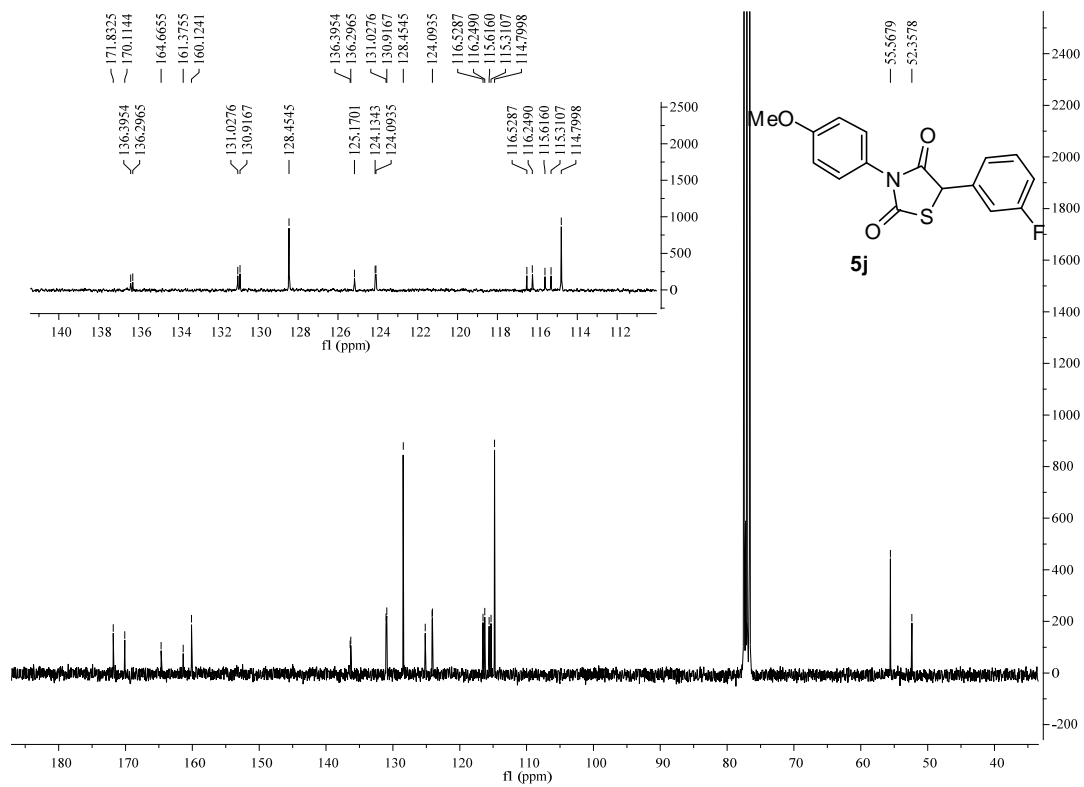

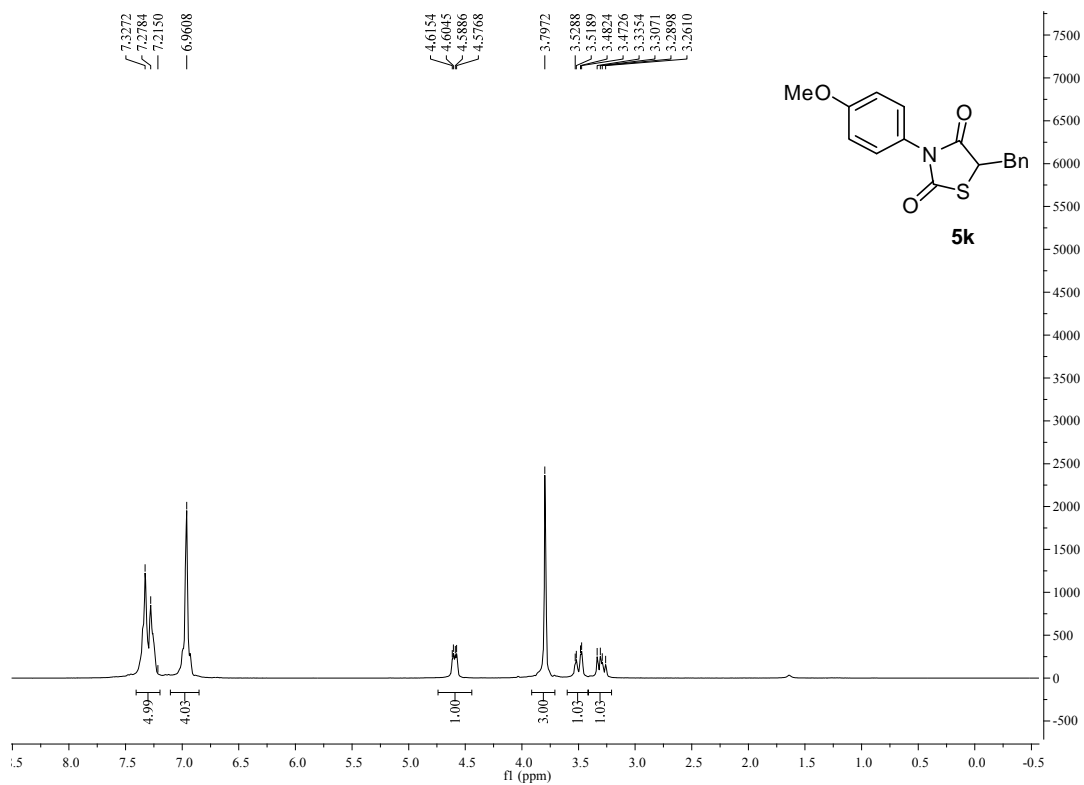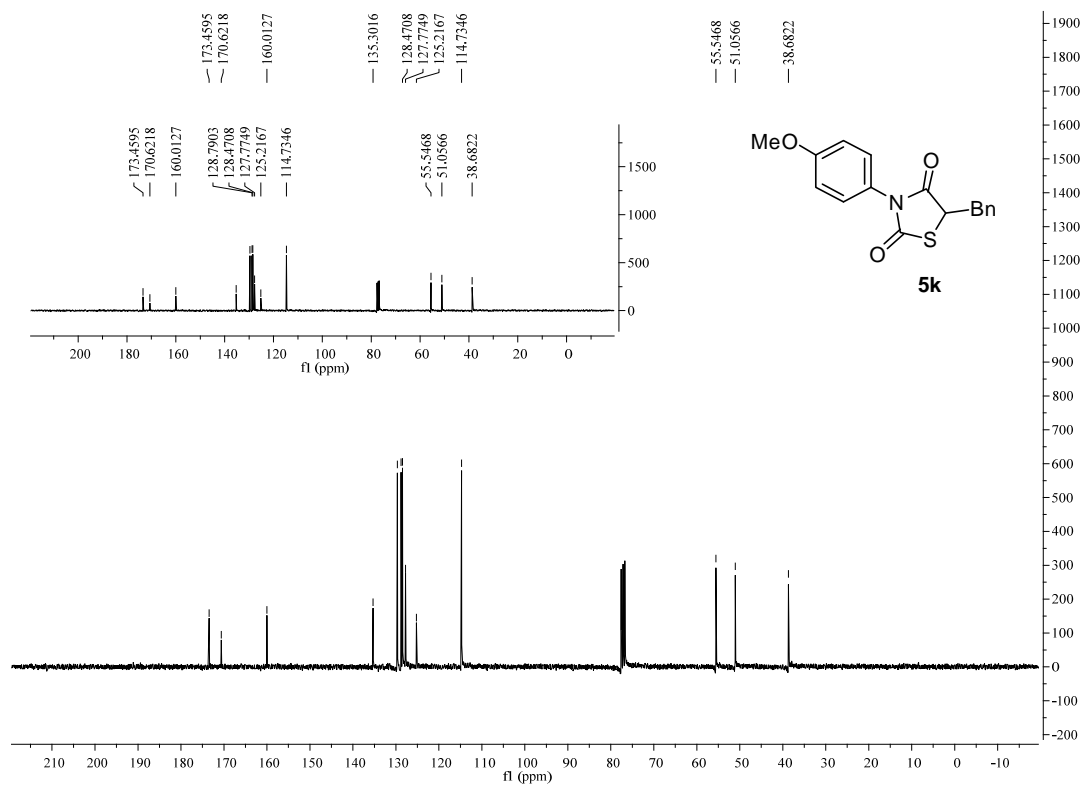

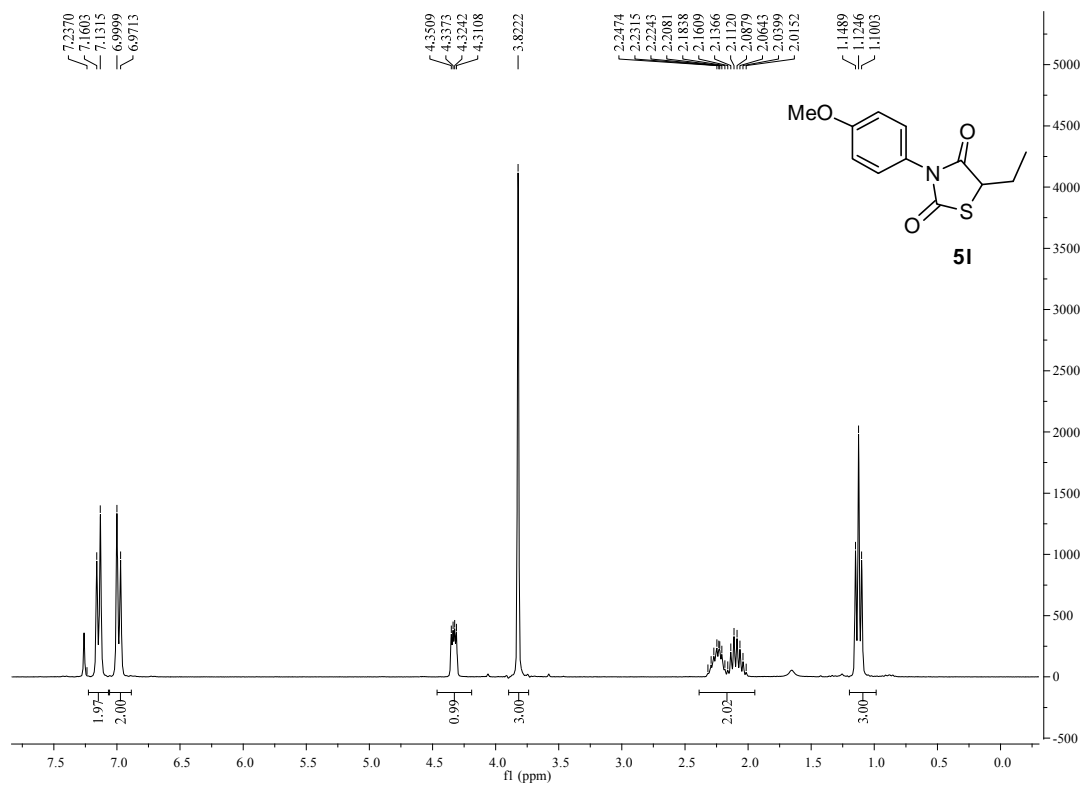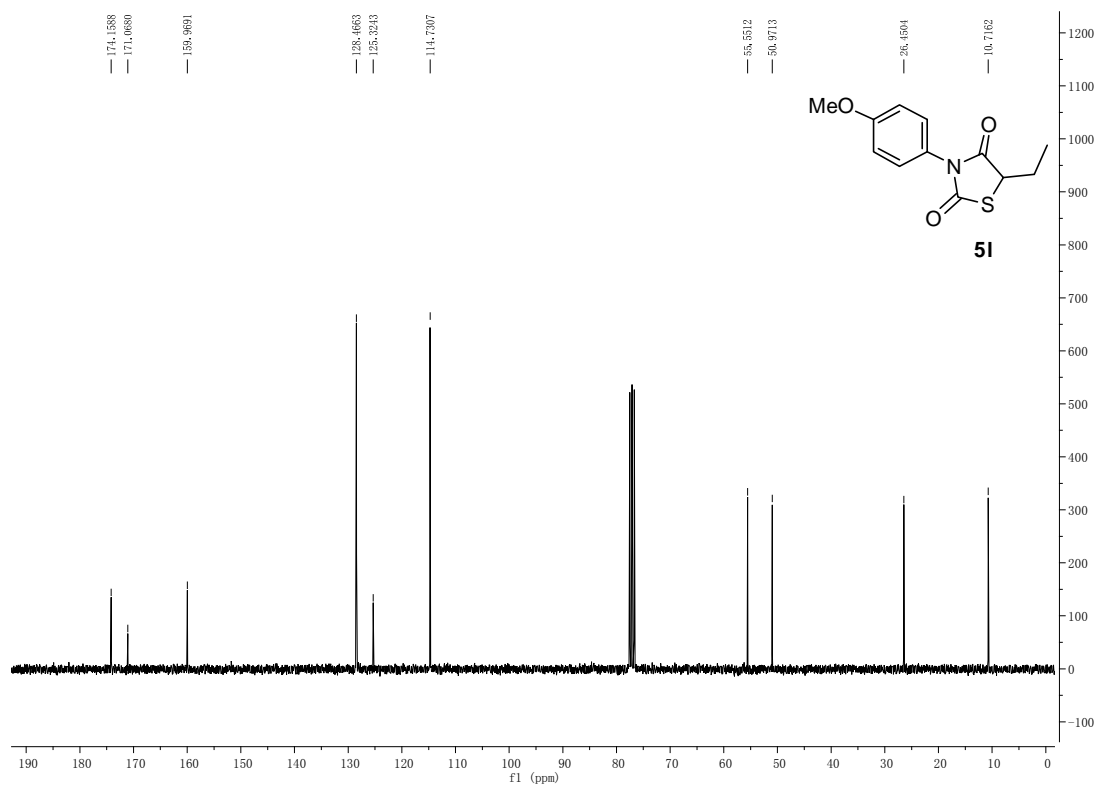

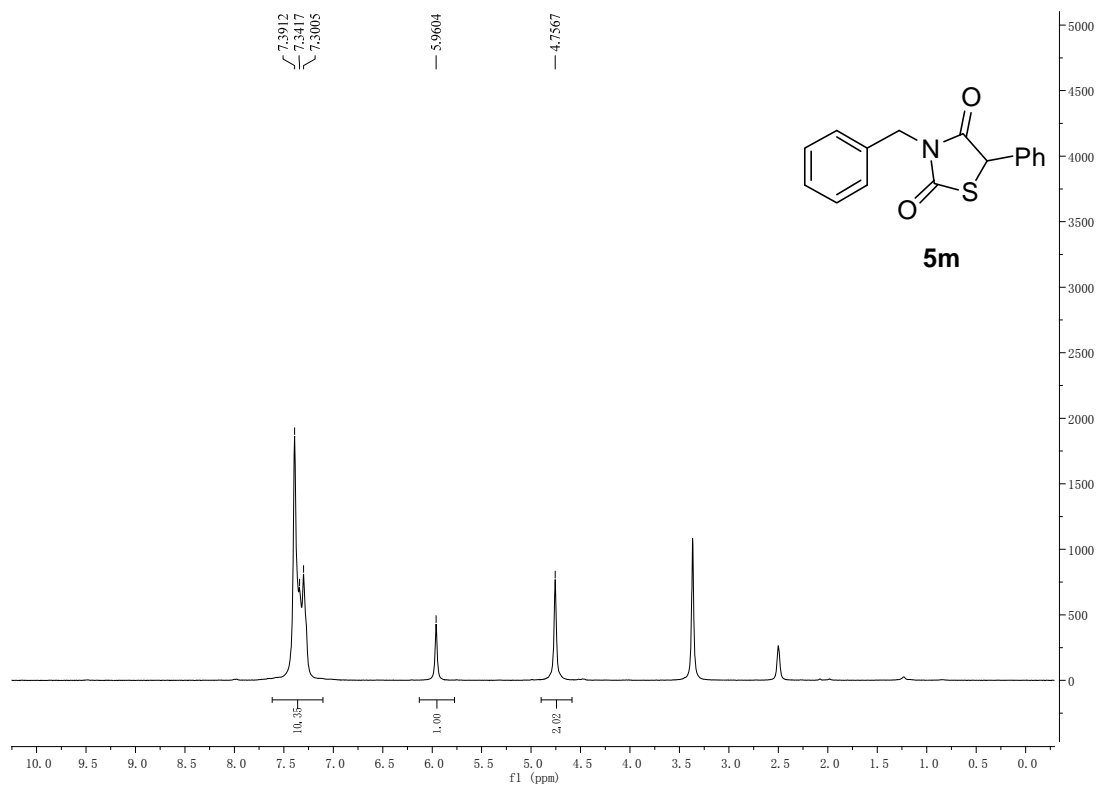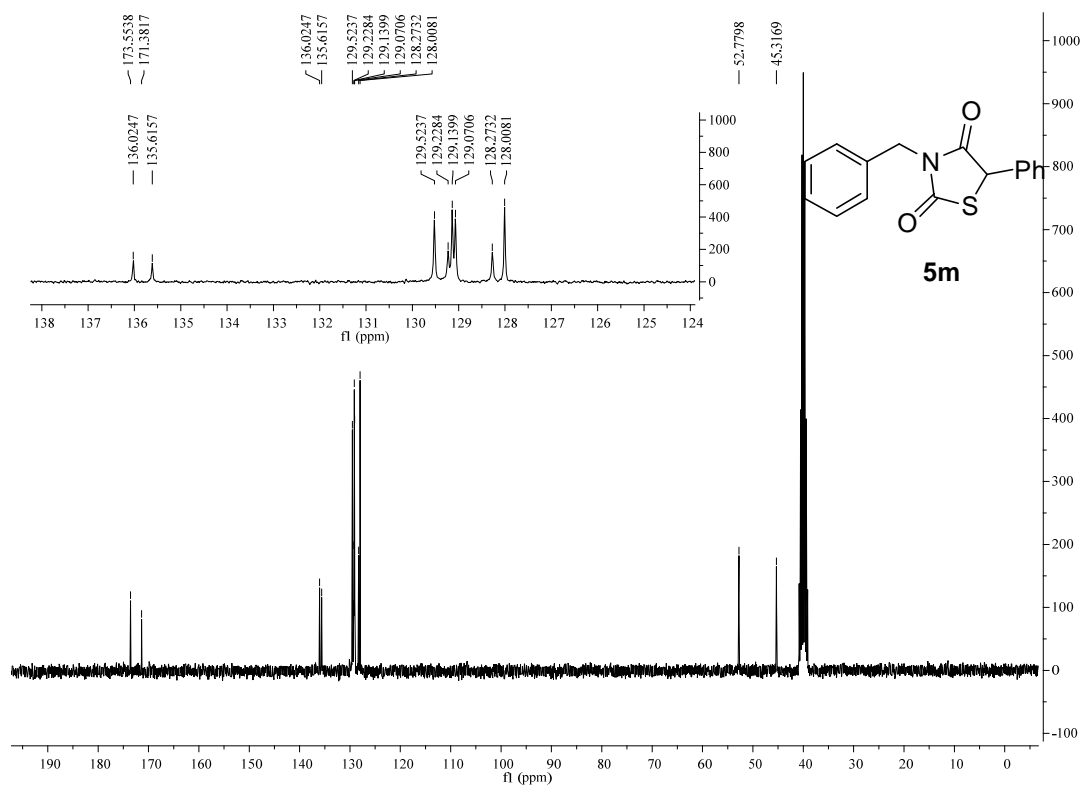

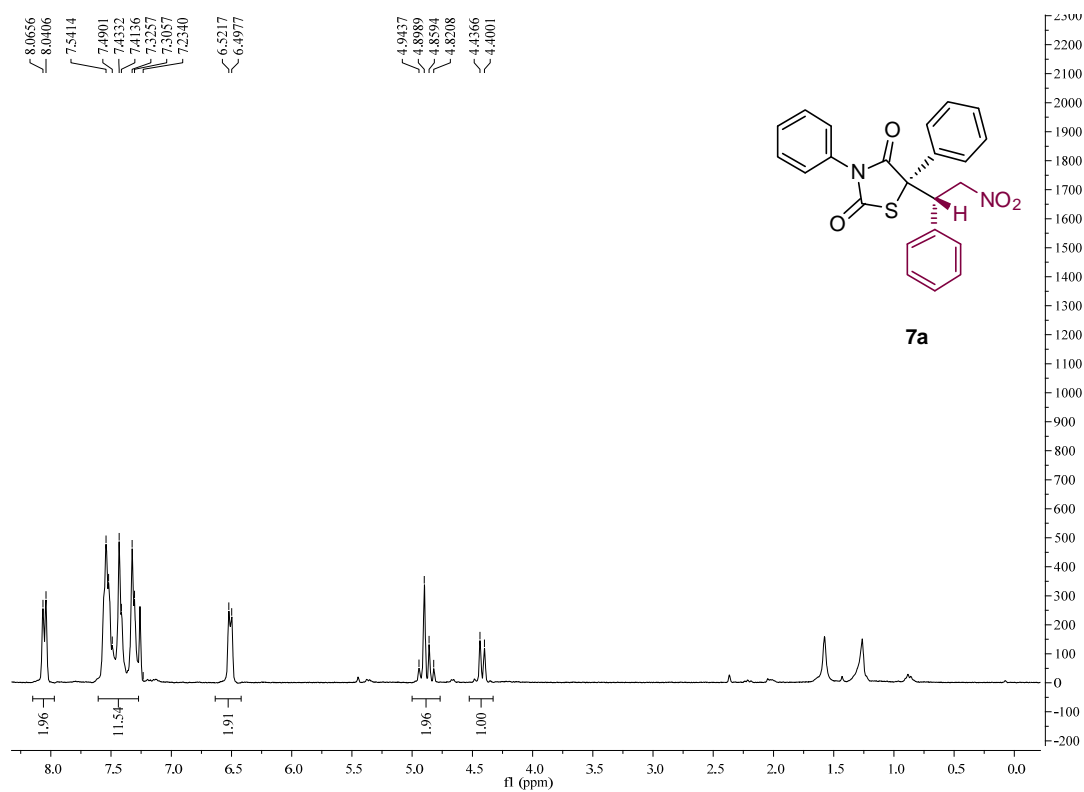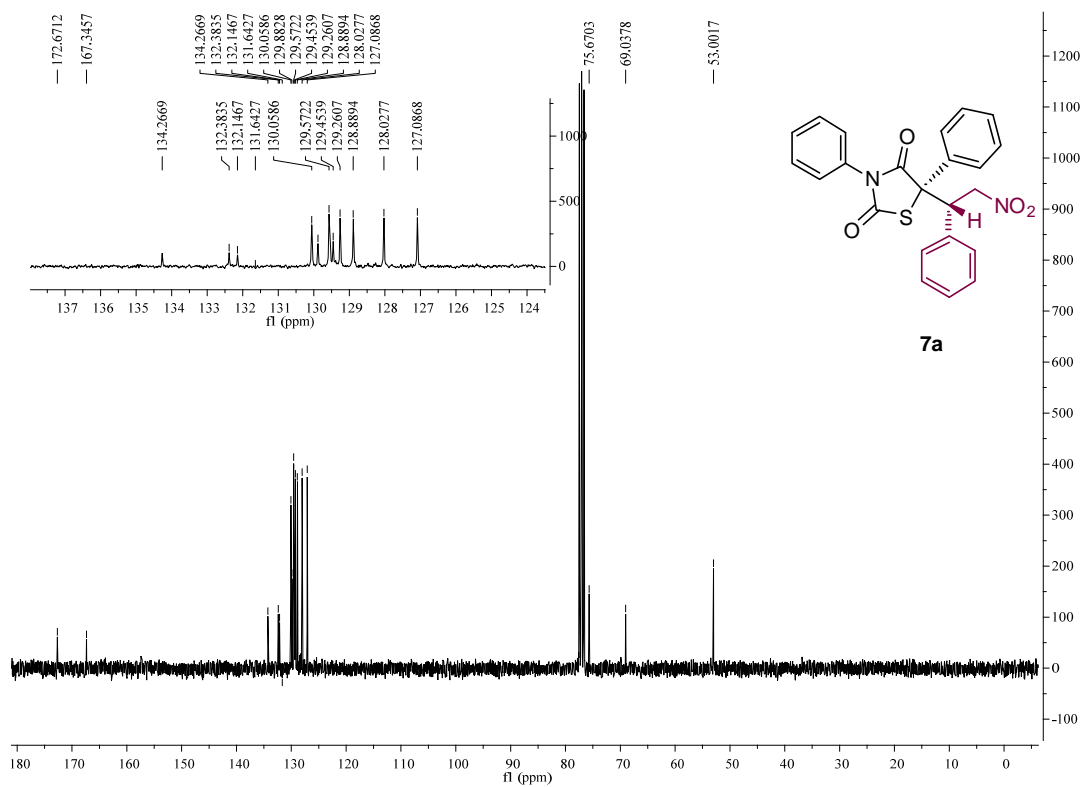

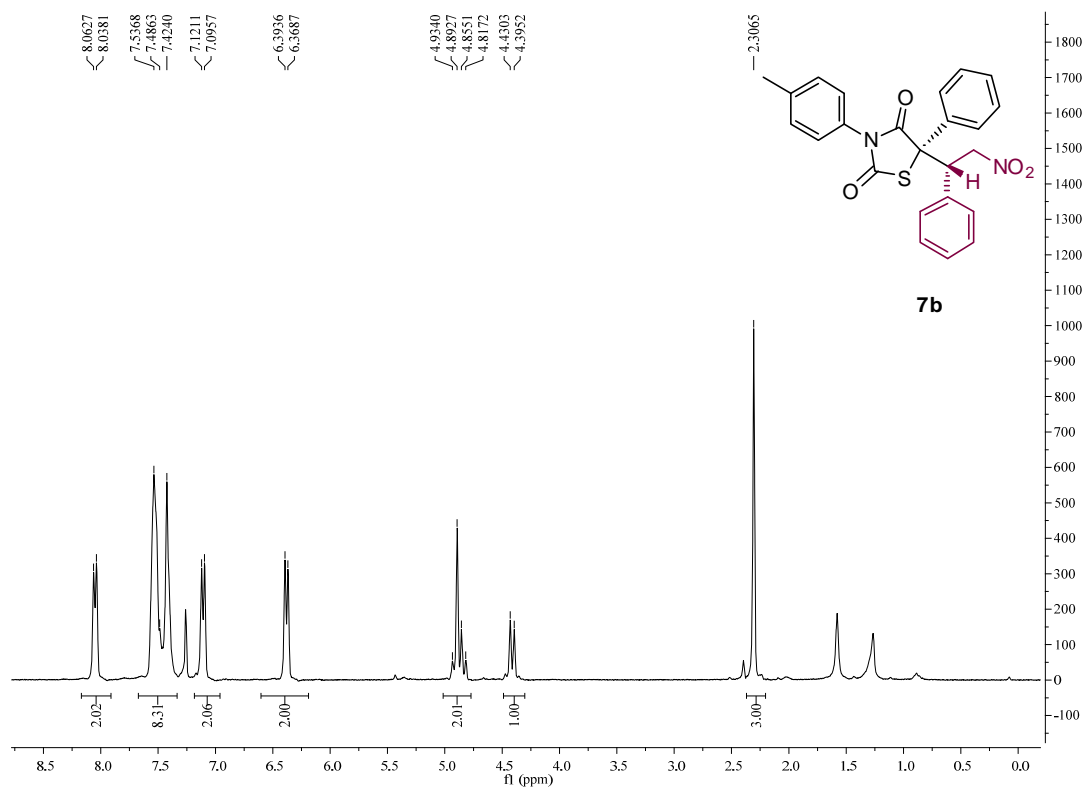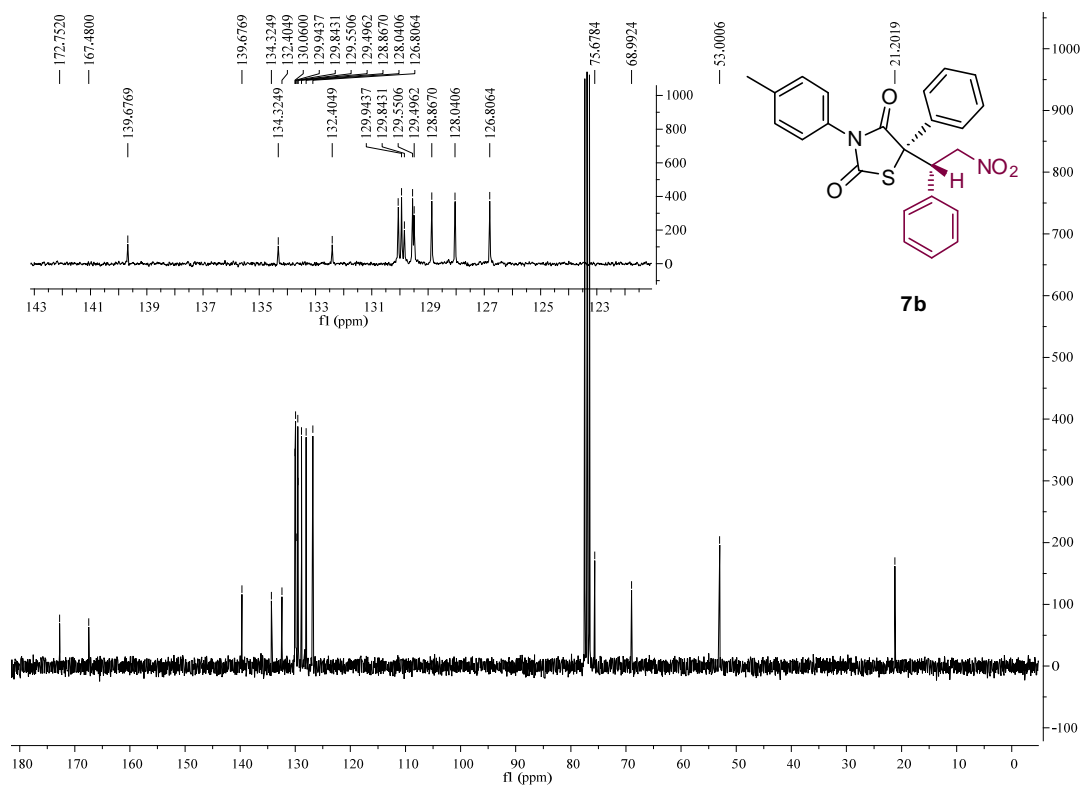

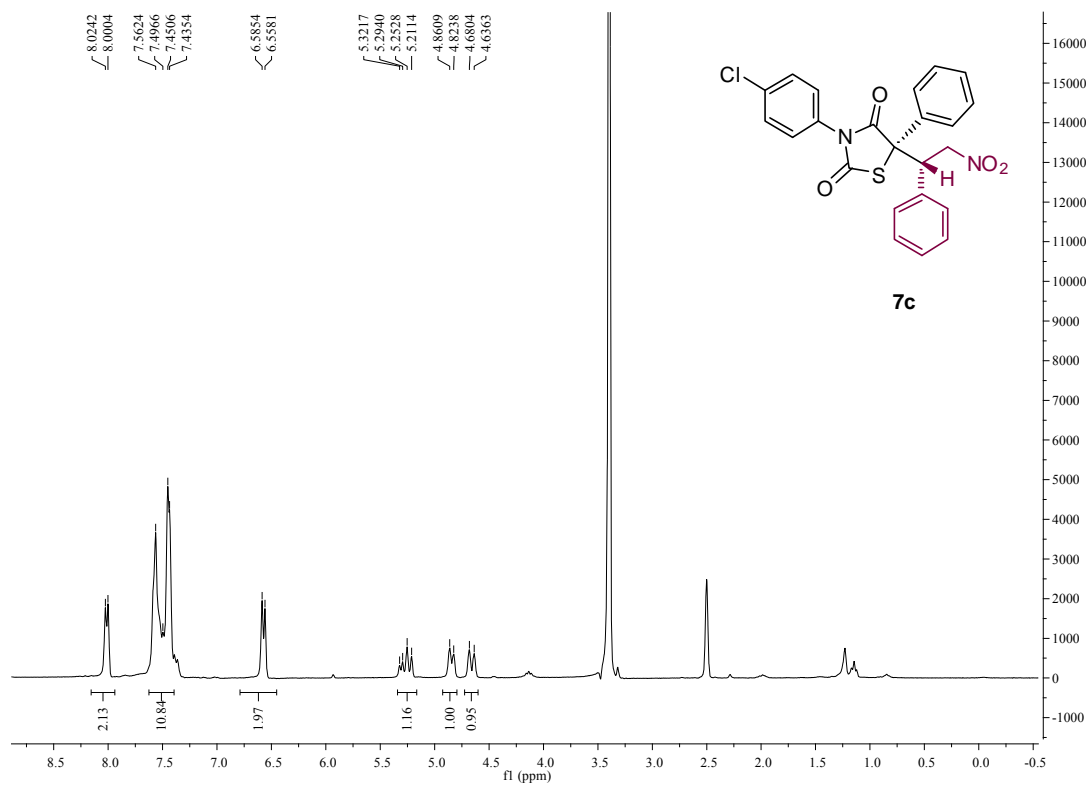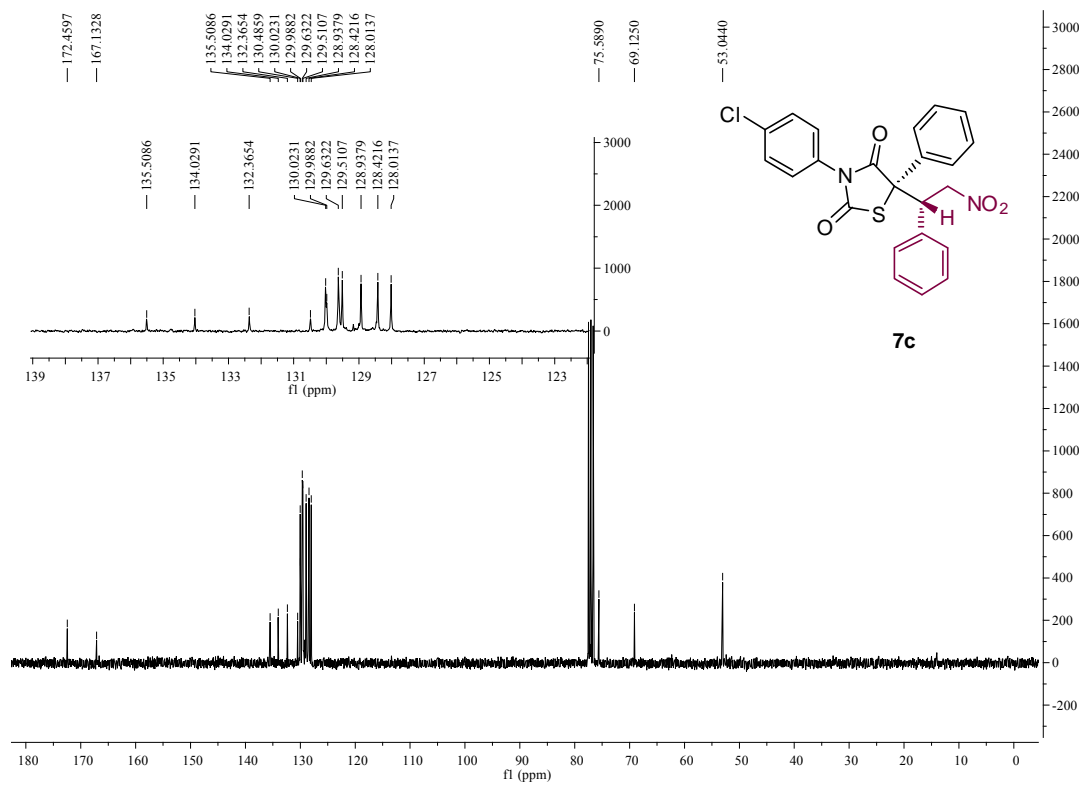

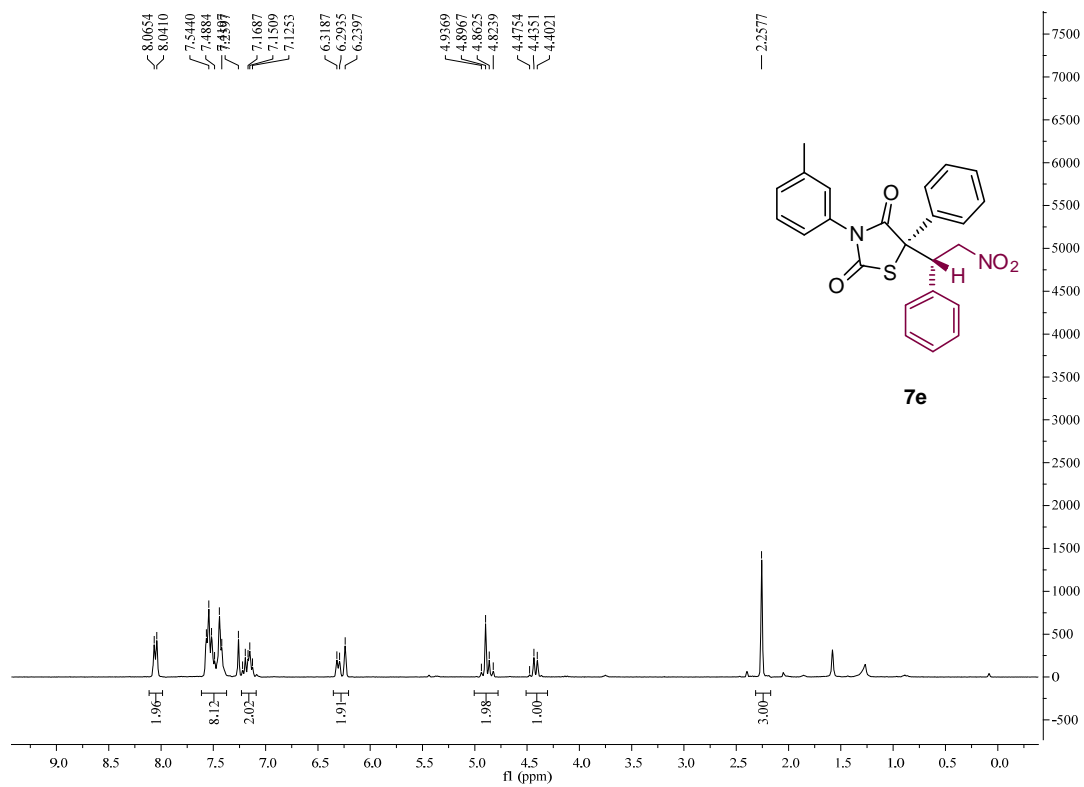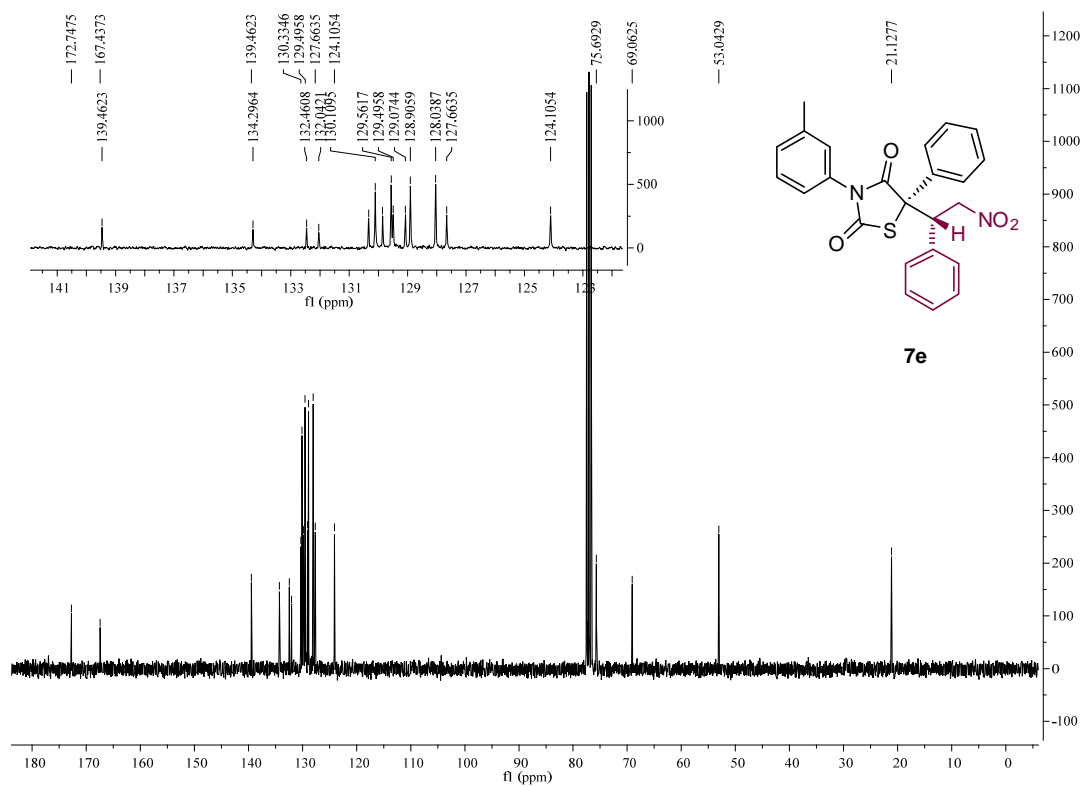



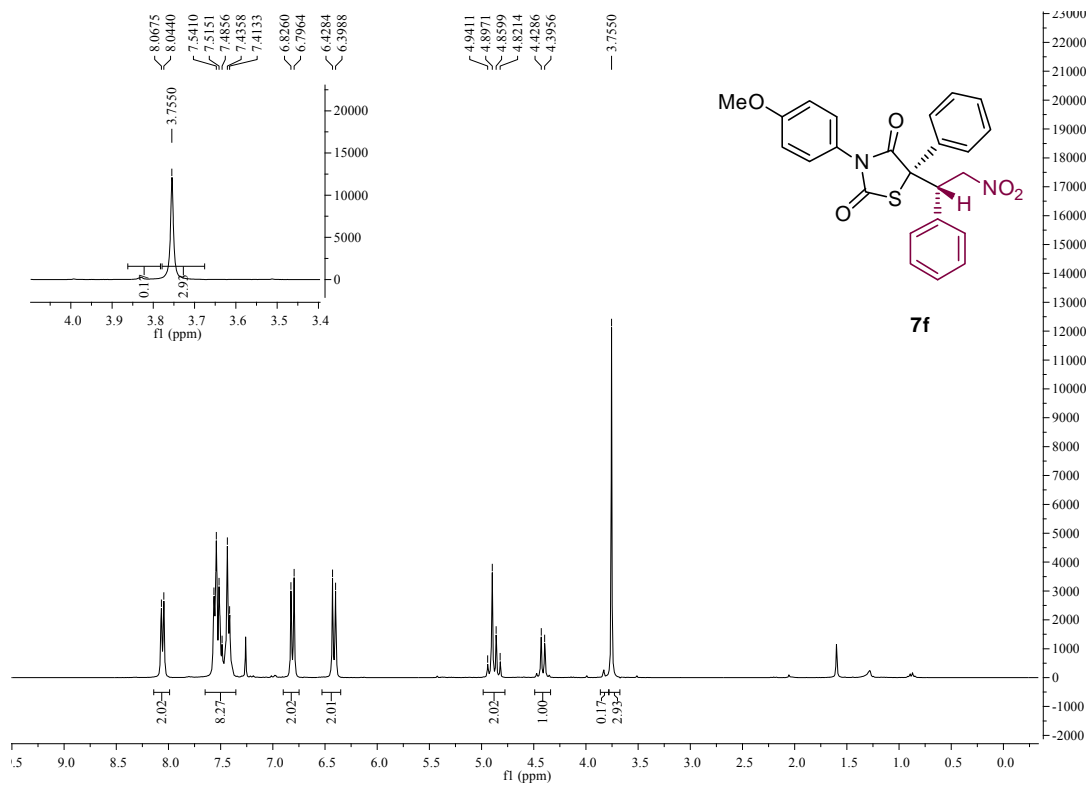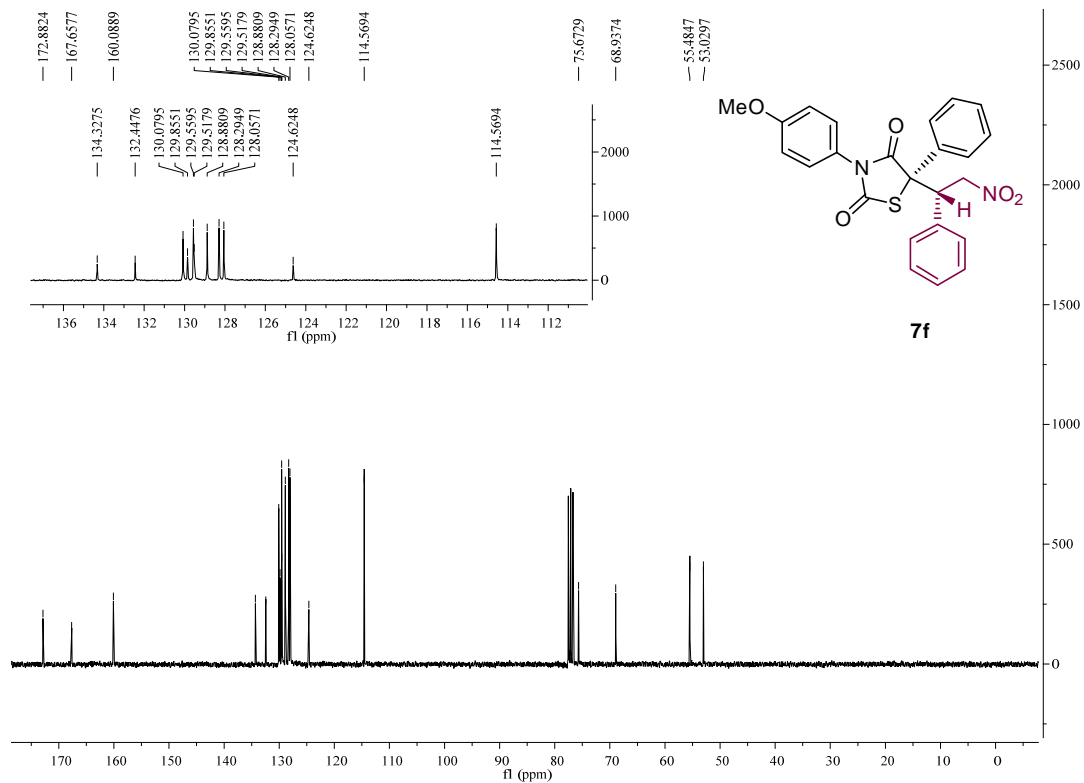

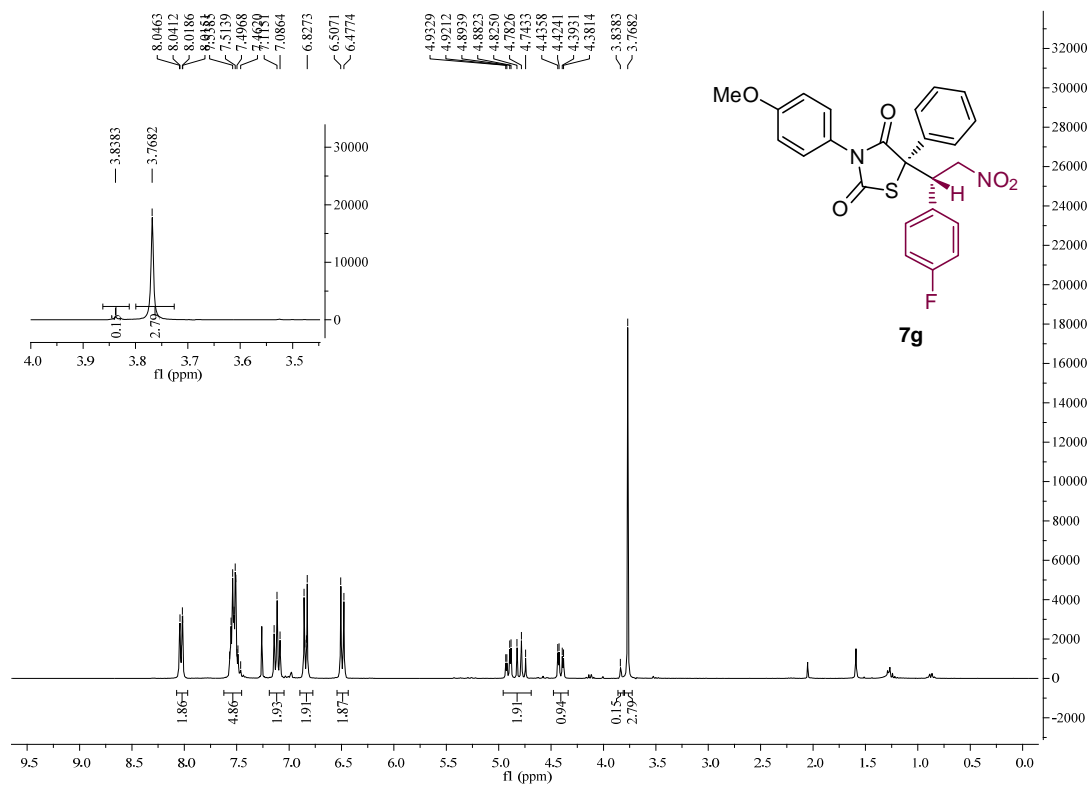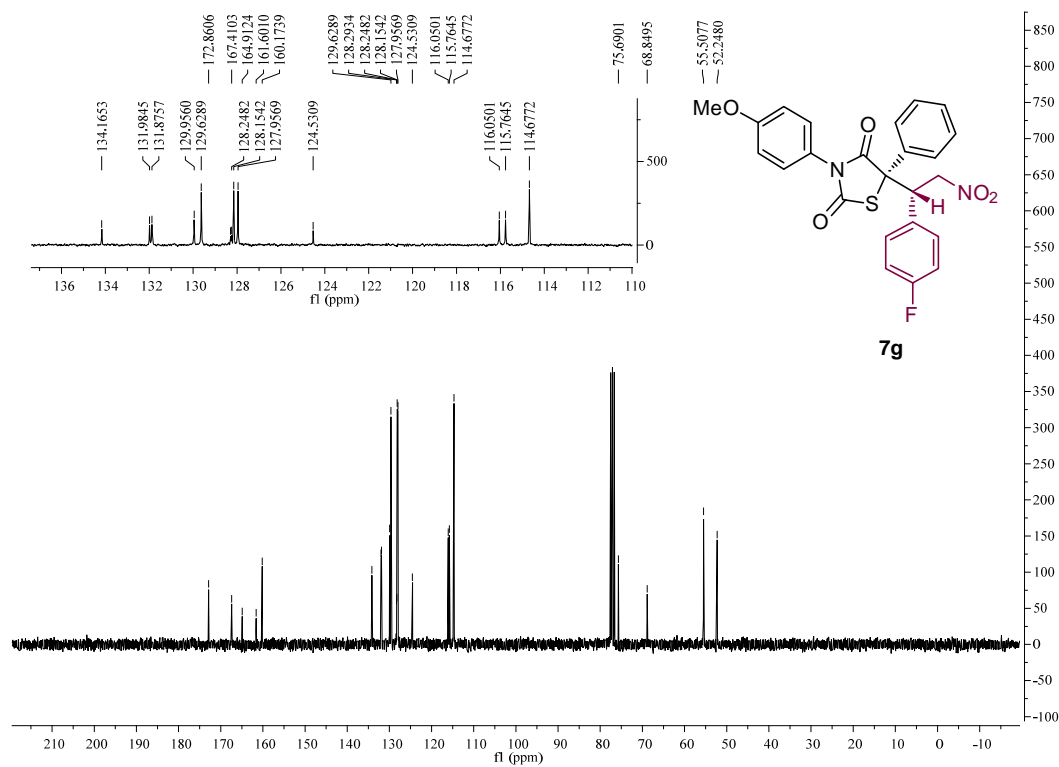

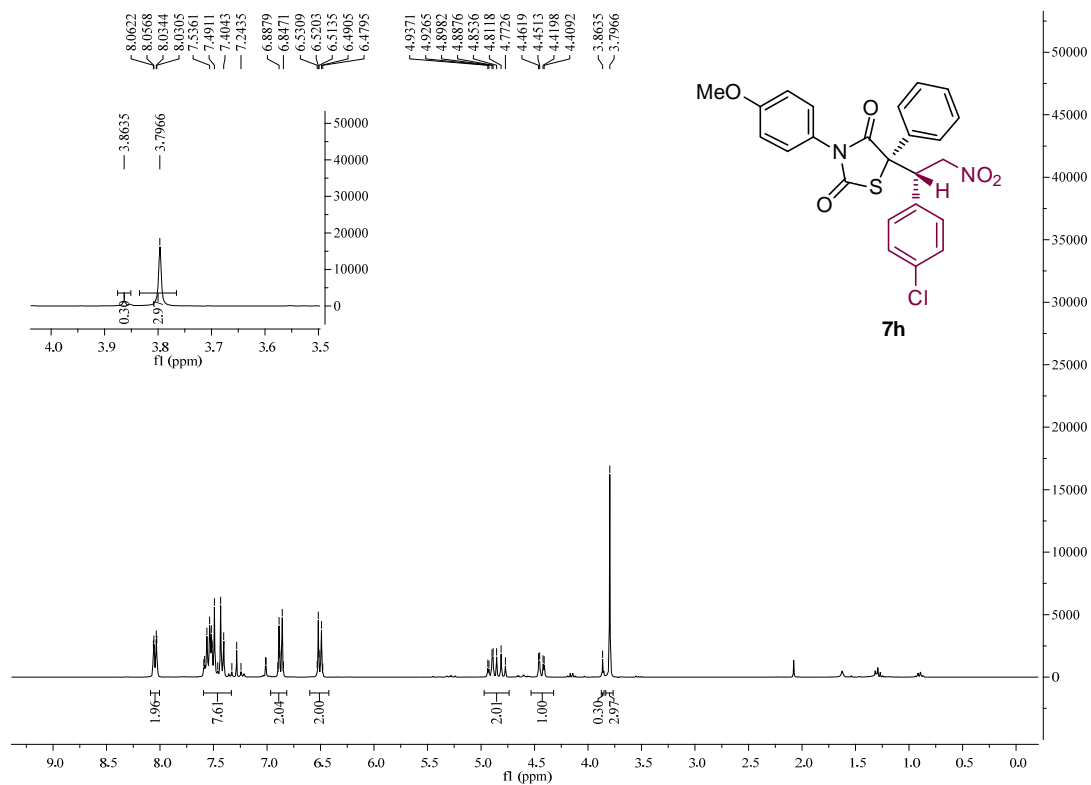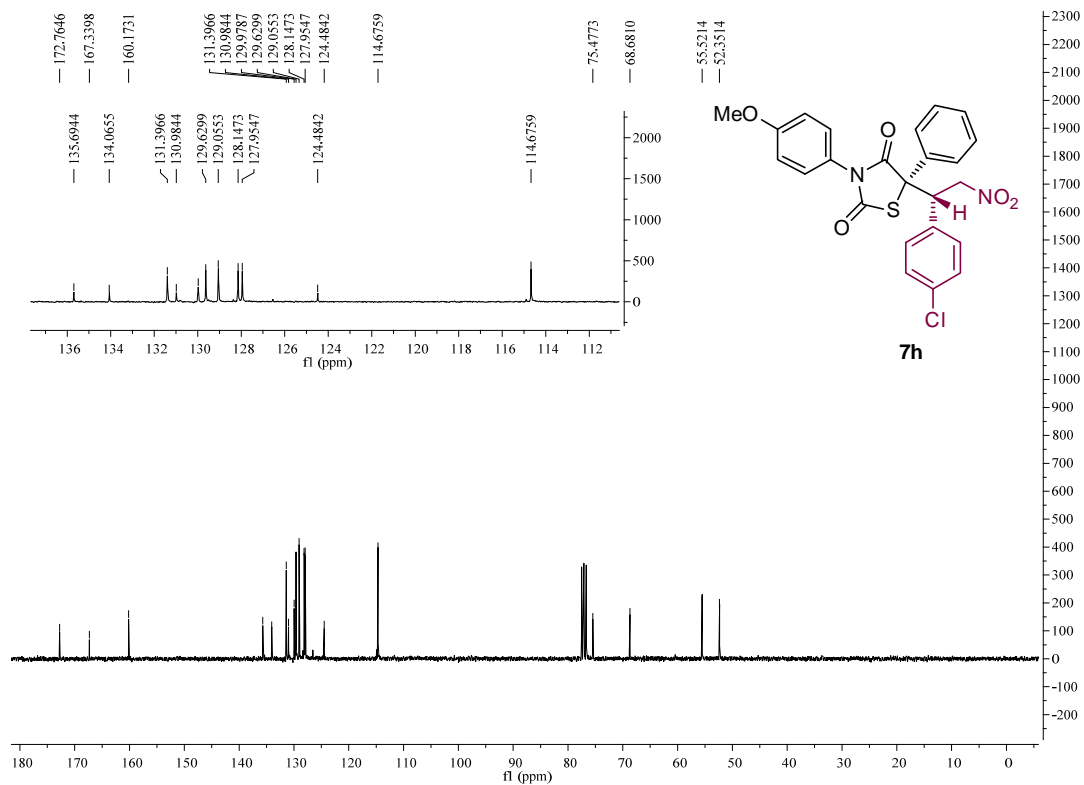

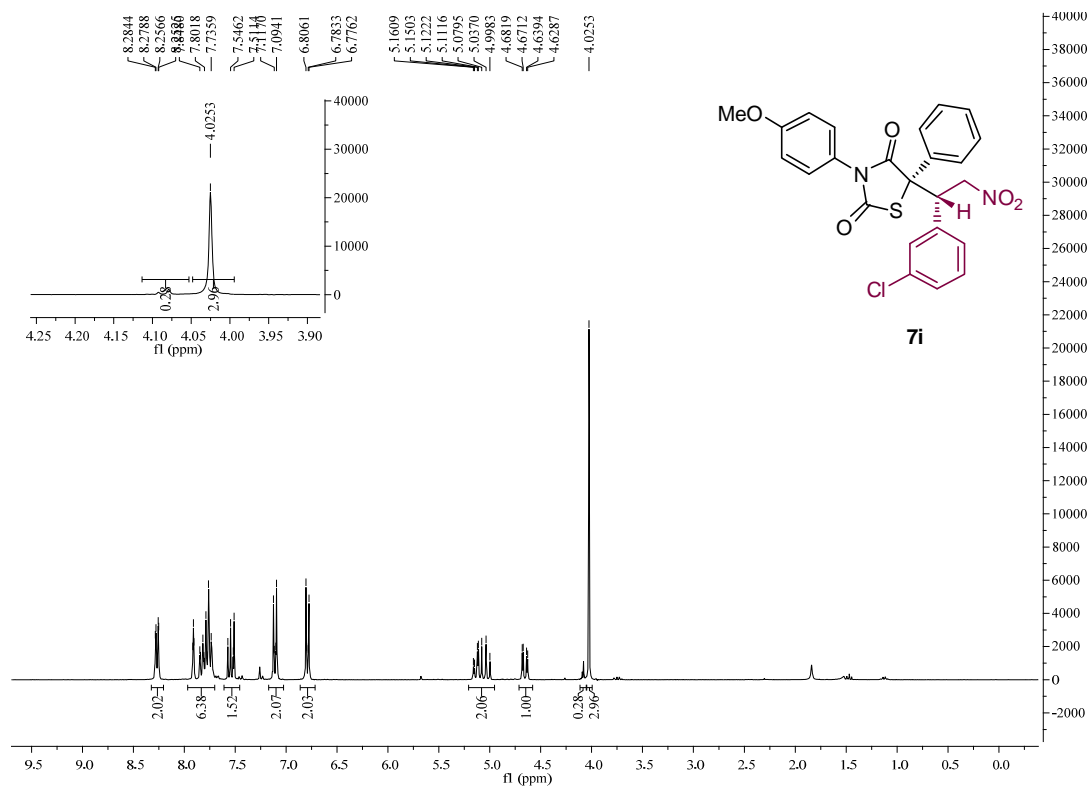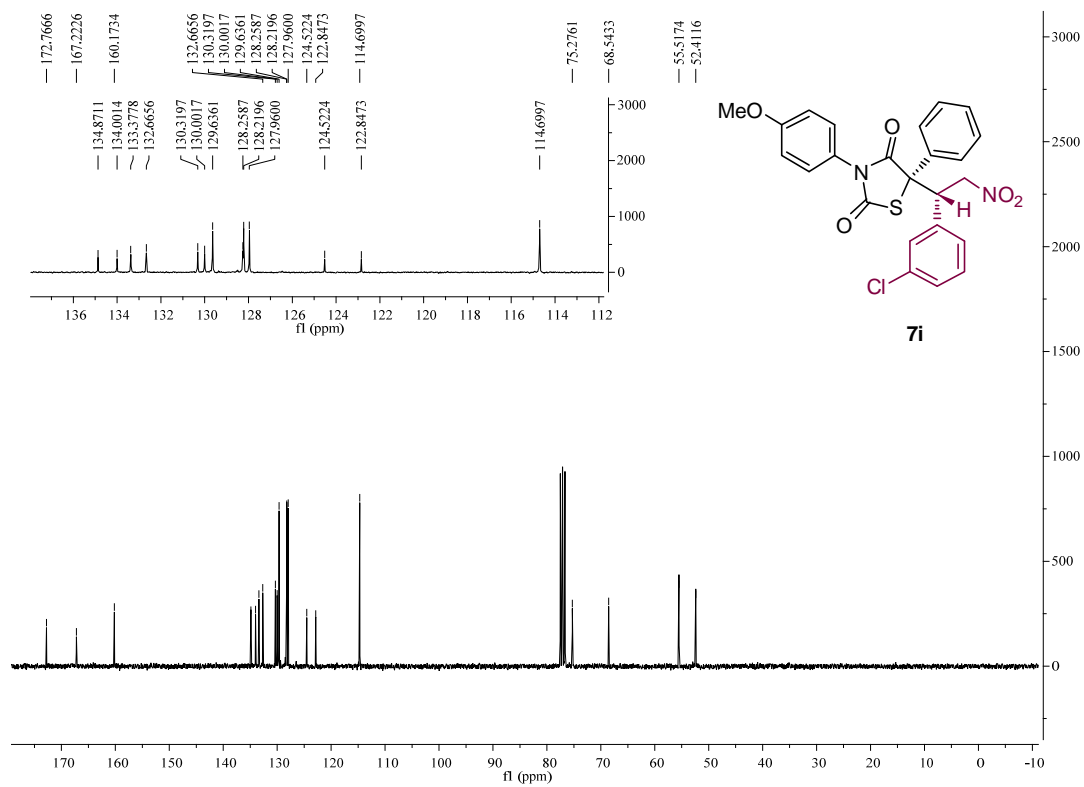

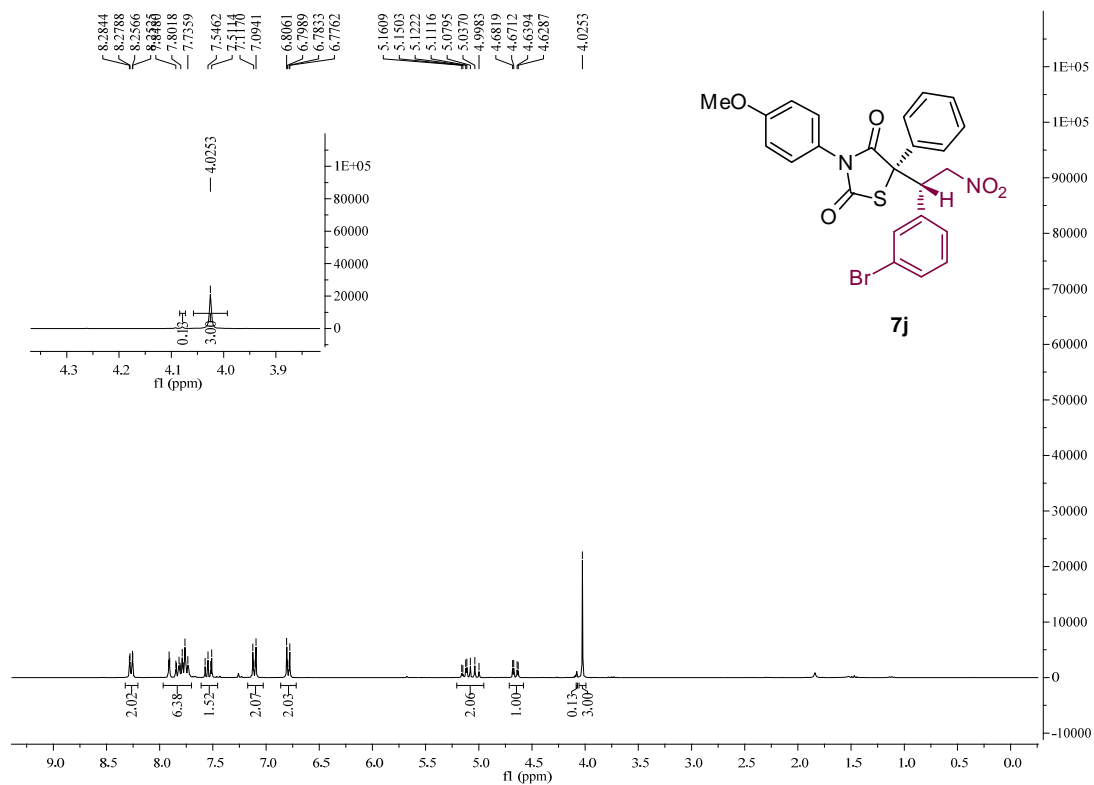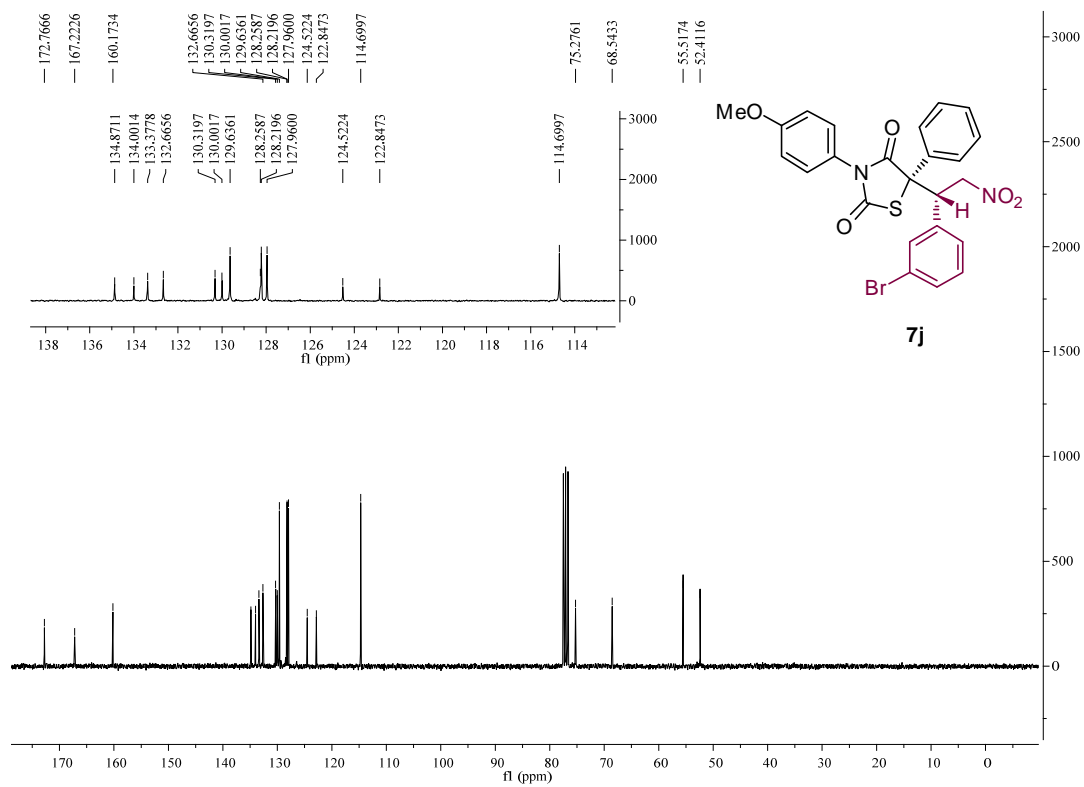

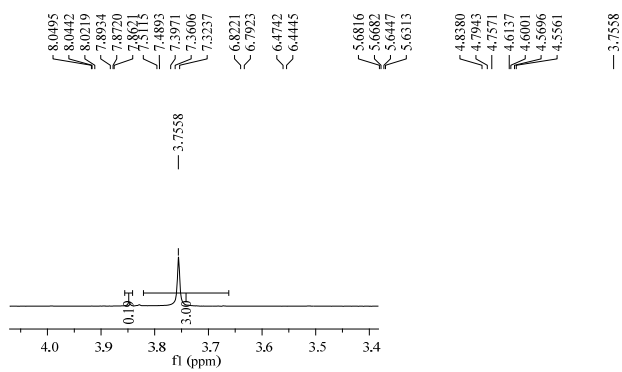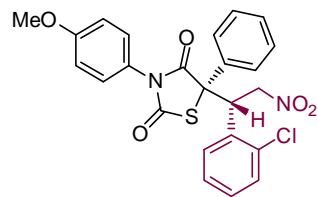

7k

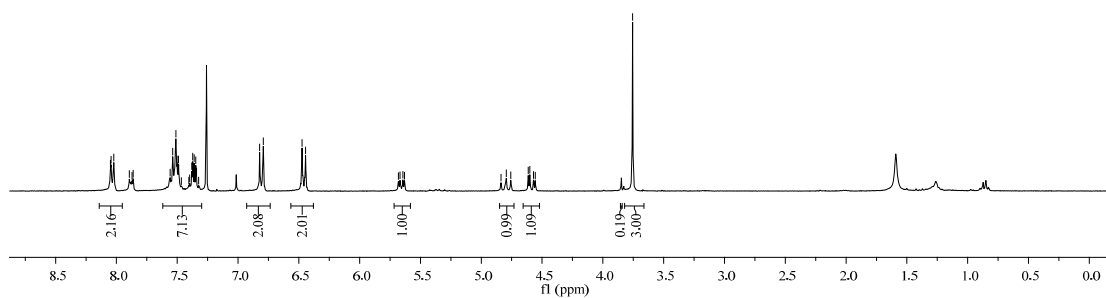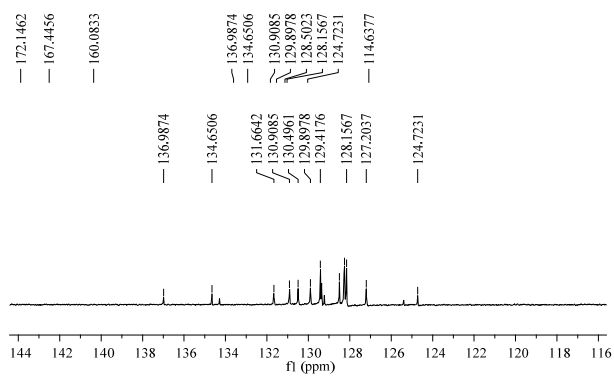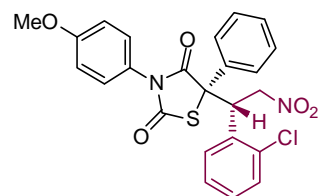

7k

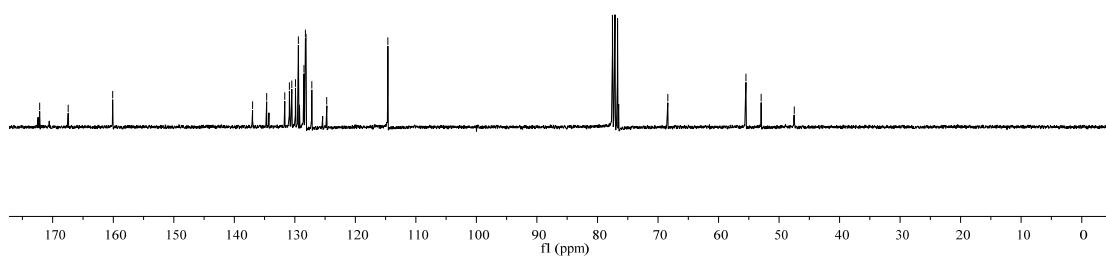

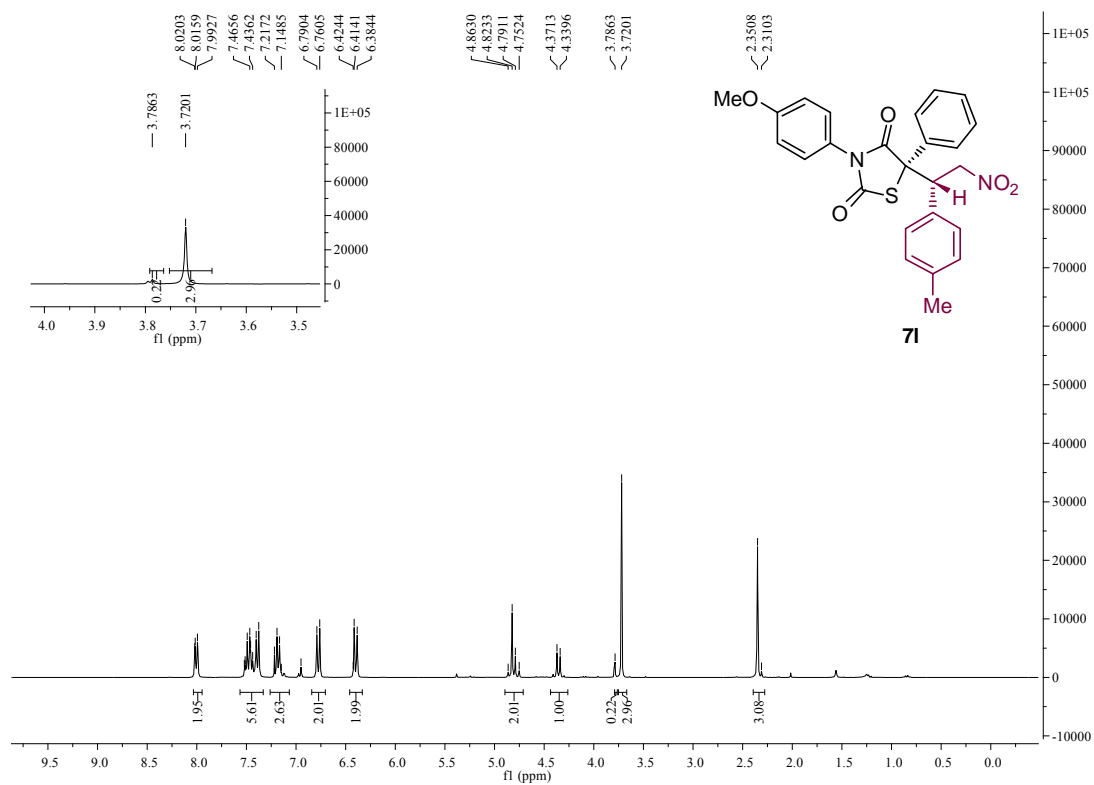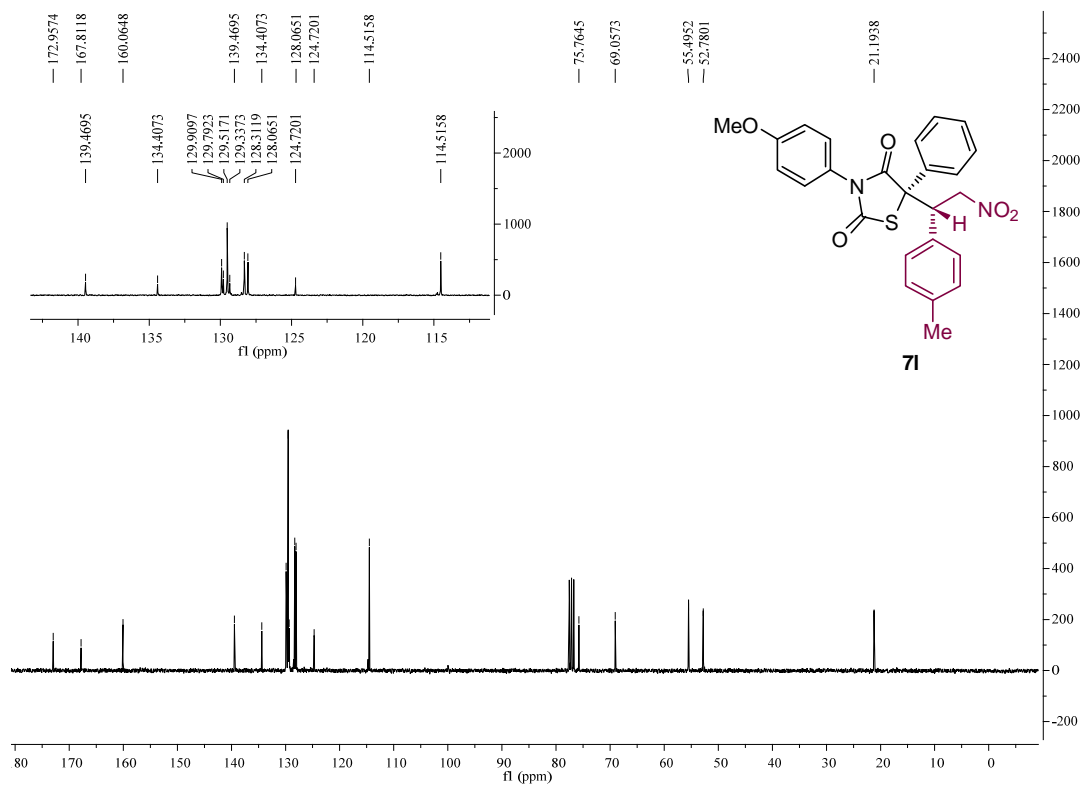

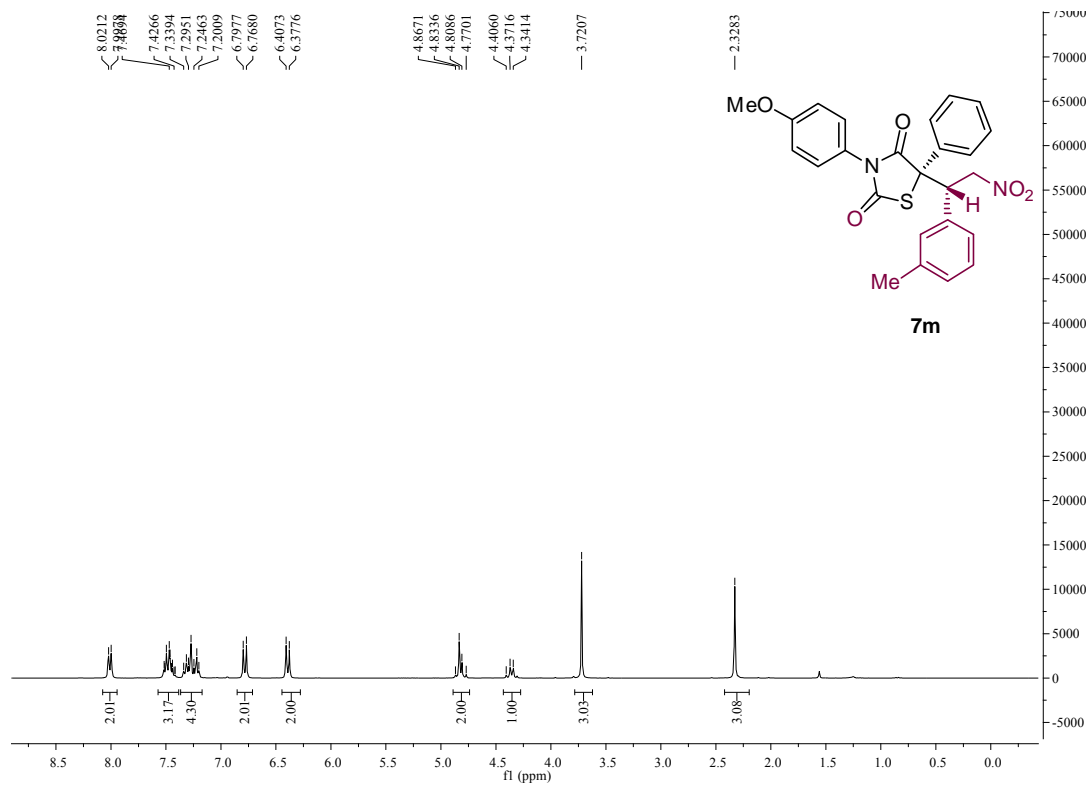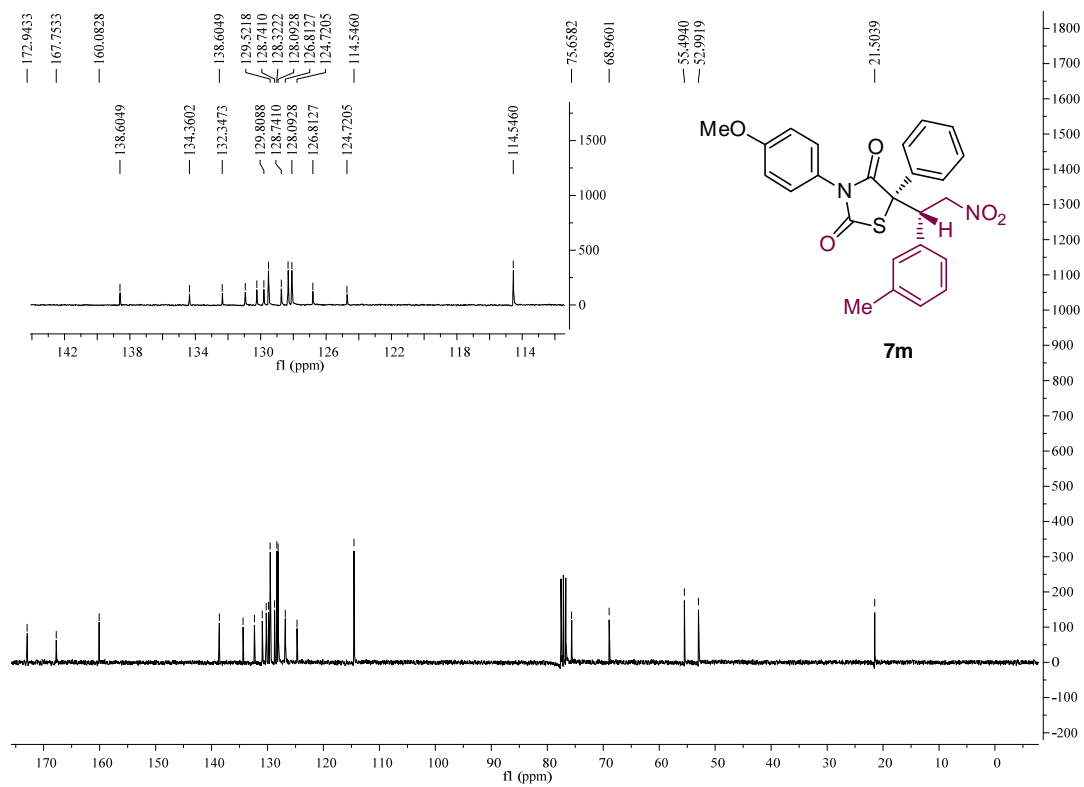



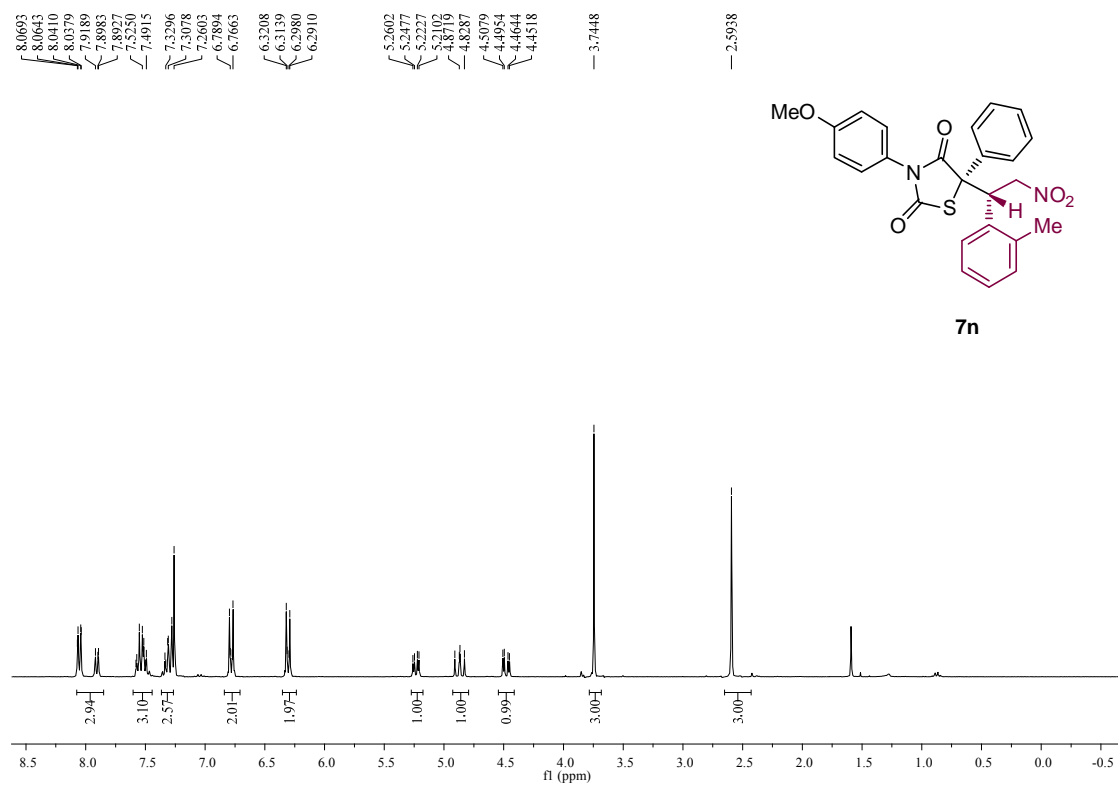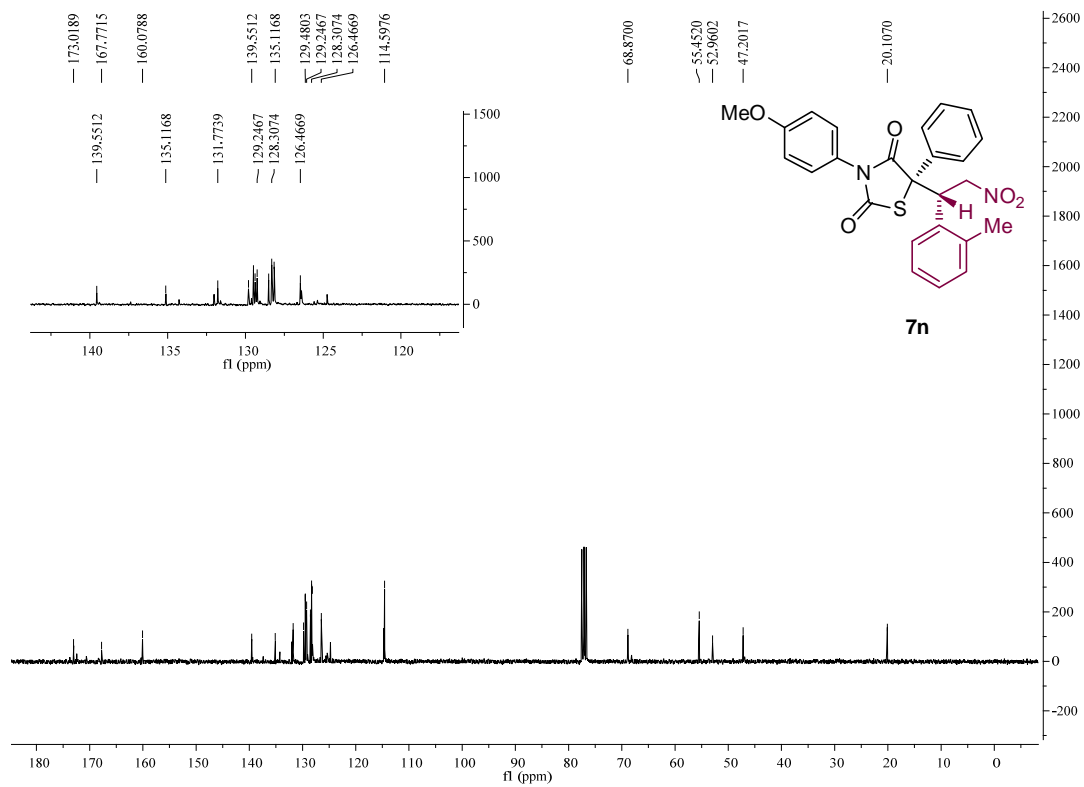

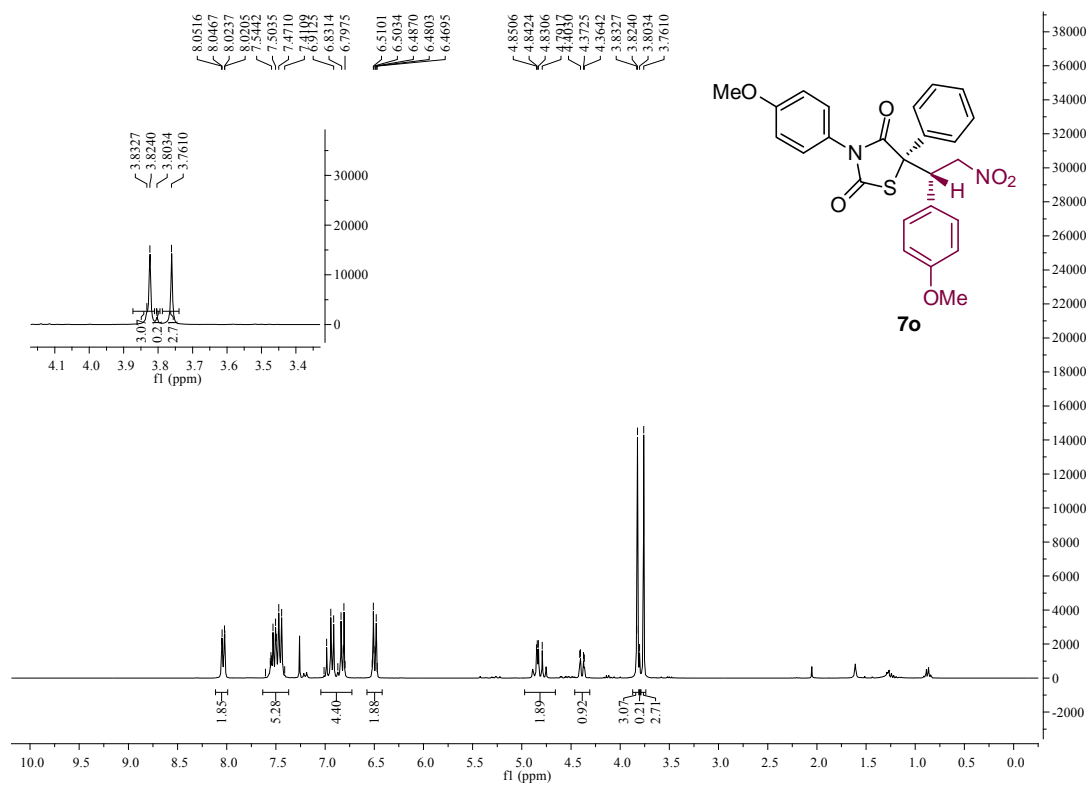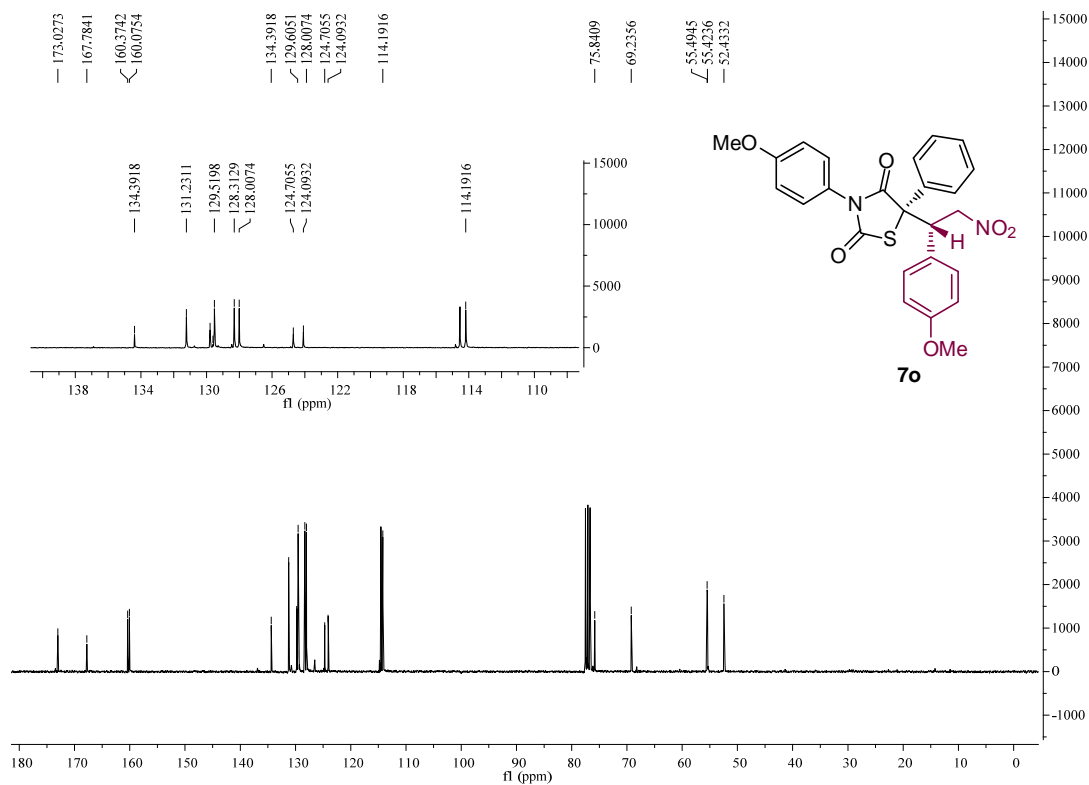

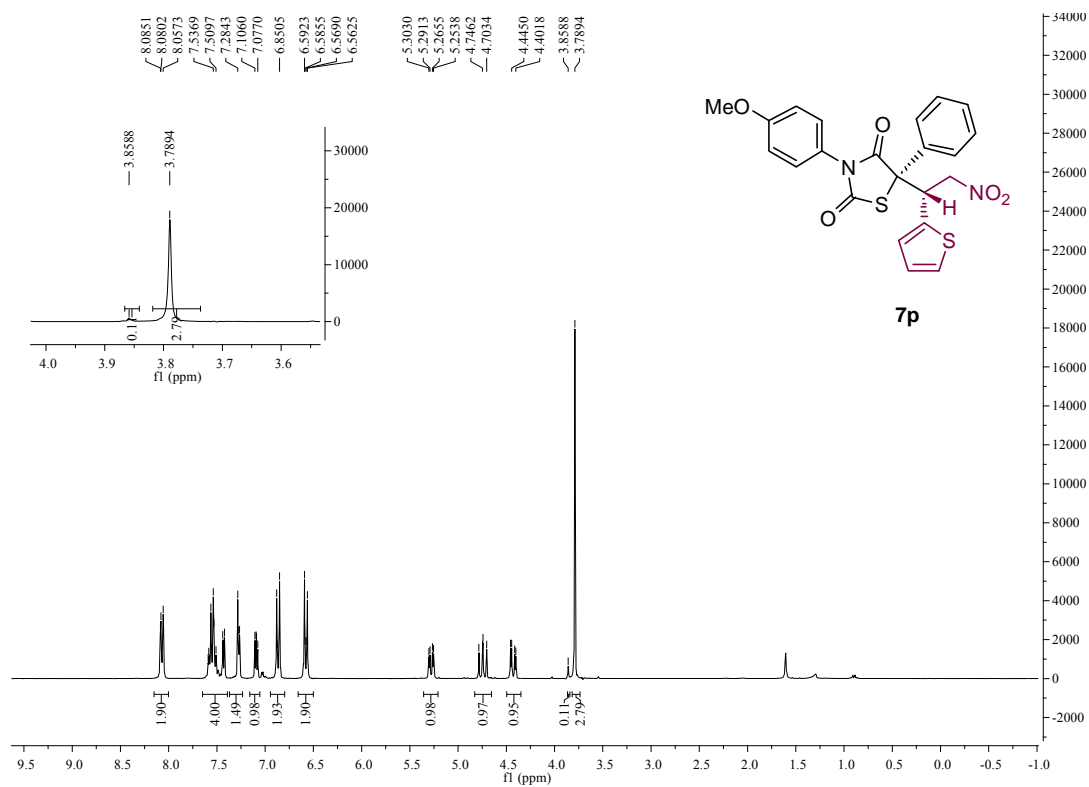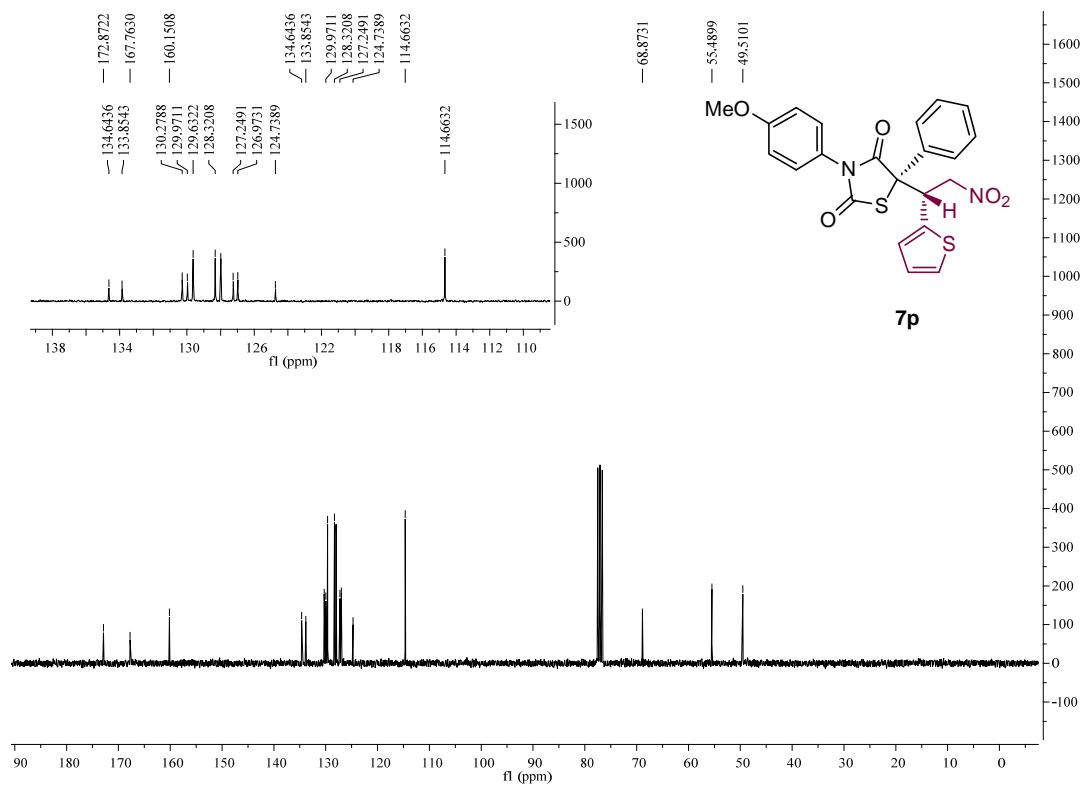

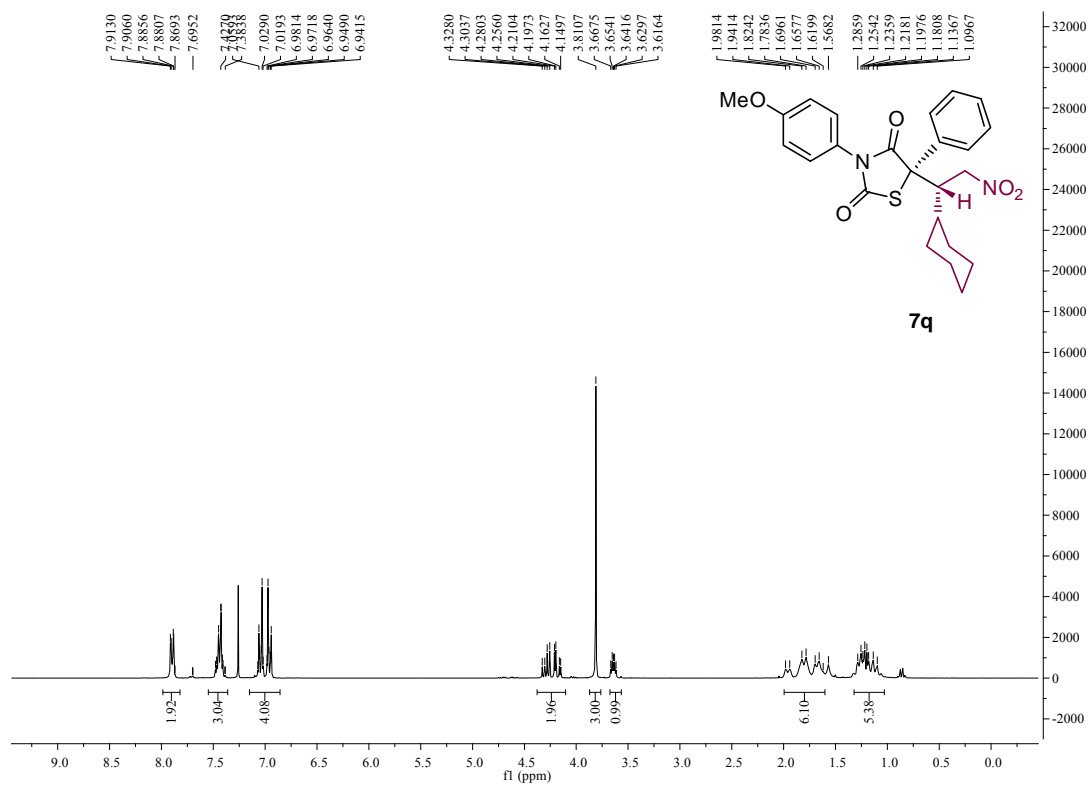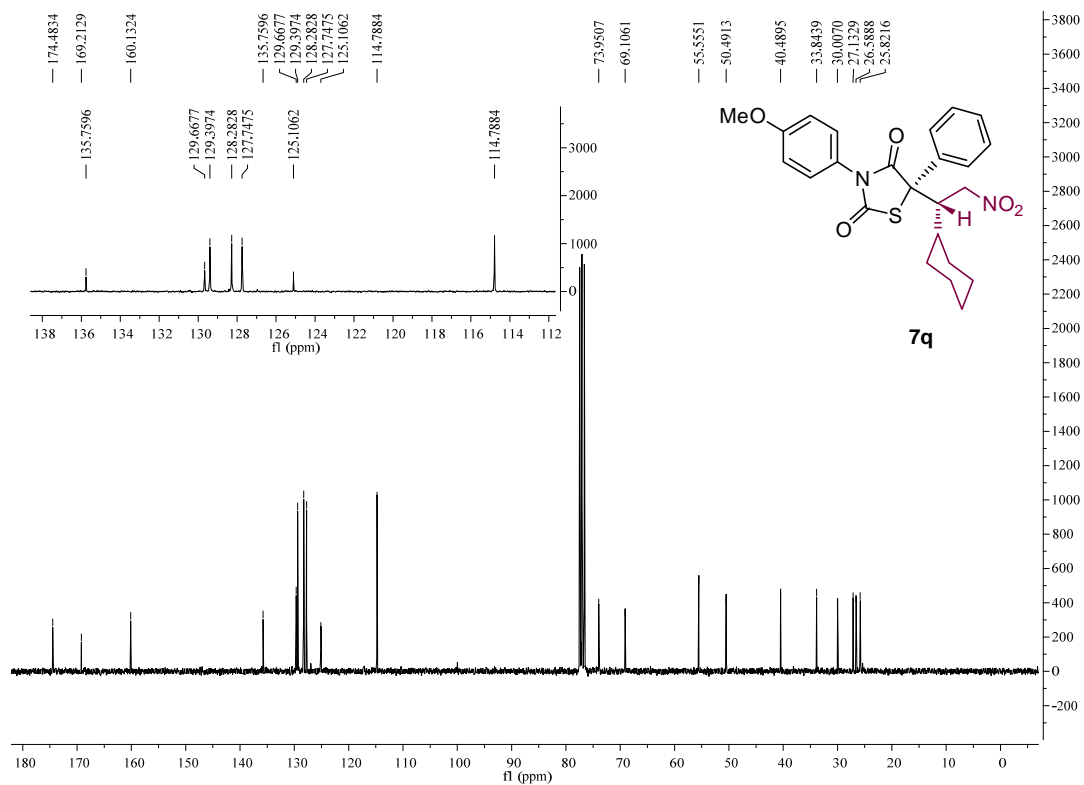

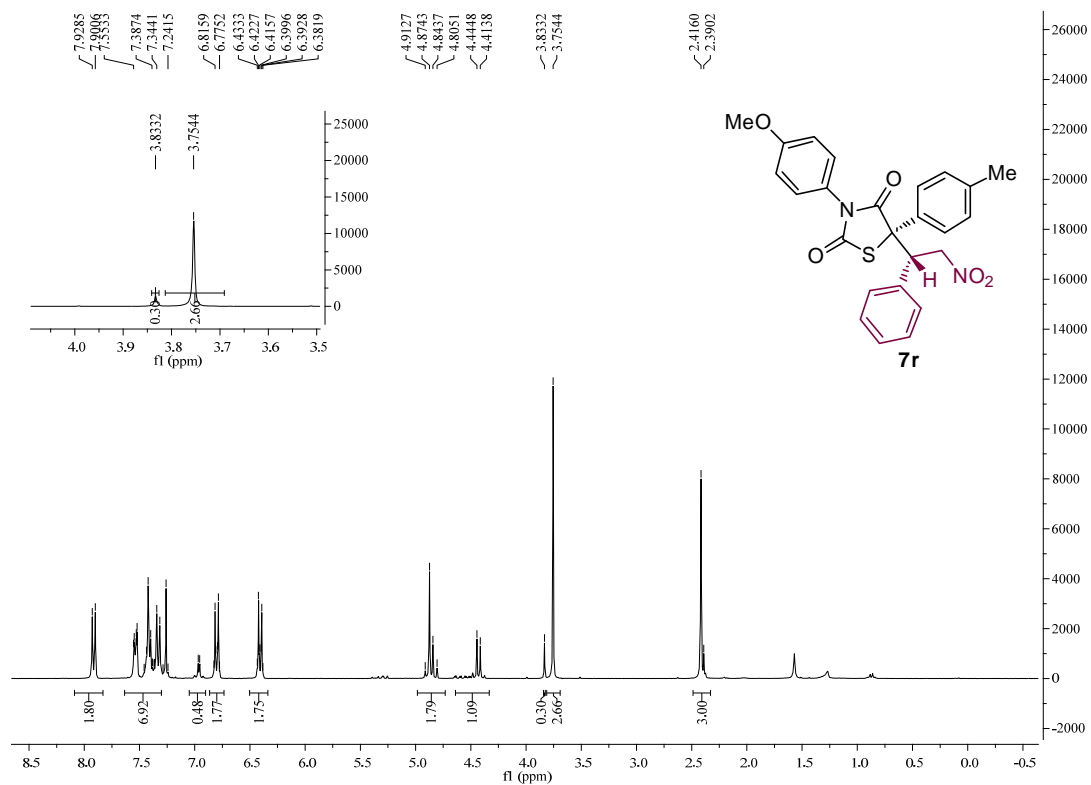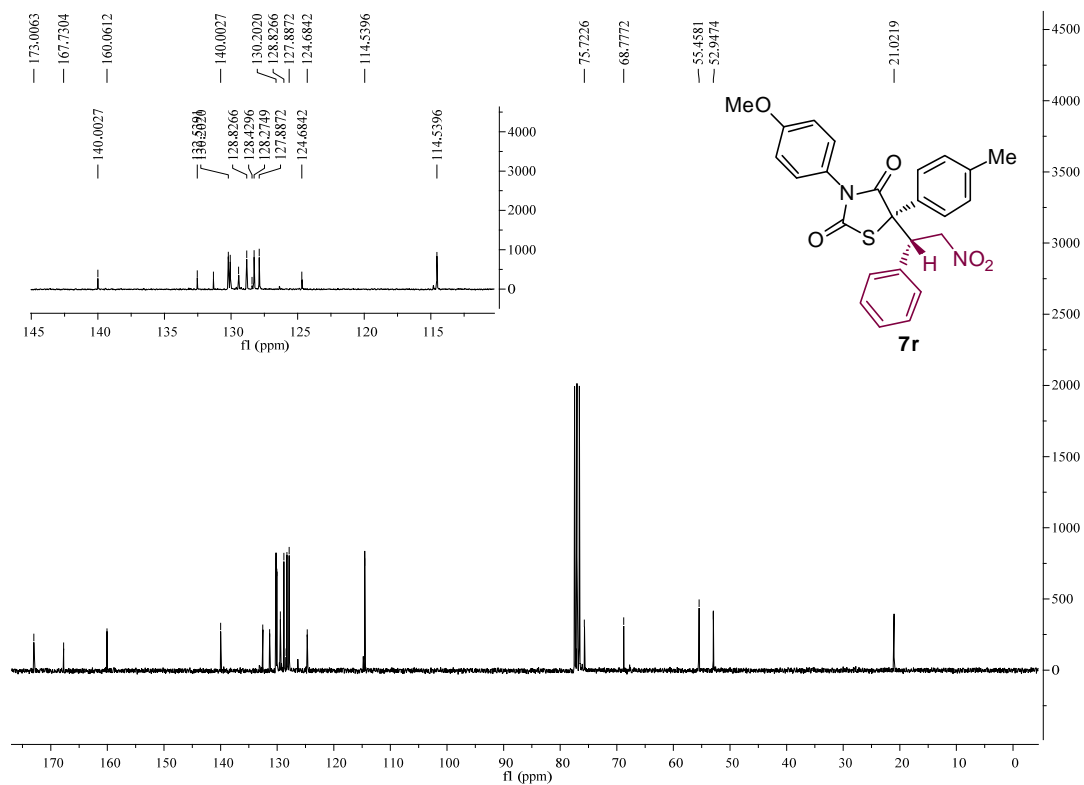

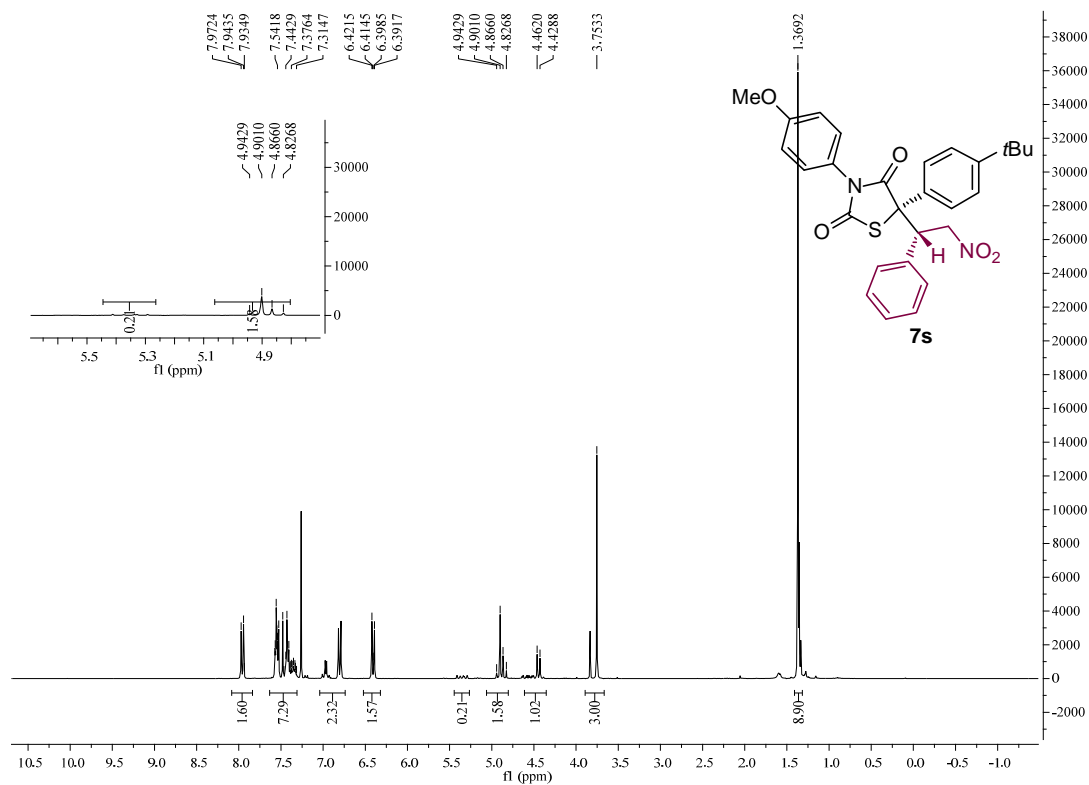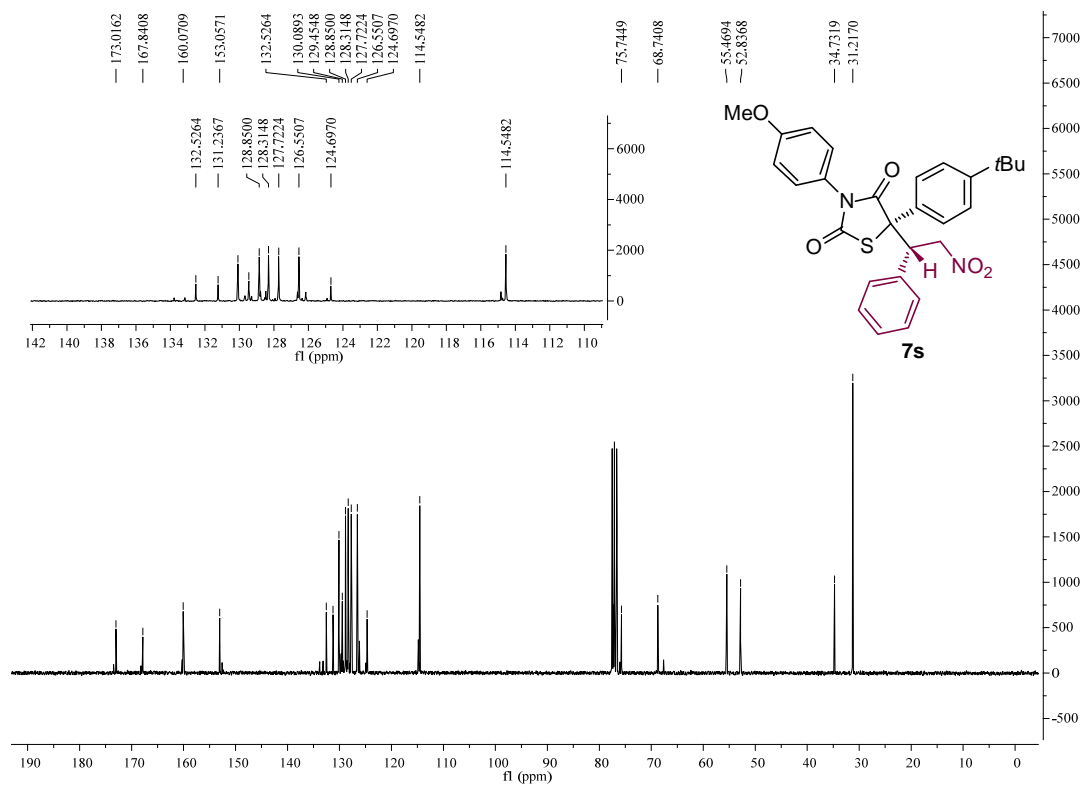

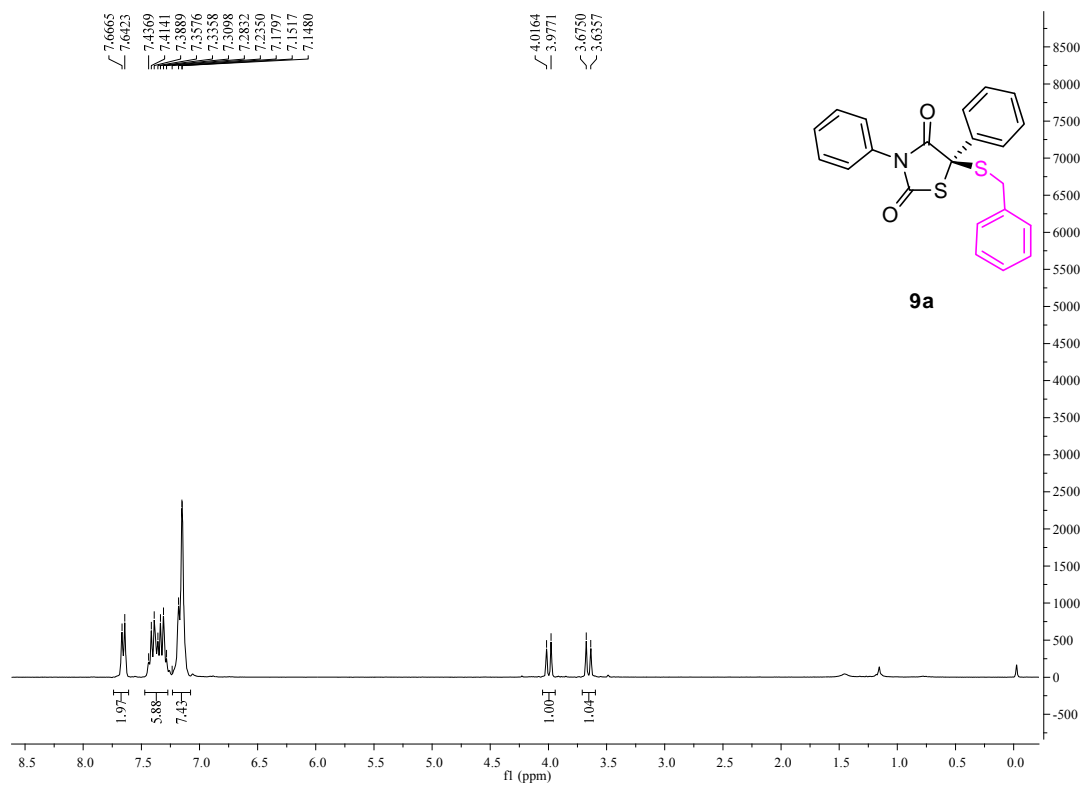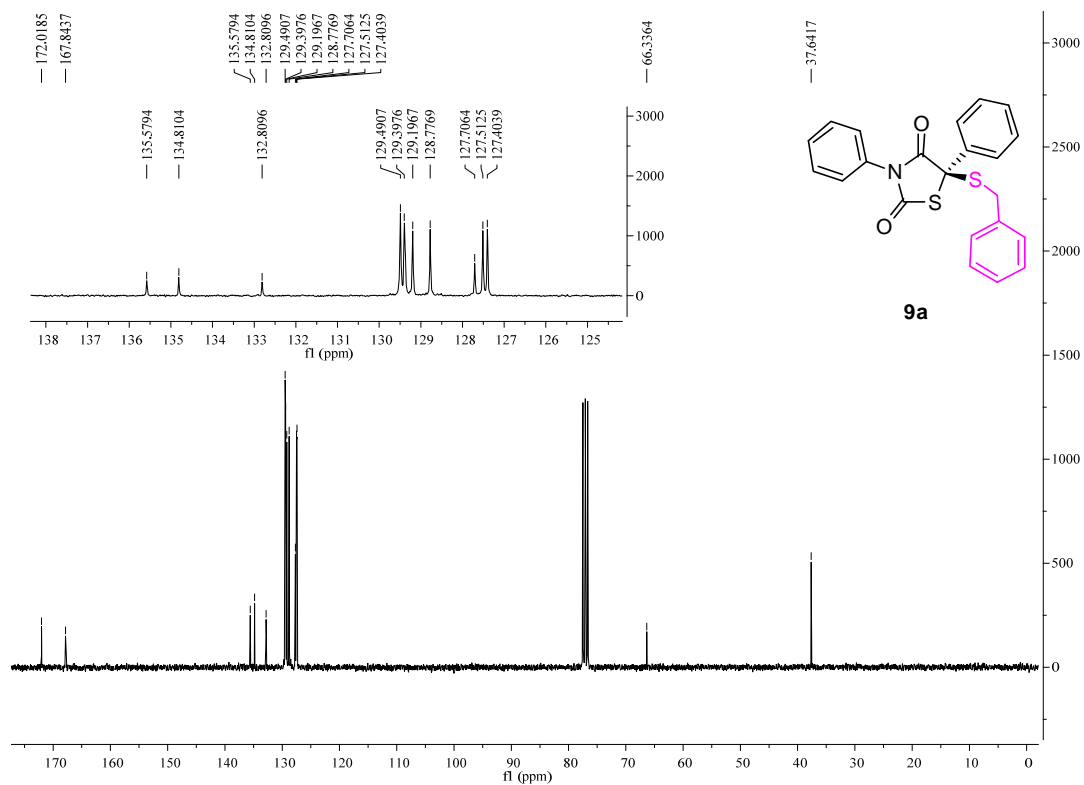

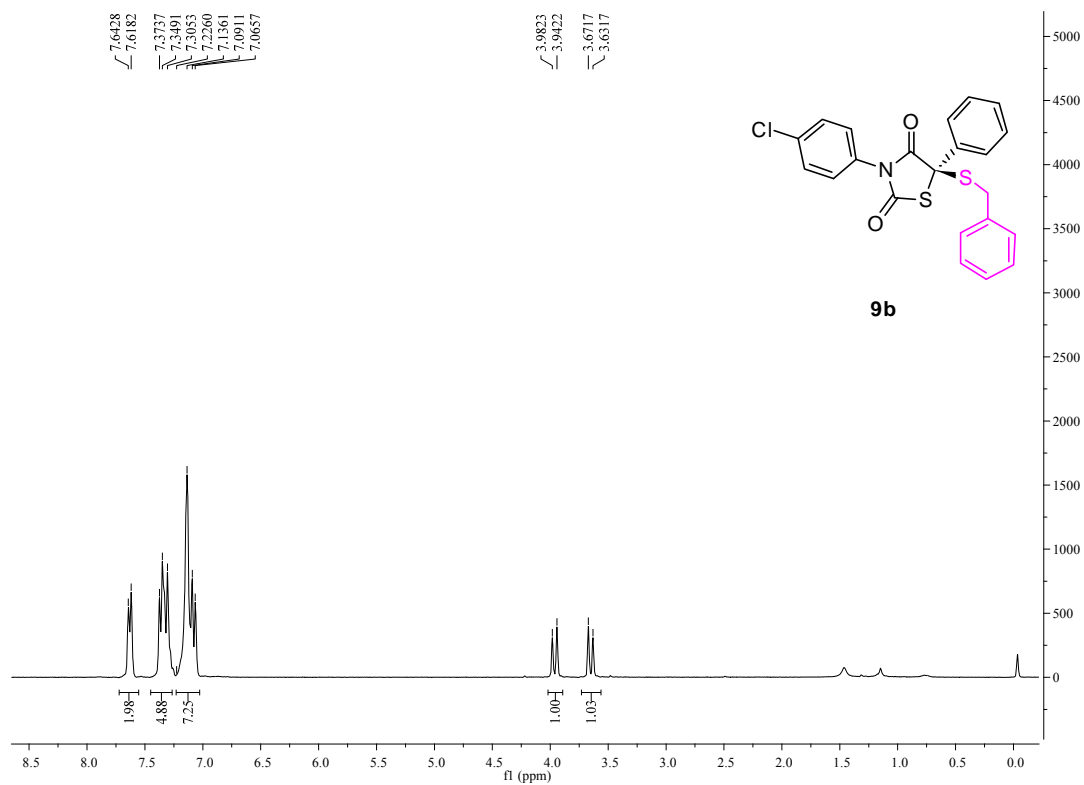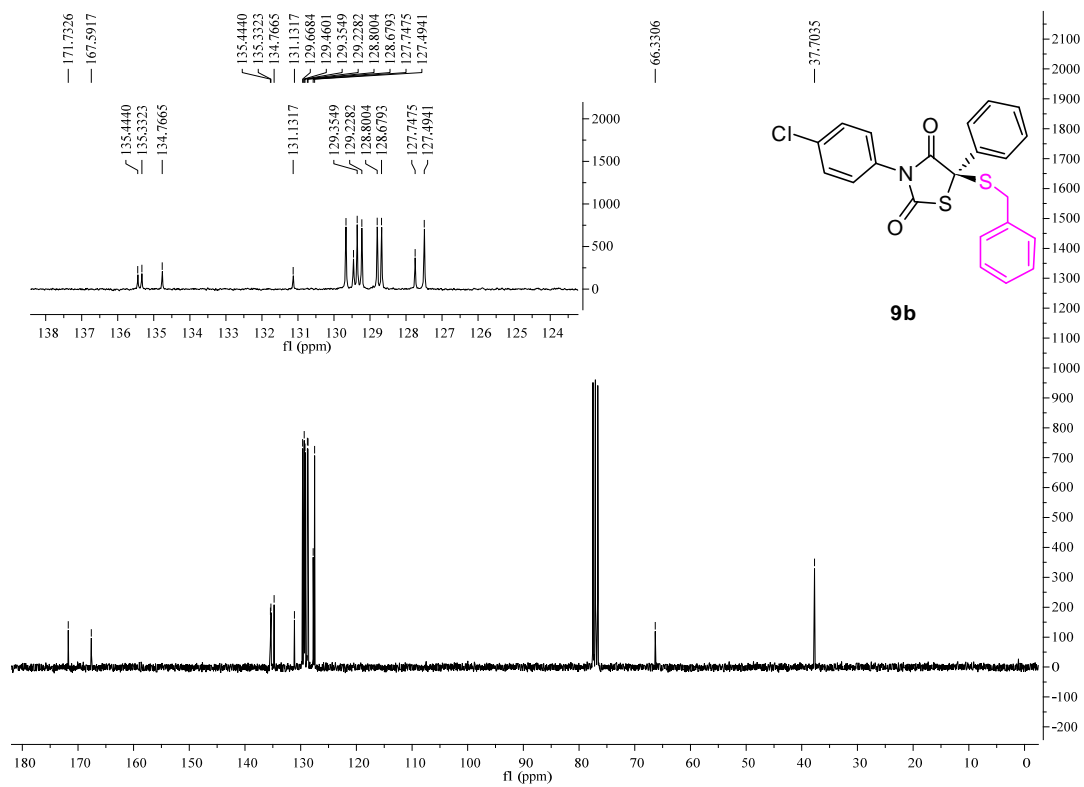



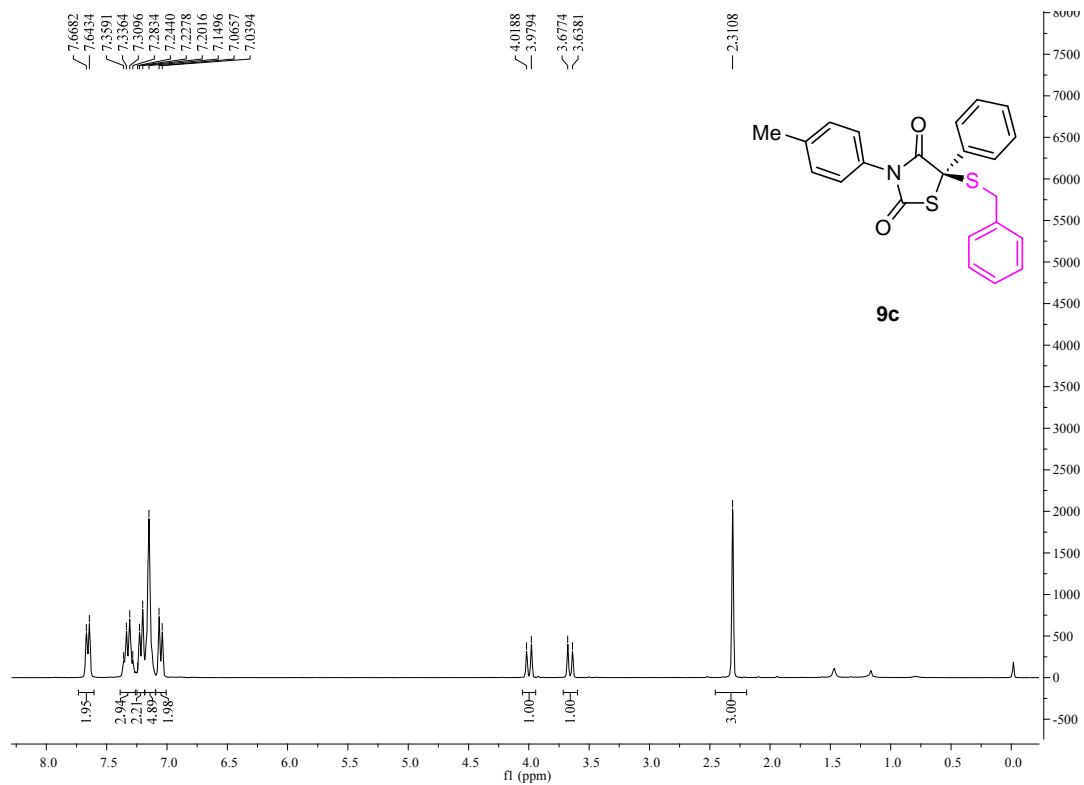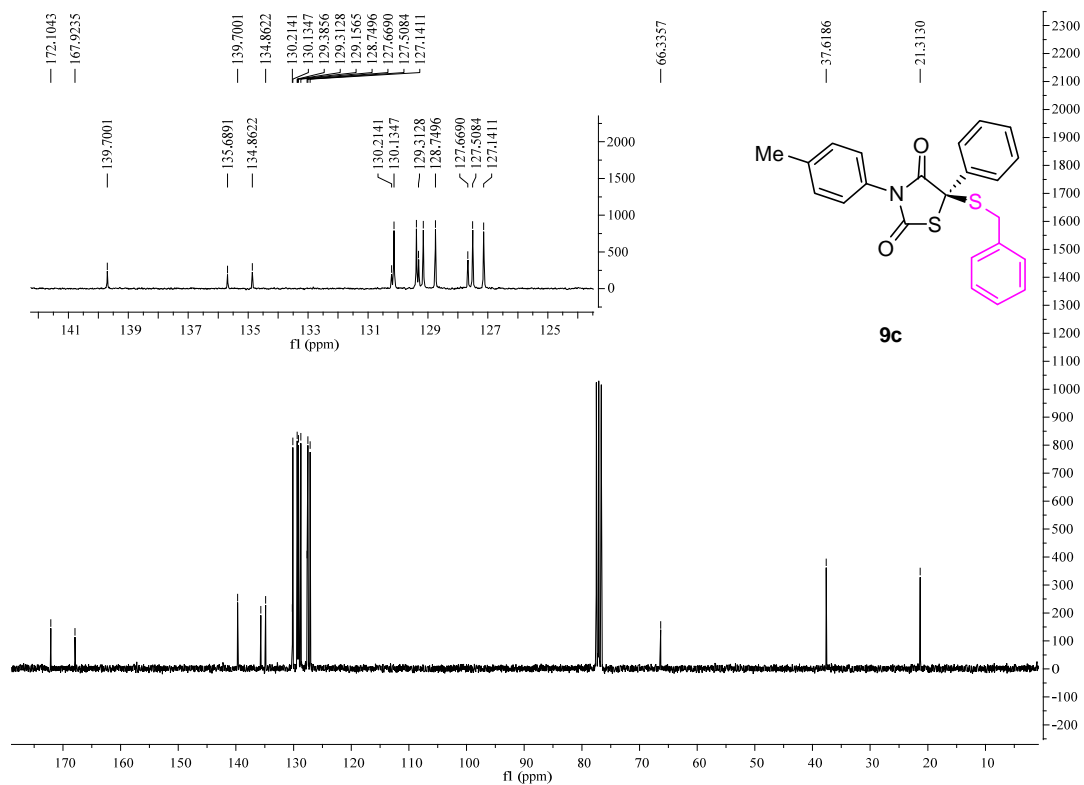

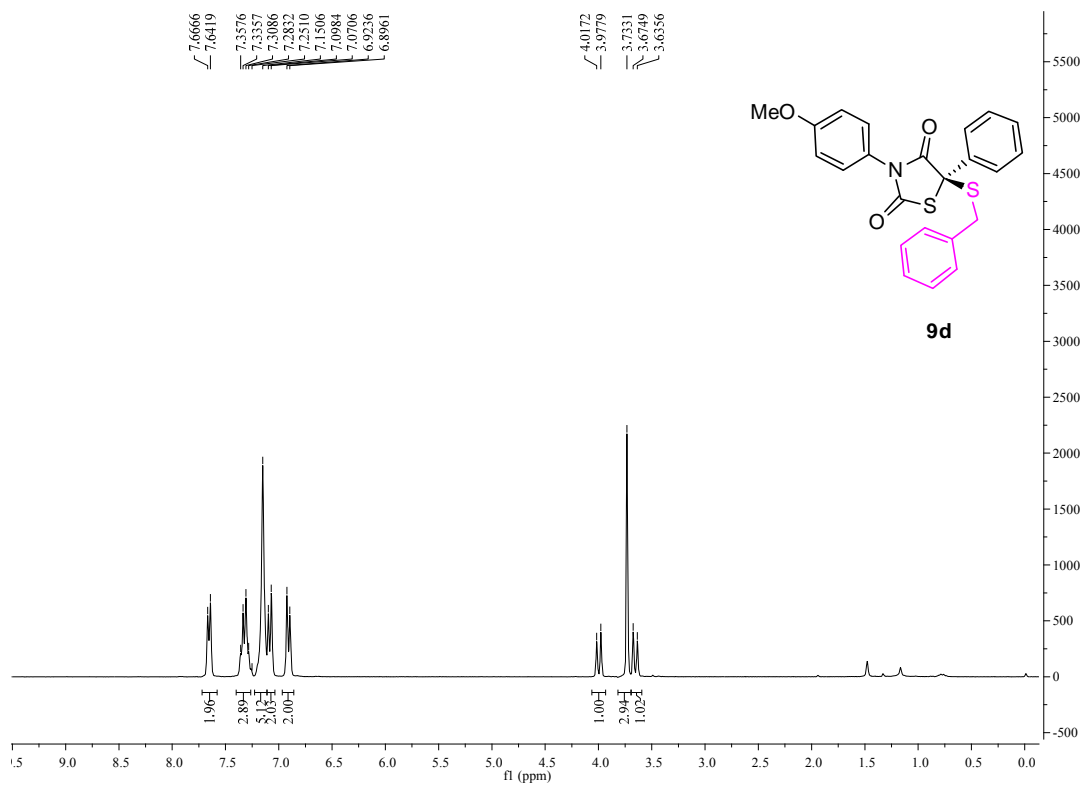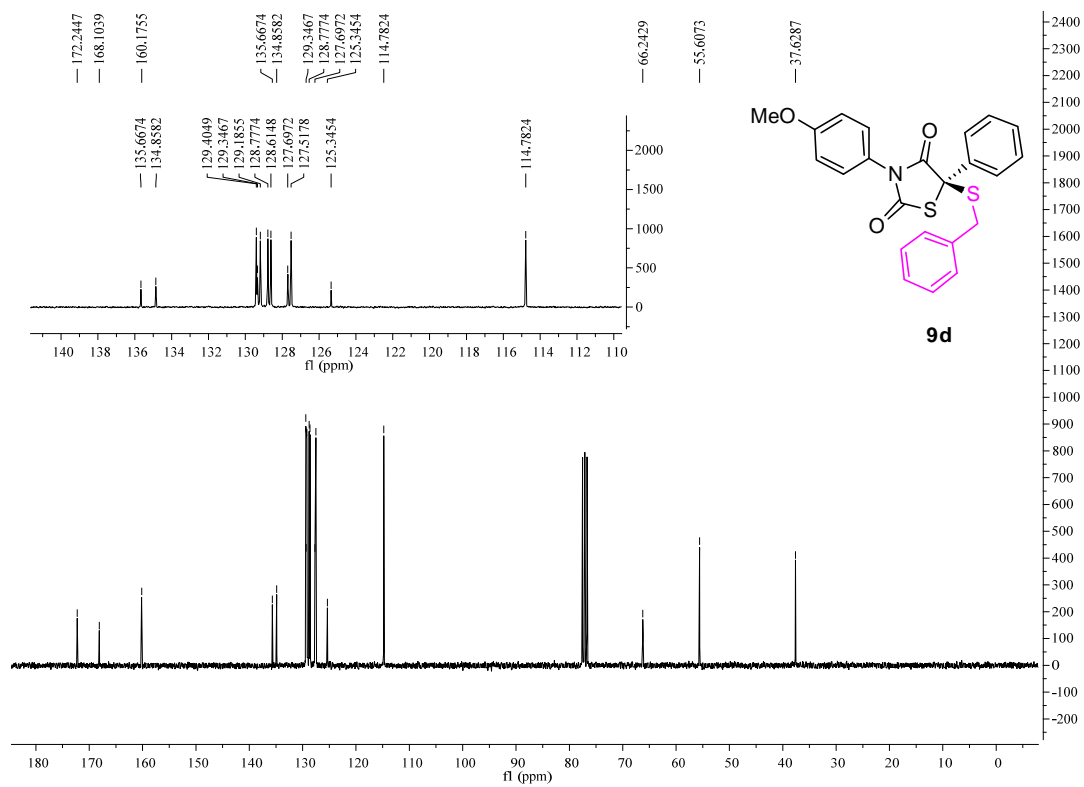

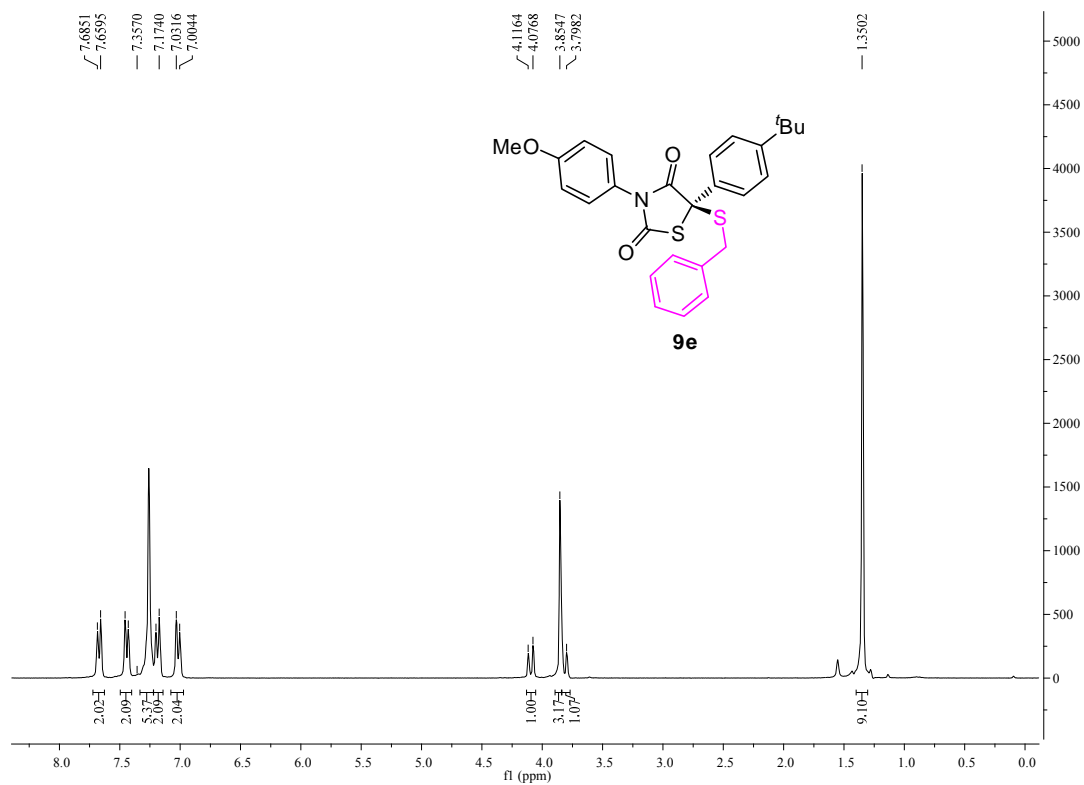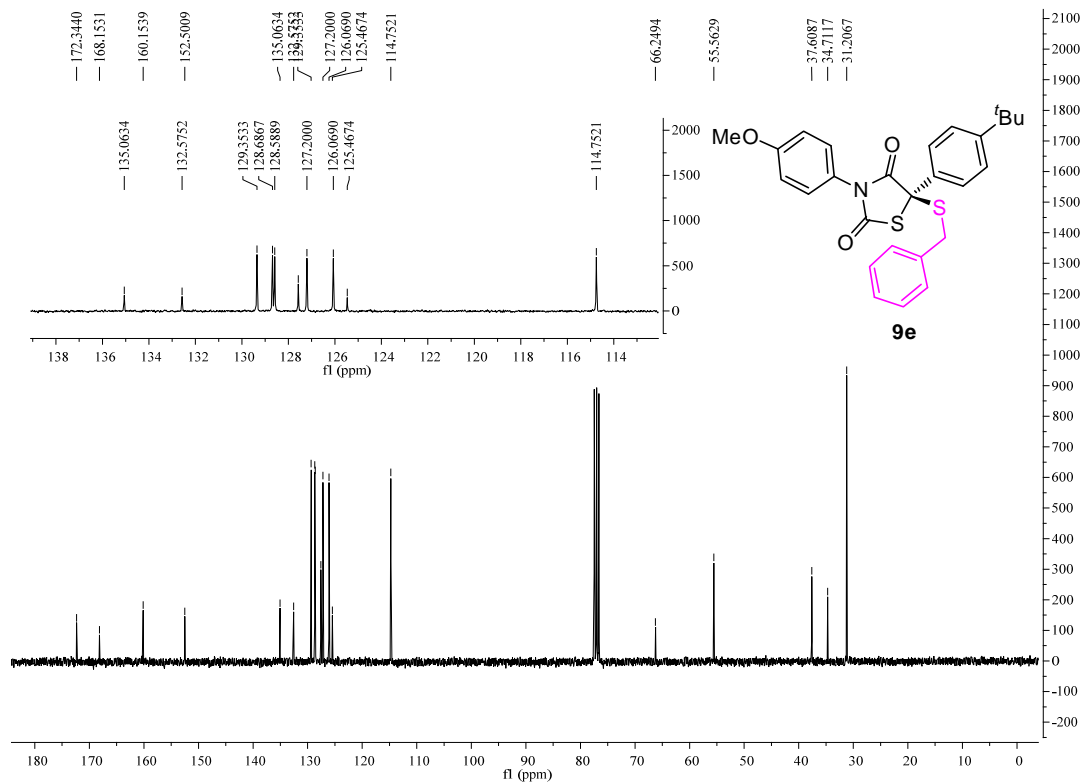

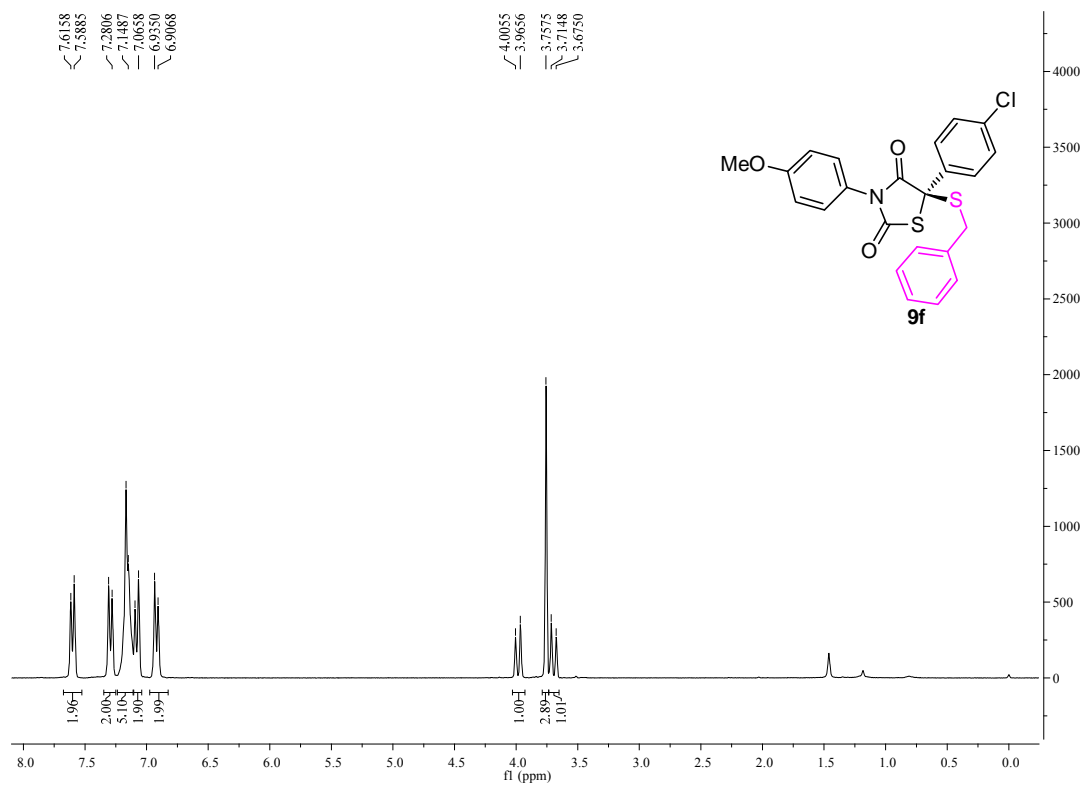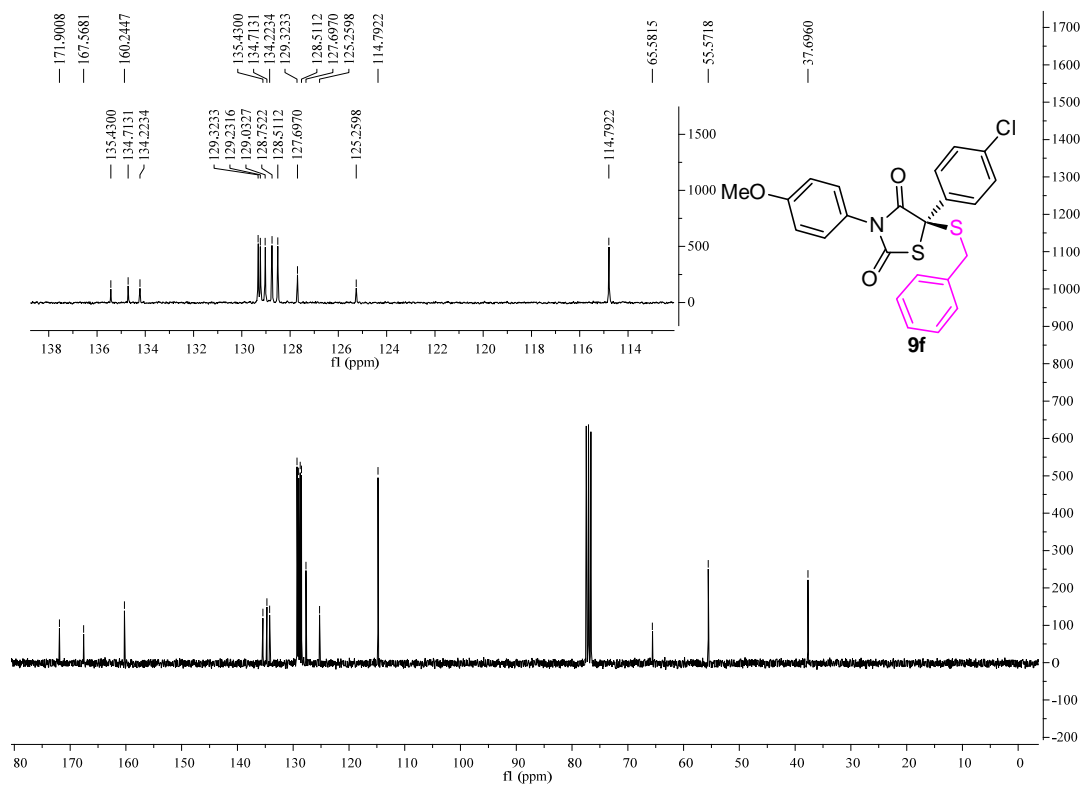

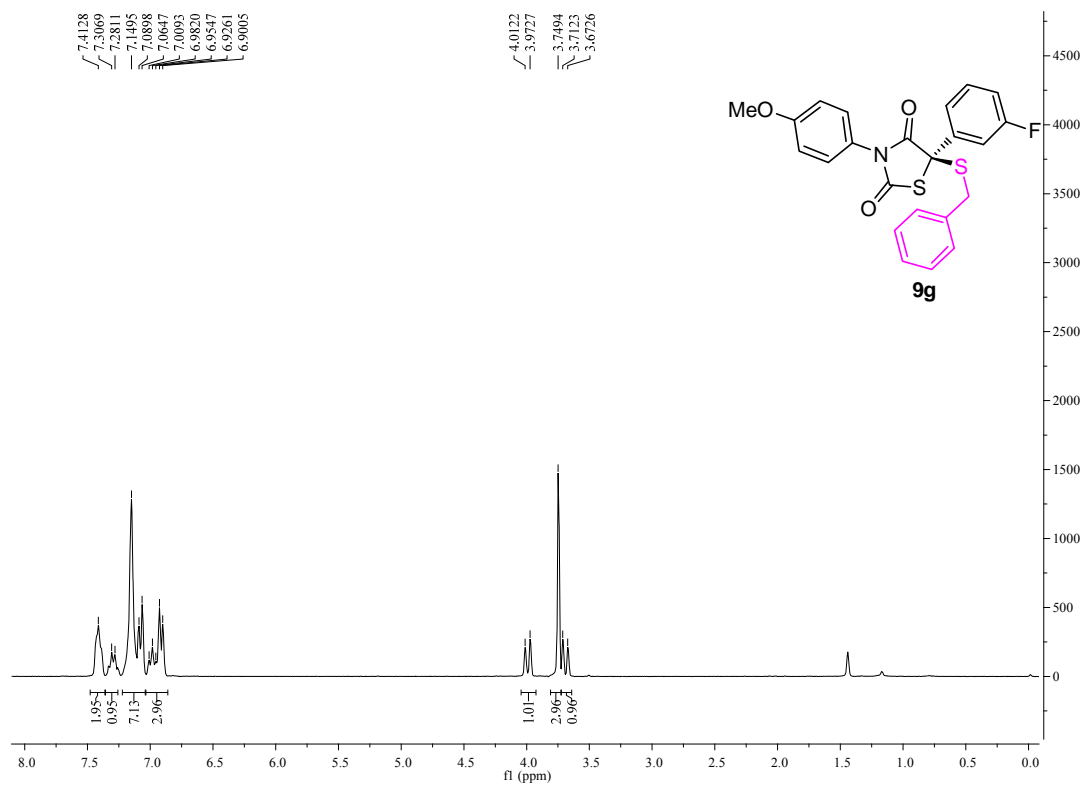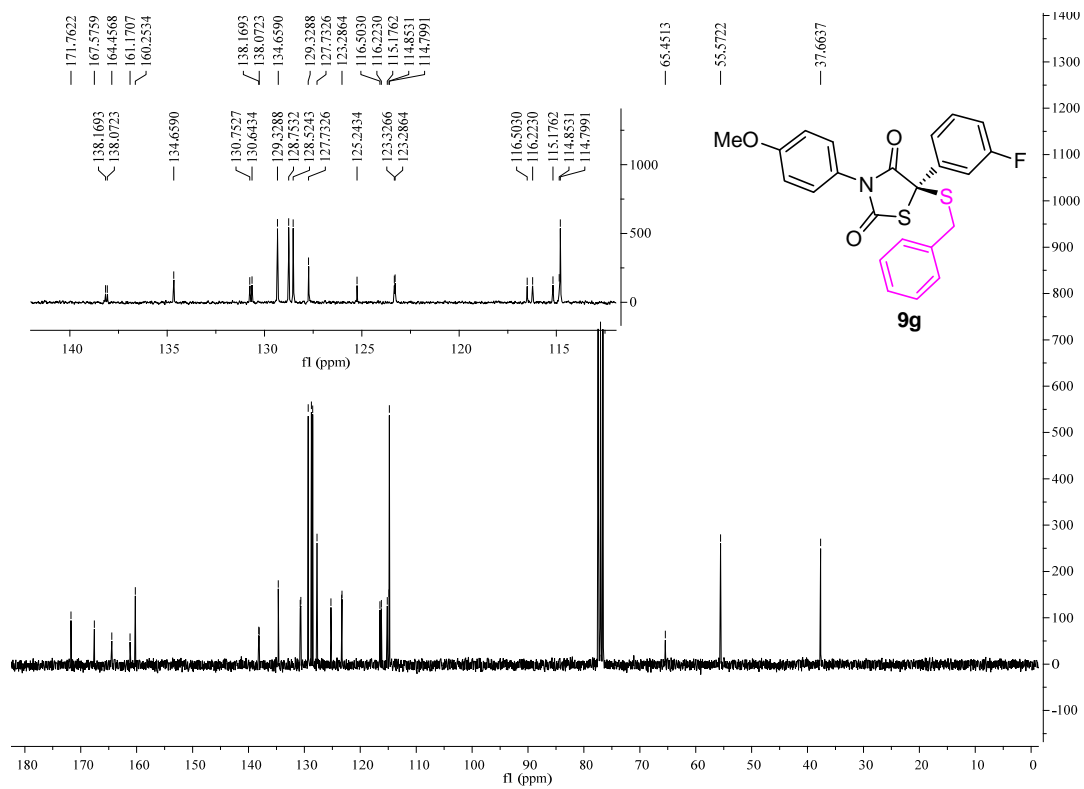

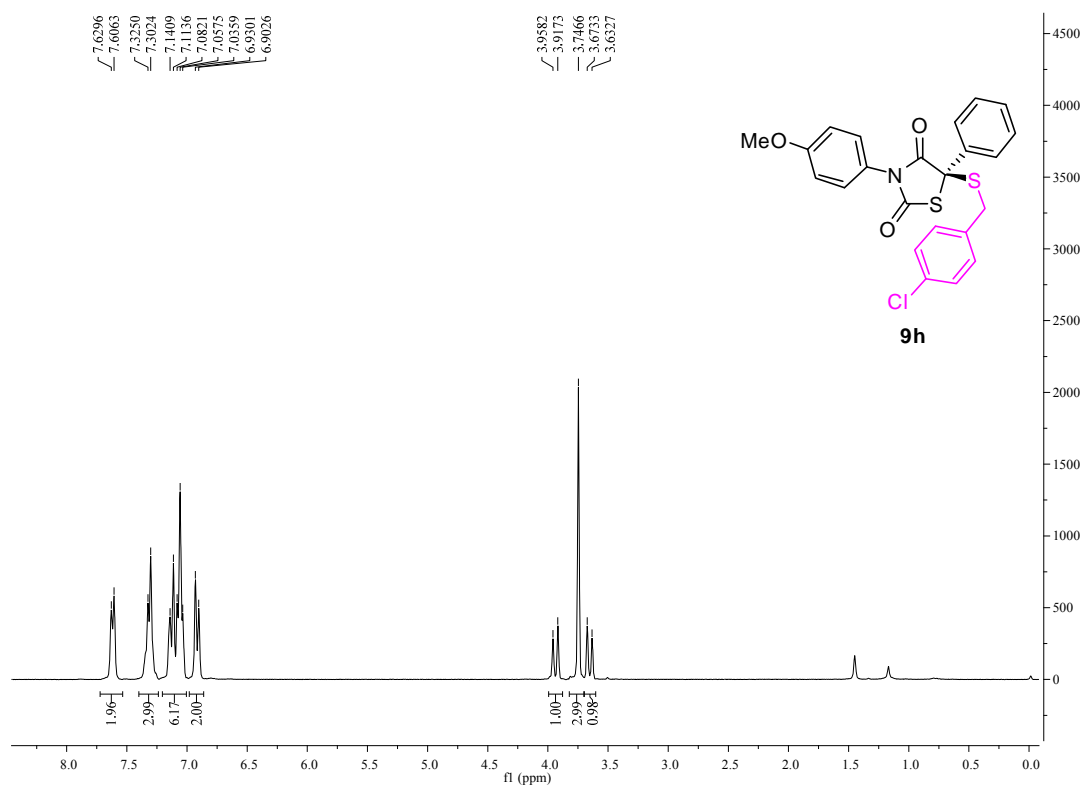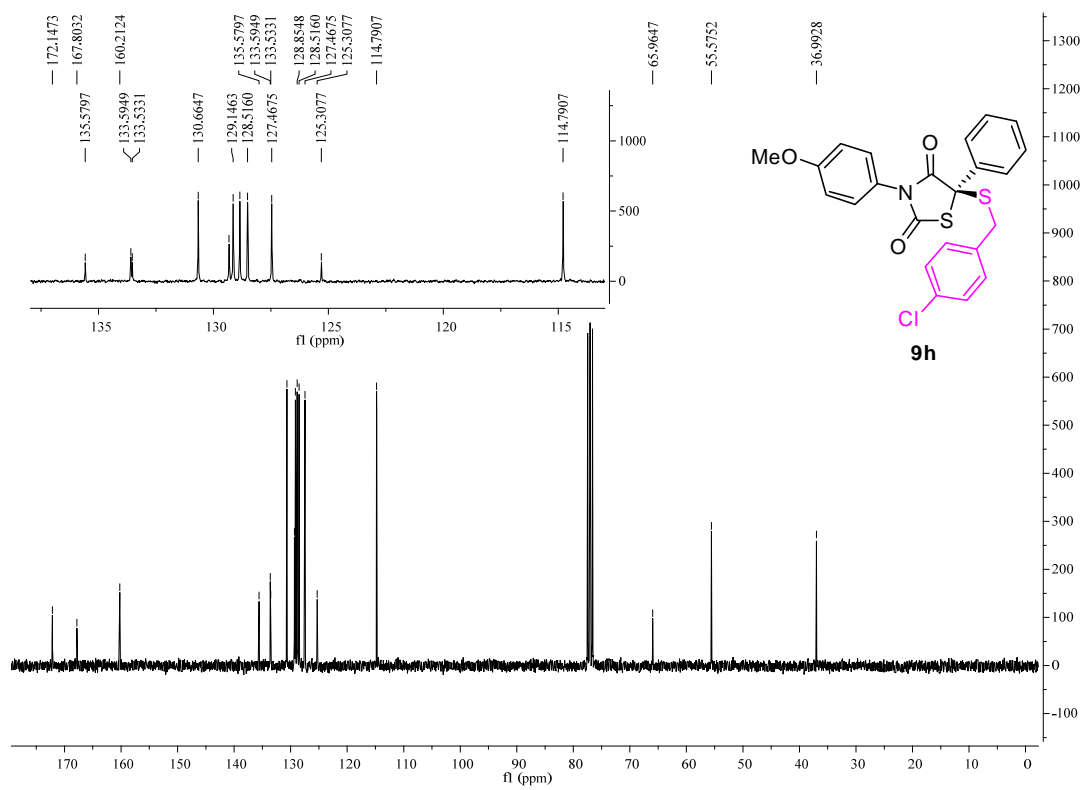

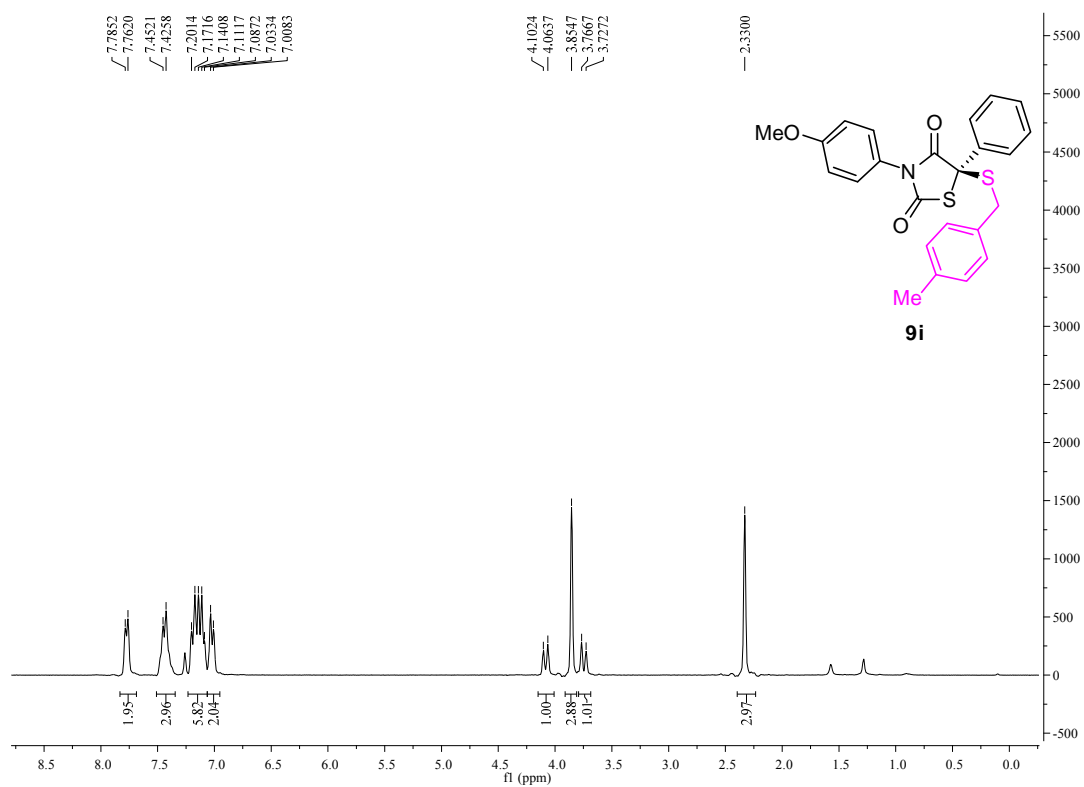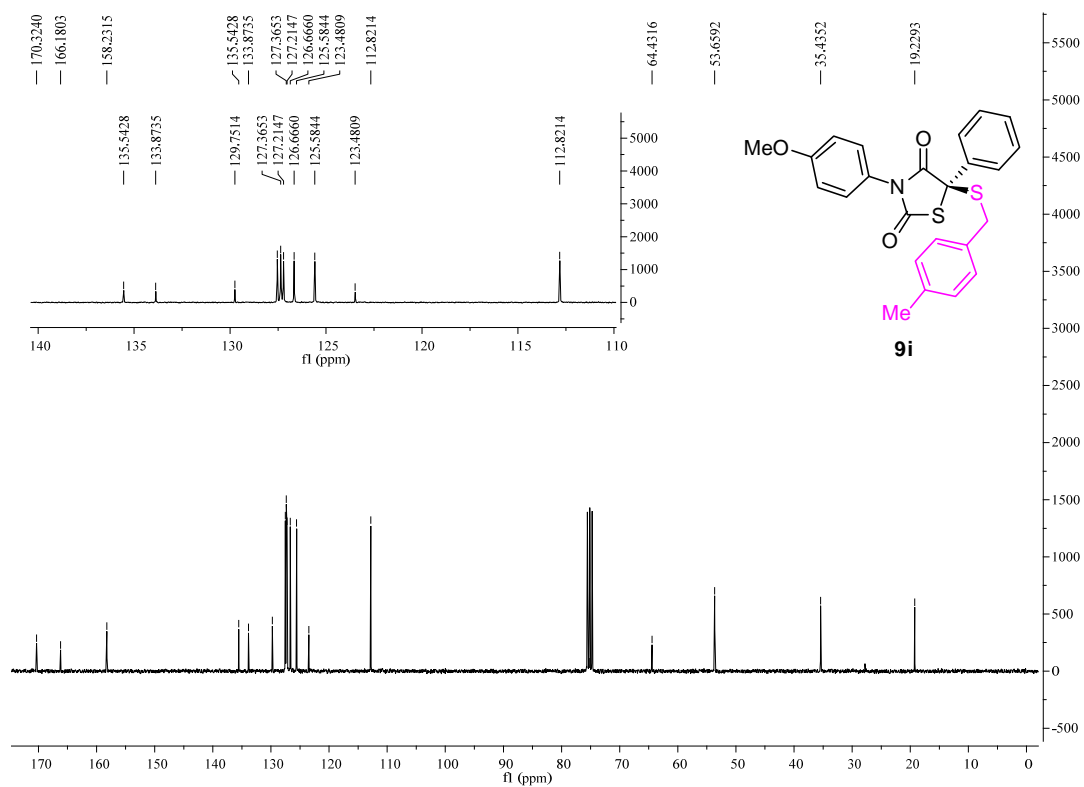

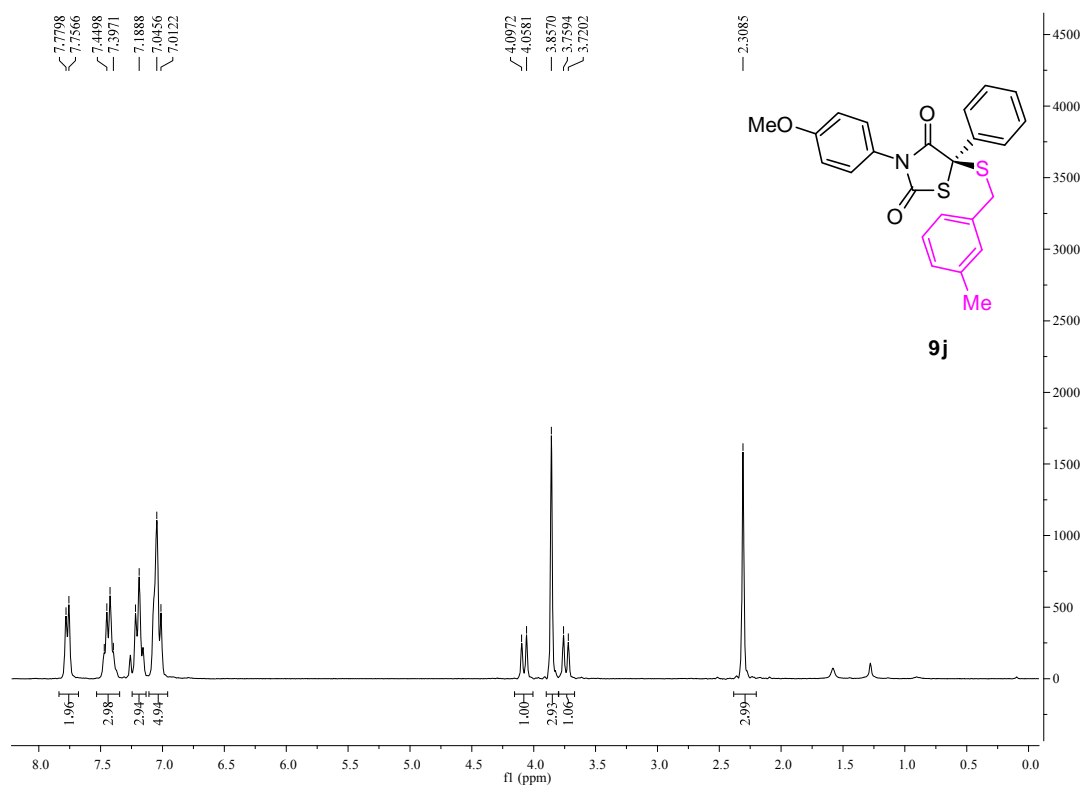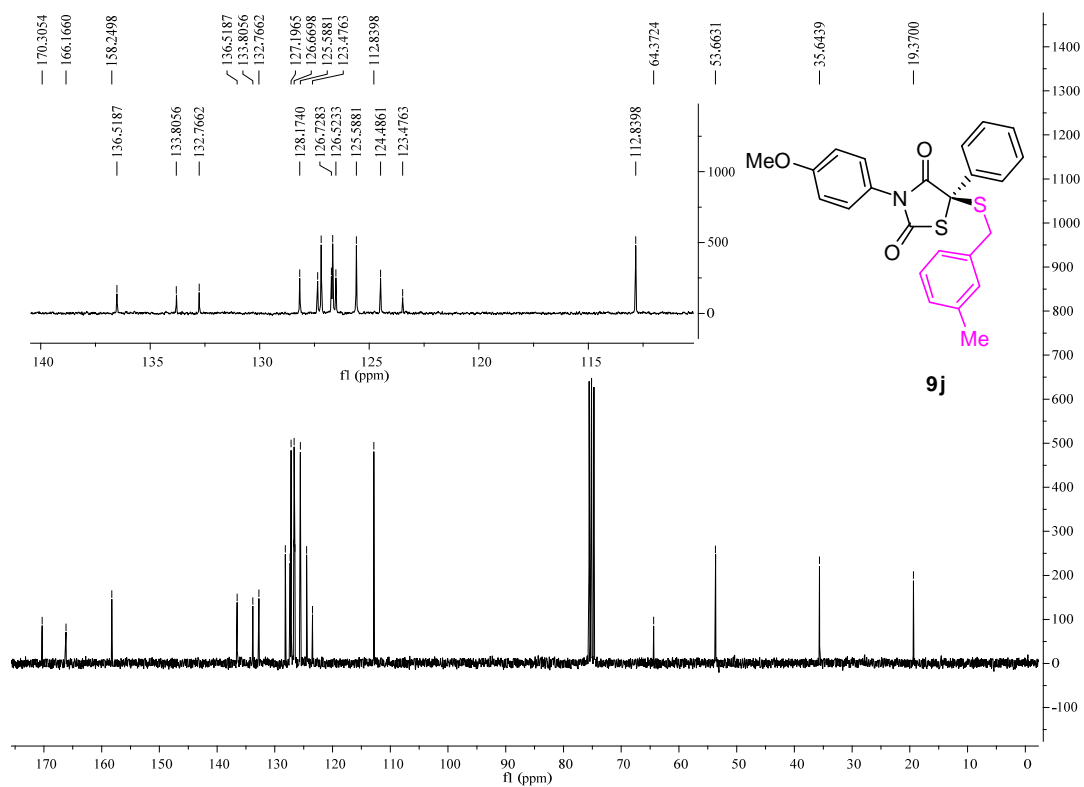



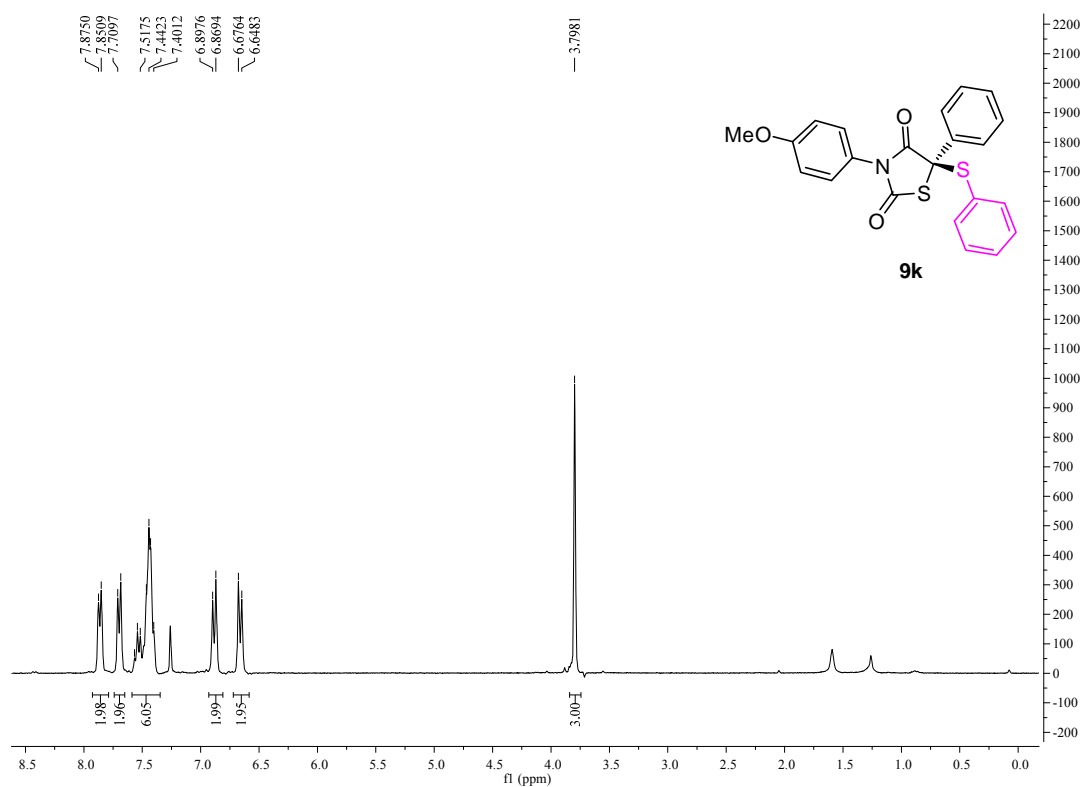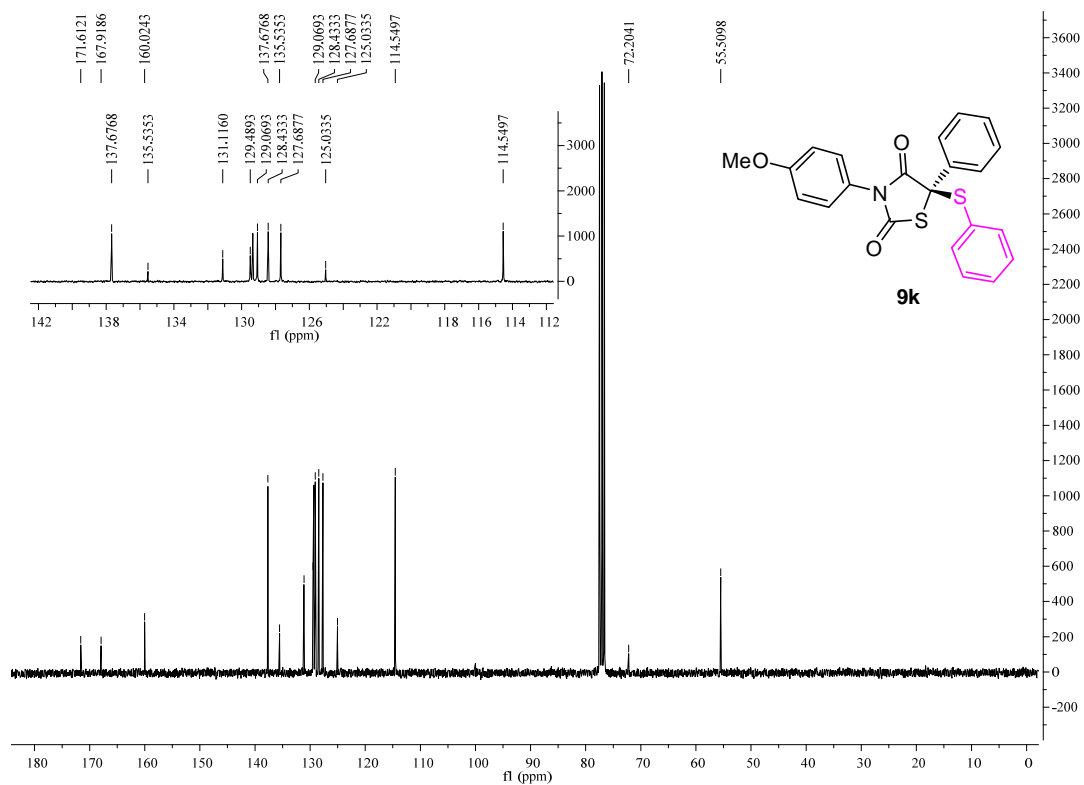

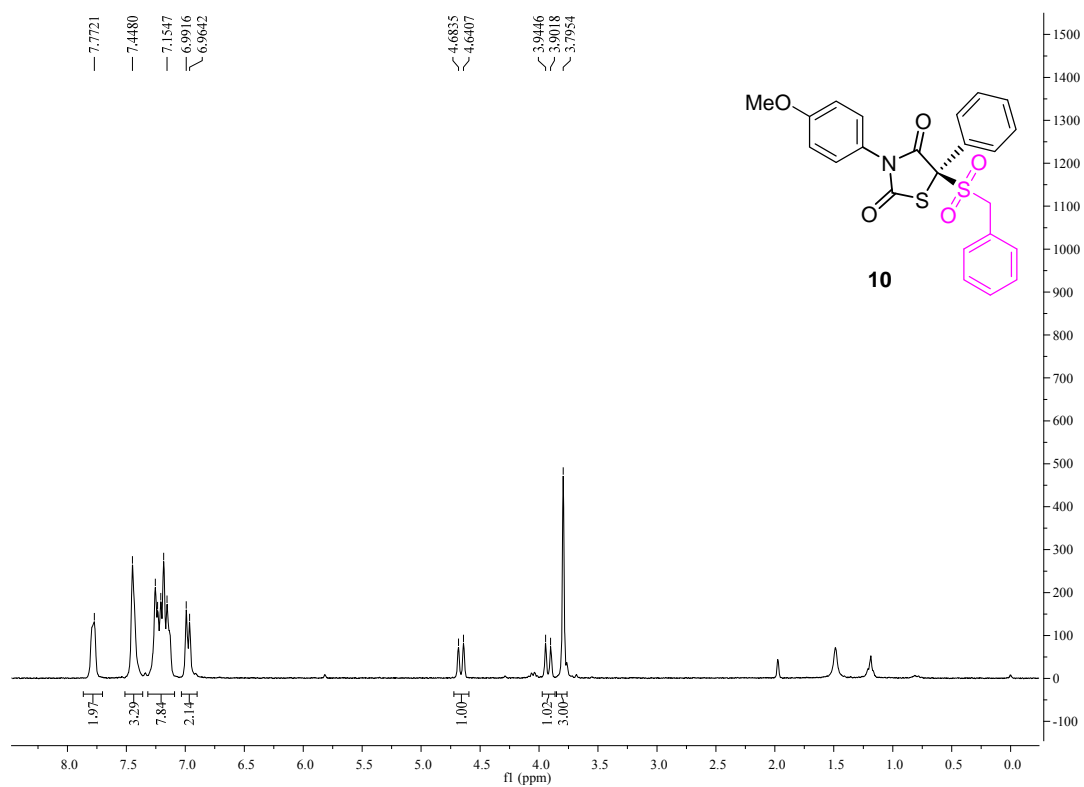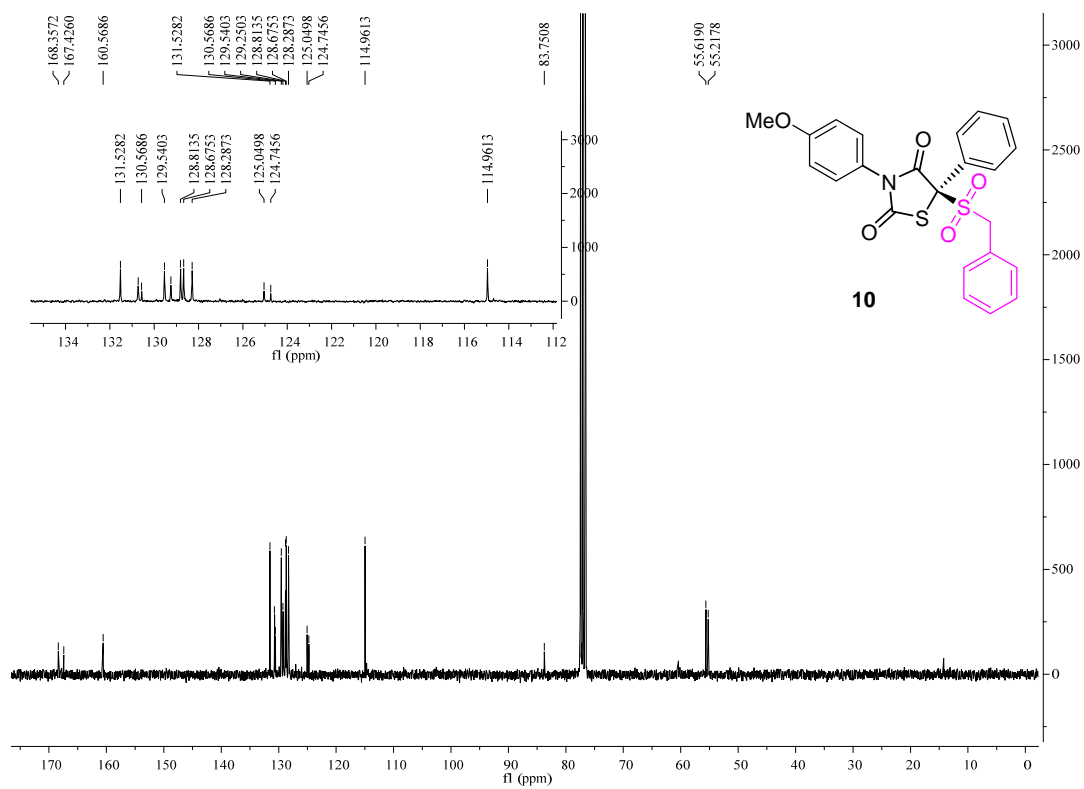

Supplement: jo6b01637_si_001.pdf [file jo6b01637_si_001.pdf]
